# Supplementary material for: Cu(ii)-catalyzed cross-dehydrogenative coupling reaction of N′-acyl arylhydrazines and phosphites
Source: Royal Society of Chemistry journal article supplement (doi:10.1039/c6ra13931k), 2016-01-01

## **Cu(II)-catalyzed cross-dehydrogenative coupling reaction of *N'*-acyl arylhydrazines and phosphites**

Ji-Quan Zhang,<sup>a,c</sup> Yan-Shi Xiong,<sup>a</sup> Albert S. C. Chan,<sup>a</sup> and Gui Lu,<sup>a,b,\*</sup>

<sup>a</sup> Institute of Medicinal Chemistry, School of Pharmaceutical Sciences, Sun Yat-sen University, Guangzhou, 510006, P. R. China; Fax: (+86)-20-39943048; E-mail: lugui@mail.sysu.edu.cn.

<sup>b</sup> Institute of Human Virology, Sun Yat-sen University, Guangzhou, 510080, P. R. China

<sup>c</sup> College of Pharmacy, Guizhou Medical University, Guiyang, 550004, P. R. China

Fax: (+86)-20-39943048

E-mail: lugui@mail.sysu.edu.cn

### **Supporting Information**

- 1. General information**
- 2. Preparation of *N'*-aryl acylhydrazines 1r, 1x and 1y**
- 3. Typical procedure for the Cu(II)-catalyzed CDC reaction**
- 4. X-ray structure of 3t**
- 5. References**
- 6. <sup>1</sup>H, <sup>13</sup>C and <sup>31</sup>P NMR spectra**

## 1. General information

All the commercial reagents were used as such without further purification. All solvents were used as commercial anhydrous grade without further purification. The flash column chromatography was carried out over silica gel (200-300 mesh).  $^1\text{H}$ ,  $^{13}\text{C}$  and  $^{31}\text{P}$  NMR spectra were recorded on a Bruker Avance 400 MHz spectrometer. Chemical shifts in  $^1\text{H}$  NMR spectra are reported in parts per million (ppm) downfield from the internal standard  $\text{Me}_4\text{Si}$  (TMS). Chemical shifts in  $^{13}\text{C}$  NMR spectra are reported relative to the central line of the chloroform signal ( $\delta = 77.0$  ppm). Peaks were labeled as singlet (s), doublet (d), triplet (t), quartet (q), and multiplet (m). High resolution mass spectra were obtained with a Shimadzu LCMS-IT-TOF mass spectrometer. Analytical TLC was performed using EM separations percolated silica gel 0.2 mm layer UV 254 fluorescent sheets. **1a-t** and **1s-w** were synthesized according to literature methods.<sup>1,2</sup>

## 2. Preparation of *N'*-aryl acylhydrazines **1r**, **1x** and **1y**

**2-Bromo-*N'*-phenylbenzohydrazide (1r).** To a solution of 2-bromobenzoic acid (0.8 g, 4.0 mmol) in DMF (10 mL) was added EDC·HCl (0.85 g, 4.4 mmol) and HOBt (0.59 g, 4.4 mmol), then phenylhydrazine (0.44 g, 4.0 mmol) was added and the reaction mixture was stirred at ambient temperature under nitrogen atmosphere for 24 h. The mixture was poured into  $\text{H}_2\text{O}$  (150 mL) and extracted with EtOAc (30 mL $\times$ 3). The organic phases were combined and washed with saturated  $\text{NaHCO}_3$  (30 mL $\times$ 2) and saturated NaCl (30 mL $\times$ 1) respectively, dried over  $\text{Na}_2\text{SO}_4$ . The solution was concentrated *in vacuo* and purified by column chromatography on silica gel (eluting with 3:1 to 1:1 petroleum ether/ethyl acetate) to give **1r** as white solid (1.08 g, 93% yield, mp: 194-196 °C); ESI-MS ( $m/z$ ): 291.2  $[\text{M}+\text{H}]^+$ ;  $^1\text{H}$  NMR (400 MHz,  $\text{CDCl}_3$ )  $\delta$ : 7.82 (s, 1H), 7.64 (d,  $J = 7.9$  Hz, 1H), 7.60 (d,  $J = 7.5$  Hz, 1H), 7.40 (t,  $J = 7.5$  Hz, 1H), 7.34 (t,  $J = 7.6$  Hz, 1H), 7.27 (dd,  $J = 10.3$ , 5.1 Hz, 2H), 6.96 (dd,  $J = 18.1$ , 7.8 Hz, 3H), 6.36 (d,  $J = 3.7$  Hz, 1H);  $^{13}\text{C}$  NMR (100 MHz,  $\text{DMSO}-d_6$ )  $\delta$ : 167.6, 149.6, 137.9, 133.4, 131.9, 129.7, 129.2, 128.2, 119.7, 119.1, 112.8; HRMS (ESI) calcd. for  $\text{C}_{13}\text{H}_{12}\text{BrN}_2\text{O}$   $[\text{M}+\text{H}]^+$ : 291.0127, found: 291.0133.

**tert-Butyl 2-(3,5-dimethylphenyl)hydrazinecarboxylate (1x).** To a solution of (3,5-dimethylphenyl)hydrazine hydrochloride (1.0 g, 5.81 mmol) in dry dichloromethane (20 mL) was added  $\text{Boc}_2\text{O}$  (1.25 g, 5.81 mmol) at 0 °C. The resultant solution was then stirred at reflux for 3 h. Removing the reaction solvent afforded a colorless solid, which was washed with hexane and dried *in vacuo* to give **1x** as white solid (1.21 g, 88% yield, mp: 90-92 °C); ESI-MS ( $m/z$ ): 237.2  $[\text{M}+\text{H}]^+$ ;  $^1\text{H}$  NMR (400 MHz,  $\text{CDCl}_3$ )  $\delta$ : 7.16 (t,  $J = 8.1$  Hz, 1H), 6.90-6.82 (m, 2H), 6.76-6.69 (m, 1H), 6.38 (s, 1H), 1.55 (s, 6H), 1.49 (s, 9H);  $^{13}\text{C}$  NMR (100 MHz,  $\text{CDCl}_3$ )  $\delta$ : 156.4, 148.4, 146.8, 138.9, 138.0, 122.8, 110.9, 85.2, 81.1, 28.2 (d,  $J = 9.8$  Hz), 27.4, 21.4 (d,  $J = 11.3$  Hz); HRMS (ESI) calcd. for  $\text{C}_{13}\text{H}_{21}\text{N}_2\text{O}_2$   $[\text{M}+\text{H}]^+$ : 237.1597, found: 237.1562.

***N'*-Methyl-*N'*-phenylbenzohydrazide (1y).**<sup>3</sup> Freshly cut Na (0.11 g, 4.72 mmol) was added to absolute ethanol (5.0 mL) to obtain a clear solution. Then *N'*-phenylbenzohydrazide (**1a**, 1.0 g, 4.72 mmol) was added to the clear solution, followed by the addition of  $\text{CH}_3\text{I}$  (0.81 g, 5.66 mmol). The resulting solution was kept at reflux for 24 h. The solution was concentrated and the residue

was dissolved in EtOAc (30 mL), washed with water and dried over Na<sub>2</sub>SO<sub>4</sub>. The solution was concentrated *in vacuo* and purified by column chromatography on silica gel (eluting with 3:1 petroleum ether/ethyl acetate) to afford **1e** as white solid (0.69 g, 65% yield); ESI-MS (*m/z*): 237.2 [M+H]<sup>+</sup>; <sup>1</sup>H NMR (400 MHz, CDCl<sub>3</sub>) δ: 7.91 (s, 1H), 7.87-7.82 (m, 2H), 7.56 (t, *J* = 7.4 Hz, 1H), 7.47 (t, *J* = 7.5 Hz, 2H), 7.30-7.24 (m, 3H), 6.89 (dd, *J* = 14.5, 7.6 Hz, 3H), 3.30 (s, 3H).

### 3. Typical procedure for the Cu(II)-catalyzed CDC reaction

To a mixture of *N'*-aryl acylhydrazine (0.3 mmol), Cu(OAc)<sub>2</sub>·H<sub>2</sub>O (0.03 mmol), AgNO<sub>3</sub> (0.06 mmol), NMO (0.6 mmol) and MS 4Å (30 mg) in DMSO (2.0 mL) was added diisopropyl phosphonate (0.6 mmol), the resulting mixture was stirred at ambient temperature for 12-24 h. After completion of the reaction (indicated by TLC), the mixture was quenched with saturated NaCl solution, extracted with EtOAc, and dried over Na<sub>2</sub>SO<sub>4</sub>. The crude product was purified by flash column chromatography to provide the corresponding product **3a-x**.

**Diisopropyl (2-benzoyl-1-phenylhydrazinyl)phosphonate (3a).** White solid; mp: 166-167 °C; <sup>1</sup>H NMR (400 MHz, DMSO-*d*<sub>6</sub>) δ: 10.88 (s, 1H), 7.97-7.92 (m, 2H), 7.62 (m, 1H), 7.54 (dd, *J* = 10.2, 4.6 Hz, 2H), 7.33-7.26 (m, 2H), 7.22 (d, *J* = 7.8 Hz, 2H), 6.99 (t, *J* = 7.2 Hz, 1H), 4.94 (s, 1H), 4.70 (s, 1H), 1.29 (d, *J* = 6.1 Hz, 6H), 1.12 (s, 6H); <sup>13</sup>C NMR (100 MHz, DMSO-*d*<sub>6</sub>) δ: 166.3, 143.3 (d, *J* = 13.2 Hz), 132.5, 132.0, 128.6, 128.5, 127.6, 122.2, 117.0 (d, *J* = 2.0 Hz), 71.4 (d, *J* = 10.1 Hz), 23.6, 23.3; <sup>31</sup>P NMR (162 MHz, CDCl<sub>3</sub>) δ: 0.15; HRMS (ESI) calcd. for C<sub>19</sub>H<sub>26</sub>N<sub>2</sub>O<sub>4</sub>P [M+H]<sup>+</sup>: 377.1625, found: 377.1627.

**Diisopropyl (2-benzoyl-1-(4-fluorophenyl)hydrazinyl)phosphonate (3b).** White solid; mp: 143-144 °C; <sup>1</sup>H NMR (400 MHz, CDCl<sub>3</sub>) δ: 9.76 (s, 1H), 7.88-7.81 (m, 2H), 7.44 (dd, *J* = 10.7, 4.1 Hz, 1H), 7.34 (m, 4H), 7.00-6.91 (m, 2H), 4.88 (m, 2H), 1.35 (d, *J* = 5.7 Hz, 6H), 1.24 (d, *J* = 6.1 Hz, 6H); <sup>13</sup>C NMR (100 MHz, CDCl<sub>3</sub>) δ: 167.0, 160.6, 158.2, 139.3 (d, *J* = 12.7 Hz), 131.9 (d, *J* = 18.8 Hz), 128.2, 127.6, 121.9 (d, *J* = 6.5 Hz), 115.3, 73.2 (d, *J* = 5.7 Hz), 23.7 (dd, *J* = 20.3, 4.9 Hz); <sup>31</sup>P NMR (162 MHz, CDCl<sub>3</sub>) δ: 0.24; HRMS (ESI) calcd. for C<sub>19</sub>H<sub>25</sub>FN<sub>2</sub>O<sub>4</sub>P [M+H]<sup>+</sup>: 395.1530, found: 395.1547.

**Diisopropyl (2-benzoyl-1-(4-chlorophenyl)hydrazinyl)phosphonate (3c).** White solid; mp: 148-150 °C; <sup>1</sup>H NMR (400 MHz, CDCl<sub>3</sub>) δ: 9.29 (s, 1H), 7.85 (d, *J* = 7.7 Hz, 2H), 7.48 (t, *J* = 7.4 Hz, 1H), 7.36 (t, *J* = 7.6 Hz, 2H), 7.27 (d, *J* = 8.5 Hz, 2H), 7.22 (d, *J* = 9.0 Hz, 2H), 4.88 (dd, *J* = 12.4, 6.2 Hz, 2H), 1.36 (d, *J* = 6.1 Hz, 6H), 1.25 (d, *J* = 6.1 Hz, 6H); <sup>13</sup>C NMR (100 MHz, CDCl<sub>3</sub>) δ: 167.0, 141.9 (d, *J* = 13.2 Hz), 132.0, 131.9, 128.7, 128.6, 128.3, 127.7, 120.1 (d, *J* = 2.2 Hz), 73.4 (d, *J* = 5.6 Hz), 23.7 (dd, *J* = 18.4, 4.9 Hz); <sup>31</sup>P NMR (162 MHz, CDCl<sub>3</sub>) δ: -0.25; HRMS (ESI) calcd. for C<sub>19</sub>H<sub>25</sub>ClN<sub>2</sub>O<sub>4</sub>P [M+H]<sup>+</sup>: 411.1235, found: 411.1245.

**Diisopropyl (2-benzoyl-1-(4-bromophenyl)hydrazinyl)phosphonate (3d).** White solid; mp: 160-161 °C; <sup>1</sup>H NMR (400 MHz, CDCl<sub>3</sub>) δ: 9.06 (s, 1H), 7.88-7.82 (m, 2H), 7.50 (dd, *J* = 11.8, 4.4 Hz, 1H), 7.38 (t, *J* = 8.3 Hz, 4H), 7.23-7.19 (m, 2H), 4.88 (dd, *J* = 12.6, 6.2 Hz, 2H), 1.37 (d, *J* = 6.2 Hz, 6H), 1.25 (d, *J* = 6.1 Hz, 6H); <sup>13</sup>C NMR (100 MHz, CDCl<sub>3</sub>) δ: 167.0, 142.4 (d, *J* = 13.2 Hz), 132.0, 131.9, 131.6, 128.3, 127.7, 120.3 (d, *J* = 2.4 Hz), 116.1, 73.4 (d, *J* = 5.6 Hz), 23.7 (dd, *J* = 17.9, 4.9 Hz); <sup>31</sup>P NMR (162 MHz, CDCl<sub>3</sub>) δ: -0.18; HRMS (ESI) calcd. for C<sub>19</sub>H<sub>25</sub>BrN<sub>2</sub>O<sub>4</sub>P [M+H]<sup>+</sup>: 455.0730, found: 455.0731.

**Diisopropyl (2-benzoyl-1-(3-chlorophenyl)hydrazinyl)phosphonate (3e).** White solid; mp: 156-157 °C; <sup>1</sup>H NMR (400 MHz, CDCl<sub>3</sub>) δ: 9.46 (s, 1H), 7.91-7.84 (m, 2H), 7.47 (t, *J* = 7.4 Hz, 1H), 7.39-7.31 (m, 3H), 7.24-7.15 (m, 2H), 7.03-6.98 (m, 1H), 4.89 (d, *J* = 5.7 Hz, 2H), 1.37 (d, *J* = 6.1 Hz, 6H), 1.25 (d, *J* = 6.0 Hz, 6H); <sup>13</sup>C NMR (100 MHz, CDCl<sub>3</sub>) δ: 167.0, 144.5 (d, *J* = 13.4 Hz), 134.4, 131.9, 131.8, 129.7, 128.3, 127.7, 123.2, 118.5, 116.5, 73.5 (d, *J* = 5.7 Hz), 23.7 (dd, *J* = 17.9, 4.8 Hz); <sup>31</sup>P NMR (162 MHz, CDCl<sub>3</sub>) δ: -0.59; HRMS (ESI) calcd. for C<sub>19</sub>H<sub>25</sub>ClN<sub>2</sub>O<sub>4</sub>P [M+H]<sup>+</sup>: 411.1235, found: 411.1242.

**Diisopropyl (2-benzoyl-1-(2-chlorophenyl)hydrazinyl)phosphonate (3f).** White solid; mp: 96-98 °C; <sup>1</sup>H NMR (400 MHz, CDCl<sub>3</sub>) δ: 8.47 (s, 1H), 7.87 (d, *J* = 7.8 Hz, 1H), 7.78-7.74 (m, 2H), 7.52 (dd, *J* = 8.5, 6.3 Hz, 1H), 7.45-7.37 (m, 3H), 7.31 (dd, *J* = 7.6, 1.4 Hz, 1H), 7.21 (td, *J* = 7.7, 1.5 Hz, 1H), 4.84 (dq, *J* = 12.5, 6.2 Hz, 2H), 1.37 (d, *J* = 6.1 Hz, 6H), 1.27 (d, *J* = 6.1 Hz, 6H); <sup>13</sup>C NMR (100 MHz, CDCl<sub>3</sub>) δ: 166.3, 139.1 (d, *J* = 13.1 Hz), 132.6, 132.1, 132.0, 130.1, 128.7, 128.7, 127.4, 127.3, 73.0 (d, *J* = 5.8 Hz), 23.9 (d, *J* = 3.0 Hz), 23.6 (d, *J* = 6.8 Hz); <sup>31</sup>P NMR (162 MHz, CDCl<sub>3</sub>) δ: 0.12; HRMS (ESI) calcd. for C<sub>19</sub>H<sub>25</sub>ClN<sub>2</sub>O<sub>4</sub>P [M+H]<sup>+</sup>: 411.1235, found: 411.1245.

**Diisopropyl (2-benzoyl-1-(4-methoxyphenyl)hydrazinyl)phosphonate (3g).** White solid; mp: 124-125 °C; <sup>1</sup>H NMR (400 MHz, CDCl<sub>3</sub>) δ: 9.26 (s, 1H), 7.86-7.79 (m, 2H), 7.46 (t, *J* = 7.4 Hz, 1H), 7.35 (dd, *J* = 12.3, 5.4 Hz, 4H), 6.81 (d, *J* = 9.0 Hz, 2H), 4.88 (dq, *J* = 12.5, 6.2 Hz, 2H), 3.76 (s, 3H), 1.34 (d, *J* = 6.2 Hz, 6H), 1.24 (d, *J* = 6.1 Hz, 6H); <sup>13</sup>C NMR (100 MHz, CDCl<sub>3</sub>) δ: 167.0, 156.7, 136.4 (d, *J* = 12.8 Hz), 132.4, 131.8, 128.3, 127.6, 123.1 (d, *J* = 2.2 Hz), 114.0, 72.9 (d, *J* = 5.7 Hz), 55.5, 23.8 (dd, *J* = 23.3, 5.0 Hz); <sup>31</sup>P NMR (162 MHz, CDCl<sub>3</sub>) δ: 0.79; HRMS (ESI) calcd. for C<sub>20</sub>H<sub>28</sub>N<sub>2</sub>O<sub>5</sub>P [M+H]<sup>+</sup>: 407.1730, found: 407.1738.

**Diisopropyl (2-benzoyl-1-(4-nitrophenyl)hydrazinyl)phosphonate (3h).** Brown solid; mp: 125-128 °C; <sup>1</sup>H NMR (400 MHz, CDCl<sub>3</sub>) δ: 9.19 (s, 1H), 8.16 (d, *J* = 9.2 Hz, 2H), 7.90-7.85 (m, 2H), 7.53 (dd, *J* = 10.5, 4.4 Hz, 1H), 7.43-7.35 (m, 4H), 4.91 (s, 2H), 1.40 (t, *J* = 5.8 Hz, 6H), 1.27 (d, *J* = 6.4 Hz, 6H); <sup>13</sup>C NMR (100 MHz, CDCl<sub>3</sub>) δ: 167.1, 148.9 (d, *J* = 13.0 Hz), 142.6, 132.5, 131.4, 128.6, 127.6, 124.9, 116.5, 74.2 (d, *J* = 4.8 Hz), 23.7 (dd, *J* = 20.7, 4.6 Hz); <sup>31</sup>P NMR (162 MHz, CDCl<sub>3</sub>) δ: -1.44; HRMS (ESI) calcd. for C<sub>19</sub>H<sub>25</sub>N<sub>3</sub>O<sub>6</sub>P [M+H]<sup>+</sup>: 422.1475, found: 422.1487.

**Diisopropyl (1-benzoyl-2-(4-nitrophenyl)hydrazinyl)phosphonate (3h').** White solid; mp: 121-123 °C; <sup>1</sup>H NMR (400 MHz, CDCl<sub>3</sub>) δ: 9.72 (s, 1H), 8.19 (d, *J* = 9.3 Hz, 2H), 7.89-7.82 (m, 2H), 7.45-7.40 (m, 3H), 7.20-7.15 (m, 2H), 4.80 (dq, *J* = 12.5, 6.2 Hz, 2H), 1.38 (d, *J* = 6.2 Hz, 6H), 1.28 (d, *J* = 6.2 Hz, 6H); <sup>13</sup>C NMR (100 MHz, CDCl<sub>3</sub>) δ: 149.5, 140.5, 137.1 (d, *J* = 11.1 Hz), 131.0, 130.1, 128.5, 126.3, 126.1, 112.1, 75.3 (d, *J* = 6.3 Hz), 23.5 (dd, *J* = 19.9, 5.0 Hz); <sup>31</sup>P NMR (162 MHz, CDCl<sub>3</sub>) δ: -7.59; HRMS (ESI) calcd. for C<sub>19</sub>H<sub>25</sub>N<sub>3</sub>O<sub>6</sub>P [M+H]<sup>+</sup>: 422.1475, found: 422.1484.

**Diisopropyl (2-benzoyl-1-(3,5-dimethylphenyl)hydrazinyl)phosphonate (3i).** White solid; mp: 161-162 °C; <sup>1</sup>H NMR (400 MHz, CDCl<sub>3</sub>) δ: 9.04 (s, 1H), 7.89 (d, *J* = 7.2 Hz, 2H), 7.49 (t, *J* = 7.3 Hz, 1H), 7.39 (t, *J* = 7.4 Hz, 2H), 6.97 (s, 2H), 6.68 (s, 1H), 4.88 (dd, *J* = 12.5, 6.1 Hz, 2H), 2.26 (s, 6H), 1.35 (d, *J* = 6.1 Hz, 6H), 1.24 (d, *J* = 6.1 Hz, 6H); <sup>13</sup>C NMR (100 MHz, CDCl<sub>3</sub>) δ: 167.0, 143.0 (d, *J* = 12.5 Hz), 138.2, 132.4, 131.8, 130.0, 128.3, 127.7, 125.4, 117.0, 73.0 (d, *J* = 5.5 Hz), 23.8 (d, *J* = 3.5 Hz), 23.6 (d, *J* = 6.2 Hz), 21.5; <sup>31</sup>P NMR (162 MHz, CDCl<sub>3</sub>) δ: -0.41; HRMS (ESI) calcd. for C<sub>21</sub>H<sub>30</sub>N<sub>2</sub>O<sub>4</sub>P [M+H]<sup>+</sup>: 405.1938, found: 405.1942.

**Diisopropyl (2-benzoyl-1-(6-chloropyridin-2-yl)hydrazinyl)phosphonate (3j).** White solid; mp: 120-122 °C; <sup>1</sup>H NMR (400 MHz, CDCl<sub>3</sub>) δ: 9.34 (s, 1H), 7.93-7.88 (m, 2H), 7.56-7.48 (m, 2H), 7.44-7.36 (m, 2H), 7.15 (d, *J* = 8.2 Hz, 1H), 6.93 (t, *J* = 7.2 Hz, 1H), 5.05-4.94 (m, 2H), 1.36 (d, *J* = 6.1 Hz, 6H), 1.28 (d, *J* = 5.7 Hz, 6H); <sup>13</sup>C NMR (100 MHz, CDCl<sub>3</sub>) δ: 167.1, 155.5, 155.4, 148.6, 140.2, 132.0, 128.4, 127.8, 117.7, 108.9, 74.0, 24.4-23.4 (m); <sup>31</sup>P NMR (162 MHz, CDCl<sub>3</sub>) δ: -2.63; HRMS (ESI) calcd. for C<sub>18</sub>H<sub>24</sub>ClN<sub>3</sub>O<sub>4</sub>P [M+H]<sup>+</sup>: 412.1187, found: 412.1202.

**Diisopropyl (2-(4-methoxybenzoyl)-1-phenylhydrazinyl)phosphonate (3l).** White solid; mp: 181-182 °C; <sup>1</sup>H NMR (400 MHz, CDCl<sub>3</sub>) δ: 9.26 (s, 1H), 7.86 (d, *J* = 8.8 Hz, 2H), 7.33 (d, *J* = 7.9 Hz, 2H), 7.29-7.22 (m, 2H), 7.02 (t, *J* = 7.3 Hz, 1H), 6.84 (d, *J* = 8.8 Hz, 2H), 4.90 (d, *J* = 6.0 Hz, 2H), 3.83 (s, 3H), 1.34 (d, *J* = 6.1 Hz, 6H), 1.22 (d, *J* = 6.0 Hz, 6H); <sup>13</sup>C NMR (100 MHz, CDCl<sub>3</sub>) δ: 166.6, 162.4, 143.2 (d, *J* = 13.0 Hz), 129.6, 128.7, 124.5, 123.2, 118.7 (d, *J* = 2.3 Hz), 113.5, 73.0 (d, *J* = 5.5 Hz), 55.4, 23.8 (d, *J* = 3.7 Hz), 23.6 (d, *J* = 6.1 Hz); <sup>31</sup>P NMR (162 MHz, CDCl<sub>3</sub>) δ: 0.14; HRMS (ESI) calcd. for C<sub>20</sub>H<sub>28</sub>N<sub>2</sub>O<sub>5</sub>P [M+H]<sup>+</sup>: 407.1730, found: 407.1735.

**Diisopropyl (2-(4-hydroxybenzoyl)-1-phenylhydrazinyl)phosphonate (3m).** White solid; mp: 180-182 °C; <sup>1</sup>H NMR (400 MHz, DMSO-*d*<sub>6</sub>) δ: 10.64 (s, 1H), 10.16 (s, 1H), 7.82 (d, *J* = 8.6 Hz, 2H), 7.28 (t, *J* = 7.8 Hz, 2H), 7.19 (d, *J* = 8.1 Hz, 2H), 6.97 (t, *J* = 7.2 Hz, 1H), 6.87 (d, *J* = 8.6 Hz, 2H), 4.95 (d, *J* = 5.3 Hz, 1H), 4.69 (d, *J* = 5.7 Hz, 1H), 1.24-1.29 (m, 6H), 1.16-1.07 (m, 6H); <sup>13</sup>C NMR (100 MHz, DMSO-*d*<sub>6</sub>) δ: 166.4, 161.3, 144.0 (d, *J* = 13.9 Hz), 130.1, 128.9, 123.5, 122.4, 117.3, 115.4, 71.9, 71.7, 23.9 (d, *J* = 32.7 Hz), 23.4-23.3 (m); <sup>31</sup>P NMR (162 MHz, DMSO-*d*<sub>6</sub>) δ: -0.97; HRMS (ESI) calcd. for C<sub>19</sub>H<sub>26</sub>N<sub>2</sub>O<sub>5</sub>P [M+H]<sup>+</sup>: 393.1574, found: 393.1597.

**Diisopropyl (2-(4-bromobenzoyl)-1-phenylhydrazinyl)phosphonate (3n).** White solid; mp: 176-177 °C; <sup>1</sup>H NMR (400 MHz, CDCl<sub>3</sub>) δ: 10.21 (s, 1H), 7.76 (d, *J* = 8.4 Hz, 2H), 7.41 (d, *J* = 8.3 Hz, 2H), 7.31 (d, *J* = 8.2 Hz, 2H), 7.29-7.22 (m, 2H), 7.02 (t, *J* = 7.1 Hz, 1H), 4.90 (s, 2H), 1.34 (d, *J* = 5.8 Hz, 6H), 1.22 (d, *J* = 5.4 Hz, 6H); <sup>13</sup>C NMR (100 MHz, CDCl<sub>3</sub>) δ: 166.0, 143.0 (d, *J* = 12.7 Hz), 131.3, 130.7, 129.4, 128.7, 126.6, 123.5, 118.8 (d, *J* = 2.2 Hz), 73.3 (d, *J* = 5.7 Hz), 23.7 (dd, *J* = 20.1, 4.9 Hz); <sup>31</sup>P NMR (162 MHz, CDCl<sub>3</sub>) δ: 0.29; HRMS (ESI) calcd. for C<sub>19</sub>H<sub>25</sub>BrN<sub>2</sub>O<sub>4</sub>P [M+H]<sup>+</sup>: 455.0730, found: 455.0745.

**Diisopropyl (2-(4-aminobenzoyl)-1-phenylhydrazinyl)phosphonate (3o).** White solid; mp: 125-126 °C; <sup>1</sup>H NMR (400 MHz, DMSO-*d*<sub>6</sub>) δ: 10.39 (s, 1H), 7.67 (d, *J* = 8.6 Hz, 2H), 7.26 (t, *J* = 7.9 Hz, 2H), 7.18 (d, *J* = 8.0 Hz, 2H), 6.96 (t, *J* = 7.2 Hz, 1H), 6.59 (d, *J* = 8.6 Hz, 2H), 5.76 (s, 2H), 4.94 (s, 1H), 4.69 (s, 1H), 1.27 (d, *J* = 6.0 Hz, 6H), 1.11 (d, *J* = 7.4 Hz, 6H); <sup>13</sup>C NMR (100 MHz, DMSO-*d*<sub>6</sub>) δ: 166.5, 152.9, 144.2 (d, *J* = 14.4 Hz), 129.8, 128.9, 122.3, 119.2, 117.3, 113.0, 71.9, 71.6, 24.2, 23.8; <sup>31</sup>P NMR (162 MHz, DMSO-*d*<sub>6</sub>) δ: -0.51; HRMS (ESI) calcd. for C<sub>19</sub>H<sub>27</sub>N<sub>3</sub>O<sub>4</sub>P [M+H]<sup>+</sup>: 392.1734, found: 392.1732.

**Diisopropyl (2-(4-nitrobenzoyl)-1-phenylhydrazinyl)phosphonate (3p).** Yellow solid; mp: 169-170 °C; <sup>1</sup>H NMR (400 MHz, CDCl<sub>3</sub>) δ: 10.70 (s, 1H), 8.10-8.03 (m, 4H), 7.34-7.24 (m, 4H), 7.05 (t, *J* = 7.1 Hz, 1H), 4.91 (d, *J* = 5.5 Hz, 2H), 1.36 (d, *J* = 5.9 Hz, 6H), 1.24 (d, *J* = 5.7 Hz, 6H); <sup>13</sup>C NMR (100 MHz, CDCl<sub>3</sub>) δ: 164.8, 149.6, 142.7 (d, *J* = 12.4 Hz), 137.3, 129.0, 128.8, 123.8, 123.2, 118.9 (d, *J* = 2.1 Hz), 73.6 (d, *J* = 5.9 Hz), 23.7 (m); <sup>31</sup>P NMR (162 MHz, CDCl<sub>3</sub>) δ: 0.11; HRMS (ESI) calcd. for C<sub>19</sub>H<sub>25</sub>N<sub>3</sub>O<sub>6</sub>P [M+H]<sup>+</sup>: 422.1475, found: 422.1479.

**Diisopropyl (2-(3-nitrobenzoyl)-1-phenylhydrazinyl)phosphonate (3q).** Yellow solid; <sup>1</sup>H NMR

(400 MHz, CDCl<sub>3</sub>)  $\delta$ : 10.98 (s, 1H), 8.72 (s, 1H), 8.25 (d,  $J = 7.7$  Hz, 1H), 8.20 (d,  $J = 8.1$  Hz, 1H), 7.42 (t,  $J = 8.0$  Hz, 1H), 7.32 (d,  $J = 8.2$  Hz, 2H), 7.29-7.22 (m, 2H), 7.03 (t,  $J = 7.2$  Hz, 1H), 4.94 (s, 2H), 1.37 (t,  $J = 7.7$  Hz, 6H), 1.25 (d,  $J = 16.9$  Hz, 6H); <sup>13</sup>C NMR (100 MHz, CDCl<sub>3</sub>)  $\delta$ : 164.7, 148.1, 142.4 (d,  $J = 12.5$  Hz), 133.6, 133.5, 129.5, 128.9, 126.5, 124.1, 122.8, 119.1, 119.1, 74.1 (d,  $J = 5.9$  Hz), 23.8 (d,  $J = 3.7$  Hz), 23.5 (d,  $J = 5.9$  Hz); <sup>31</sup>P NMR (162 MHz, CDCl<sub>3</sub>)  $\delta$ : -0.10; HRMS (ESI) calcd. for C<sub>19</sub>H<sub>24</sub>N<sub>3</sub>O<sub>6</sub>PNa [M+Na]<sup>+</sup>: 444.1295, found: 444.1282.

**Diisopropyl (2-(2-bromobenzoyl)-1-phenylhydrazinyl)phosphonate (3r).** White solid; mp: 96-98 °C; <sup>1</sup>H NMR (400 MHz, CDCl<sub>3</sub>)  $\delta$ : 7.91 (s, 1H), 7.69 (d,  $J = 7.2$  Hz, 1H), 7.64 (d,  $J = 7.8$  Hz, 1H), 7.41 (dd,  $J = 14.9, 7.8$  Hz, 3H), 7.33 (dd,  $J = 12.7, 7.0$  Hz, 3H), 7.08 (t,  $J = 7.3$  Hz, 1H), 4.89 (dd,  $J = 12.1, 6.0$  Hz, 2H), 1.39 (t,  $J = 7.0$  Hz, 6H), 1.25 (d,  $J = 6.1$  Hz, 6H); <sup>13</sup>C NMR (100 MHz, CDCl<sub>3</sub>)  $\delta$ : 167.4, 142.6 (d,  $J = 11.9$  Hz), 135.7, 133.4, 131.8, 130.0, 128.8, 127.5, 123.5, 119.9, 118.7, 73.1 (d,  $J = 5.0$  Hz), 23.9 (d,  $J = 3.1$  Hz), 23.6 (d,  $J = 5.8$  Hz); <sup>31</sup>P NMR (162 MHz, CDCl<sub>3</sub>)  $\delta$ : -0.44; HRMS (ESI) calcd. for C<sub>19</sub>H<sub>25</sub>BrN<sub>2</sub>O<sub>4</sub>P [M+H]<sup>+</sup>: 455.0730, found: 455.0742.

**Diisopropyl (2-acetyl-1-phenylhydrazinyl)phosphonate (3s).** White solid; mp: 123-125 °C; <sup>1</sup>H NMR (400 MHz, CDCl<sub>3</sub>)  $\delta$ : 8.94 (s, 0.80H), 7.80 (s, 0.20H), 7.33 (dt,  $J = 15.8, 8.1$  Hz, 1H), 7.28-7.23 (m, 4H), 7.12 (t,  $J = 6.8$  Hz, 0.23H), 7.02 (m, 0.81H), 4.83 (s, 1.54H), 4.71 (m, 0.46H), 2.09 (s, 2.35H), 2.05 (s, 0.65H), 1.34 (dd,  $J = 10.5, 6.2$  Hz, 6H), 1.26 (d,  $J = 6.1$  Hz, 1.18H), 1.18 (d,  $J = 6.1$  Hz, 4.86H); <sup>13</sup>C NMR (100 MHz, CDCl<sub>3</sub>)  $\delta$ : 170.2, 142.8 (d,  $J = 12.7$  Hz), 129.0, 128.7, 124.5, 123.2, 120.0, 118.2, 73.1, 23.8, 23.5 (d,  $J = 6.2$  Hz), 20.9; <sup>31</sup>P NMR (162 MHz, CDCl<sub>3</sub>)  $\delta$ : 0.43; HRMS (ESI) calcd. for C<sub>14</sub>H<sub>23</sub>N<sub>2</sub>O<sub>4</sub>PNa [M+Na]<sup>+</sup>: 337.1288, found: 337.1272.

**tert-Butyl 2-(diisopropoxyphosphoryl)-2-phenylhydrazinecarboxylate (3t).** White solid; mp: 105-107 °C; <sup>1</sup>H NMR (400 MHz, CDCl<sub>3</sub>)  $\delta$ : 7.33-7.24 (m, 4H), 7.03 (t,  $J = 6.5$  Hz, 1H), 6.77 (s, 1H), 4.87-4.71 (m, 2H), 1.47 (d,  $J = 16.8$  Hz, 9H), 1.37 (d,  $J = 6.2$  Hz, 6H), 1.21 (d,  $J = 6.1$  Hz, 6H); <sup>13</sup>C NMR (100 MHz, CDCl<sub>3</sub>)  $\delta$ : 155.5, 143.6, 128.7, 123.3, 118.5, 81.3, 72.6, 28.2, 23.5-23.8 (m), 23.5; <sup>31</sup>P NMR (162 MHz, MeOD)  $\delta$ : -0.13; HRMS (ESI) calcd. for C<sub>17</sub>H<sub>29</sub>N<sub>2</sub>O<sub>5</sub>PNa [M+Na]<sup>+</sup>: 395.1706, found: 395.1722.

**tert-Butyl 2-(diisopropoxyphosphoryl)-2-(4-fluorophenyl)hydrazinecarboxylate (3u).** White solid; mp: 81-83 °C; <sup>1</sup>H NMR (400 MHz, CDCl<sub>3</sub>)  $\delta$ : 7.33-7.24 (m, 2H), 6.97 (t,  $J = 8.6$  Hz, 2H), 6.67 (s, 1H), 4.78 (s, 2H), 1.48 (s, 9H), 1.36 (d,  $J = 6.1$  Hz, 6H), 1.23 (d,  $J = 6.0$  Hz, 6H); <sup>13</sup>C NMR (100 MHz, CDCl<sub>3</sub>)  $\delta$ : 155.4, 139.5, 121.2, 115.5, 115.3, 81.5, 72.5, 28.2, 23.8 (d,  $J = 3.5$  Hz), 23.6 (d,  $J = 5.1$  Hz); <sup>31</sup>P NMR (162 MHz, MeOD)  $\delta$ : -0.44; HRMS (ESI) calcd. for C<sub>17</sub>H<sub>28</sub>FN<sub>2</sub>O<sub>5</sub>PNa [M+Na]<sup>+</sup>: 413.1612, found: 413.1625.

**tert-Butyl 2-(4-chlorophenyl)-2-(diisopropoxyphosphoryl)hydrazinecarboxylate (3v).** White solid; mp: 75-76 °C; <sup>1</sup>H NMR (400 MHz, CDCl<sub>3</sub>)  $\delta$ : 7.26 (s, 1H), 7.24 (s, 3H), 6.63 (s, 1H), 4.79 (s, 2H), 1.49 (s, 9H), 1.37 (d,  $J = 6.2$  Hz, 6H), 1.23 (d,  $J = 6.2$  Hz, 6H); <sup>13</sup>C NMR (100 MHz, CDCl<sub>3</sub>)  $\delta$ : 155.3, 128.7, 119.4, 100.0, 81.3, 73.0, 28.2, 23.6-23.8 (m); <sup>31</sup>P NMR (162 MHz, MeOD)  $\delta$ : -1.60; HRMS (ESI) calcd. for C<sub>17</sub>H<sub>28</sub>ClN<sub>2</sub>O<sub>5</sub>PNa [M+Na]<sup>+</sup>: 429.1317, found: 429.1325.

**tert-Butyl 2-(4-bromophenyl)-2-(diisopropoxyphosphoryl)hydrazinecarboxylate (3w).** Brown solid; <sup>1</sup>H NMR (400 MHz, CDCl<sub>3</sub>)  $\delta$ : 7.38 (d,  $J = 8.9$  Hz, 2H), 7.20 (t,  $J = 5.9$  Hz, 2H), 6.61 (s, 1H), 4.78 (s, 2H), 1.49 (s, 9H), 1.37 (d,  $J = 6.2$  Hz, 6H), 1.23 (d,  $J = 6.1$  Hz, 6H); <sup>13</sup>C NMR (100 MHz, DMSO-*d*<sub>6</sub>)  $\delta$ : 143.4, 131.0, 122.2, 115.7, 113.6, 73.0 (d,  $J = 5.4$  Hz), 70.3 (d,  $J = 4.9$  Hz),

26.5, 21.9 (d,  $J = 17.7$  Hz);  $^{31}\text{P}$  NMR (162 MHz,  $\text{CDCl}_3$ )  $\delta$ : -1.59; HRMS (ESI) calcd. for  $\text{C}_{17}\text{H}_{28}\text{BrN}_2\text{O}_5\text{PNa}$   $[\text{M}+\text{Na}]^+$ : 473.0811, found: 473.0835.

***tert-Butyl 2-(diisopropoxyphosphoryl)-2-(3,5-dimethylphenyl)hydrazinecarboxylate (3x)***. White solid; mp: 91-94 °C;  $^1\text{H}$  NMR (400 MHz,  $\text{CDCl}_3$ )  $\delta$ : 6.93 (s, 2H), 6.69 (s, 1H), 6.59 (s, 1H), 4.79 (s, 2H), 2.28 (s, 6H), 1.49 (s, 9H), 1.37 (d,  $J = 6.1$  Hz, 6H), 1.24 (t,  $J = 6.4$  Hz, 6H);  $^{13}\text{C}$  NMR (100 MHz,  $\text{CDCl}_3$ )  $\delta$ : 155.4, 143.3 (d,  $J = 13.0$  Hz), 138.3, 125.2, 116.5, 81.3, 72.6, 28.2, 23.9, 23.7 (dd,  $J = 25.5, 4.9$  Hz), 21.5;  $^{31}\text{P}$  NMR (162 MHz, MeOD)  $\delta$ : -0.55; HRMS (ESI) calcd. for  $\text{C}_{19}\text{H}_{33}\text{N}_2\text{O}_5\text{PNa}$   $[\text{M}+\text{Na}]^+$ : 423.2019, found: 423.2030.

***Diethyl (2-benzoyl-1-phenylhydrazinyl)phosphonate (3y)***. White solid; mp: 140-141 °C;  $^1\text{H}$  NMR (400 MHz,  $\text{CDCl}_3$ )  $\delta$ : 9.81 (s, 1H), 7.89-7.81 (m, 2H), 7.44 (t,  $J = 7.4$  Hz, 1H), 7.36 (d,  $J = 7.9$  Hz, 2H), 7.31 (dd,  $J = 12.4, 4.8$  Hz, 2H), 7.26 (t,  $J = 4.1$  Hz, 2H), 7.05 (t,  $J = 7.3$  Hz, 1H), 4.31-4.20 (m, 4H), 1.26 (t,  $J = 6.9$  Hz, 6H);  $^{13}\text{C}$  NMR (100 MHz,  $\text{CDCl}_3$ )  $\delta$ : 166.9, 142.9 (d,  $J = 12.9$  Hz), 132.0, 131.9, 128.9, 128.3, 127.6, 123.8, 119.2 (d,  $J = 2.1$  Hz), 64.1 (d,  $J = 5.4$  Hz), 16.0 (d,  $J = 7.4$  Hz);  $^{31}\text{P}$  NMR (162 MHz,  $\text{CDCl}_3$ )  $\delta$ : 2.43; HRMS (ESI) calcd. for  $\text{C}_{17}\text{H}_{21}\text{N}_2\text{O}_4\text{PNa}$   $[\text{M}+\text{Na}]^+$ : 371.1131, found: 371.1144.

***Diisopropyl (1-phenylhydrazinyl)phosphonate (4)***. Brown oil;  $^1\text{H}$  NMR (400 MHz,  $\text{CDCl}_3$ )  $\delta$ : 7.48 (d,  $J = 8.1$  Hz, 2H), 7.32-7.24 (m, 2H), 7.02 (t,  $J = 7.3$  Hz, 1H), 4.68 (dq,  $J = 12.5, 6.2$  Hz, 2H), 4.56-4.17 (m, 2H), 1.37 (d,  $J = 6.0$  Hz, 6H), 1.24 (d,  $J = 6.1$  Hz, 6H);  $^{13}\text{C}$  NMR (100 MHz,  $\text{CDCl}_3$ )  $\delta$ : 145.1 (d,  $J = 13.2$  Hz), 128.6, 122.7, 119.3 (d,  $J = 2.5$  Hz), 72.1 (d,  $J = 5.7$  Hz), 23.7 (dd,  $J = 24.8, 4.8$  Hz);  $^{31}\text{P}$  NMR (162 MHz,  $\text{CDCl}_3$ )  $\delta$ : -2.68; HRMS (ESI) calcd. for  $\text{C}_{12}\text{H}_{22}\text{N}_2\text{O}_3\text{P}$   $[\text{M}+\text{H}]^+$ : 273.1363, found: 273.1368.

#### 4. X-ray structure of 3t

The single crystal of **3t** was prepared from hexane.

---

|                                   |                                                                 |                  |
|-----------------------------------|-----------------------------------------------------------------|------------------|
| Identification code               | zjq-150203-4                                                    |                  |
| Empirical formula                 | C <sub>17</sub> H <sub>29</sub> N <sub>2</sub> O <sub>5</sub> P |                  |
| Formula weight                    | 372.40                                                          |                  |
| Temperature                       | 100 K                                                           |                  |
| Wavelength                        | 1.54184 Å                                                       |                  |
| Crystal system                    | Triclinic                                                       |                  |
| Space group                       | P -1                                                            |                  |
| Unit cell dimensions              | a = 9.7307 (6) Å                                                | α = 68.269 (5)°. |
|                                   | b = 10.8147 (5) Å                                               | β = 72.364 (6)°. |
|                                   | c = 11.1682 (8) Å                                               | γ = 69.847 (5)°. |
| Volume                            | 1003.97 (11) Å <sup>3</sup>                                     |                  |
| Z                                 | 2                                                               |                  |
| μ                                 | 1.453 mm <sup>-1</sup>                                          |                  |
| F(000)                            | 401.9                                                           |                  |
| Crystal size                      | 0.2×0.05×0.05 mm <sup>3</sup>                                   |                  |
| Theta range for data collection   | 8.7 to 143.2°                                                   |                  |
| Index ranges                      | -10 ≤ h ≤ 11, -8 ≤ k ≤ 13, -13 ≤ l ≤ 13                         |                  |
| Reflections collected             | 7674                                                            |                  |
| Independent reflections           | 3778 [R <sub>int</sub> = 0.0223, R <sub>sigma</sub> = 0.0262]   |                  |
| Data / restraints / parameters    | 3778 / 0 / 232                                                  |                  |
| Goodness-of-fit on F <sup>2</sup> | 1.052                                                           |                  |
| Final R indices [I > 2sigma (I)]  | R <sub>1</sub> = 0.0326, wR <sub>2</sub> = 0.0819               |                  |
| R indices (all data)              | R <sub>1</sub> = 0.0365, wR <sub>2</sub> = 0.0854               |                  |
| Largest diff. peak and hole       | 0.39 and -0.41 e.Å <sup>-3</sup>                                |                  |

---



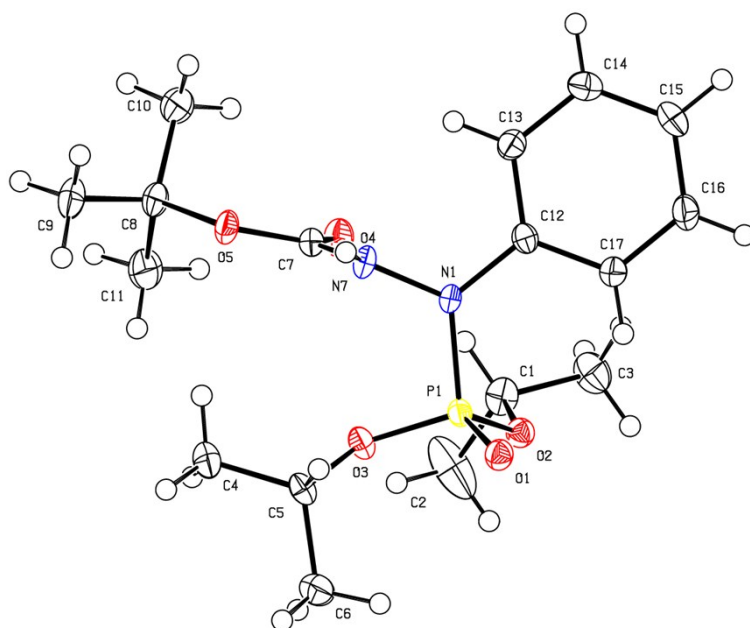

**Figure 1.** X-ray crystal structure of **3t**.

## 5. References

1. J.-Q. Zhang, G.-B. Huang, J. Weng, G. Lu and A. S. C. Chan, *Org. Biomol. Chem.*, 2015, **13**, 2055-2063.
2. (a) L. A. Carpino, P. H. Terry and P. J. Crowley, *J. Org. Chem.*, 1961, **26**, 4336-4340. (b) H. Jasch, S. B. Hoefling and M. R. Heinrich, *J. Org. Chem.*, 2012, **77**, 1520-1532.
3. S. Han, Y. Shin, S. Sharma, N. K. Mishra, J. Park, M. Kim, M. Kim, J. Jang and I. S. Kim, *Org. Lett.*, 2014, **16**, 2494-2497.

## 6. $^1\text{H}$ , $^{13}\text{C}$ and $^{31}\text{P}$ NMR spectra

### 2-Bromo- $N'$ -phenylbenzohydrazide (**1r**)

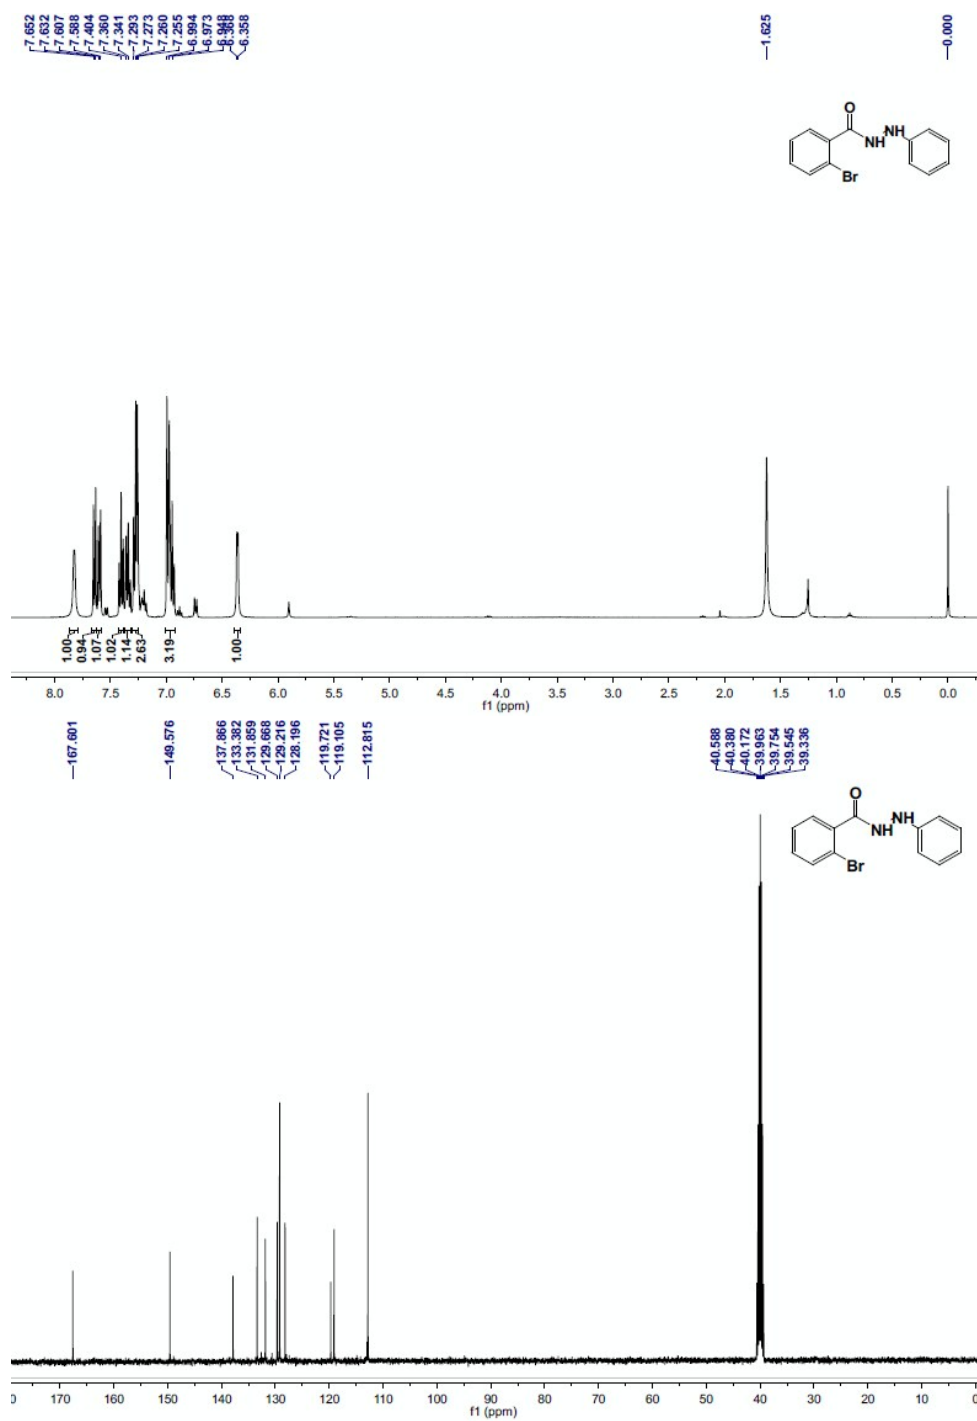

*tert*-Butyl 2-(3,5-dimethylphenyl)hydrazinecarboxylate (**1x**)

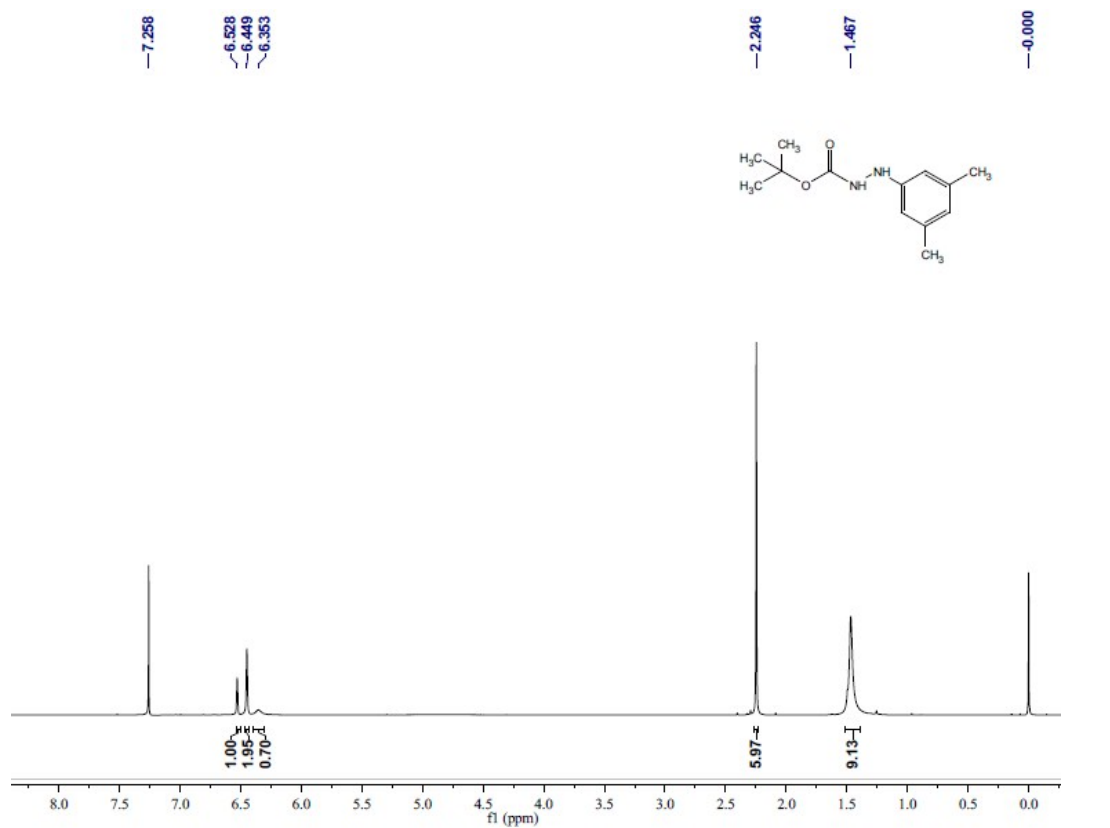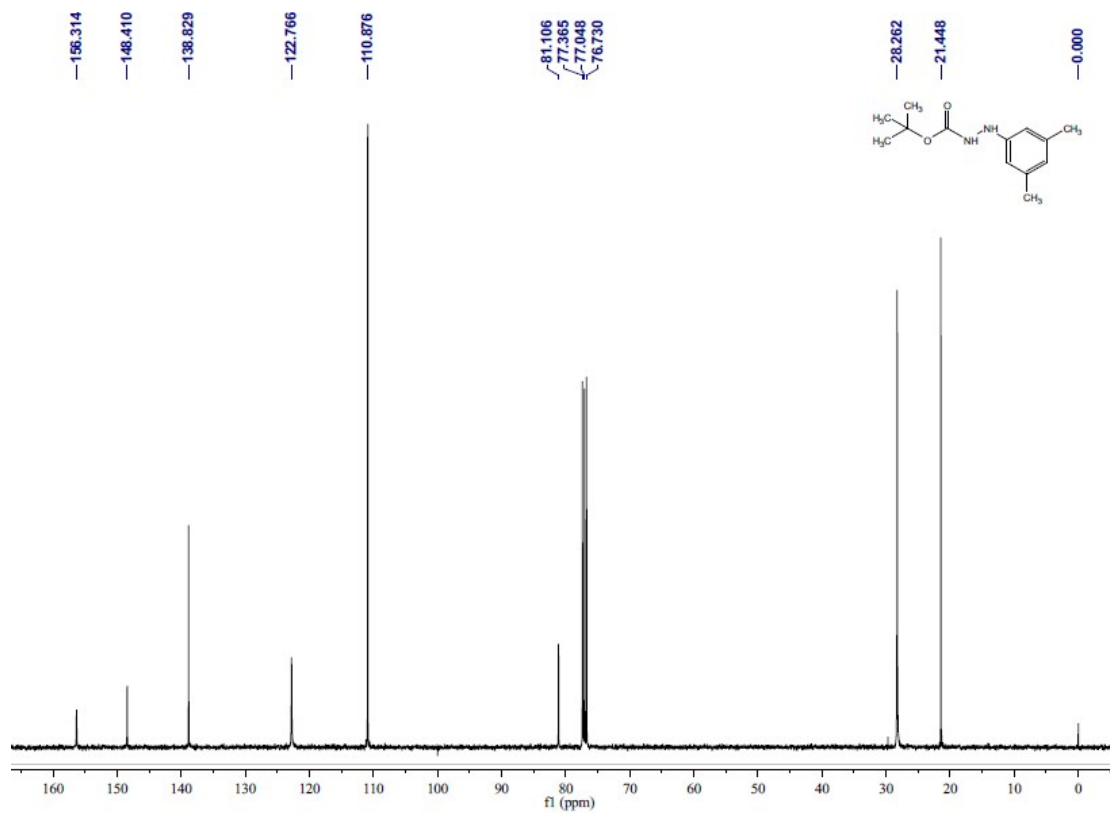

*N'*-Methyl-*N'*-phenylbenzohydrazide (**1y**)

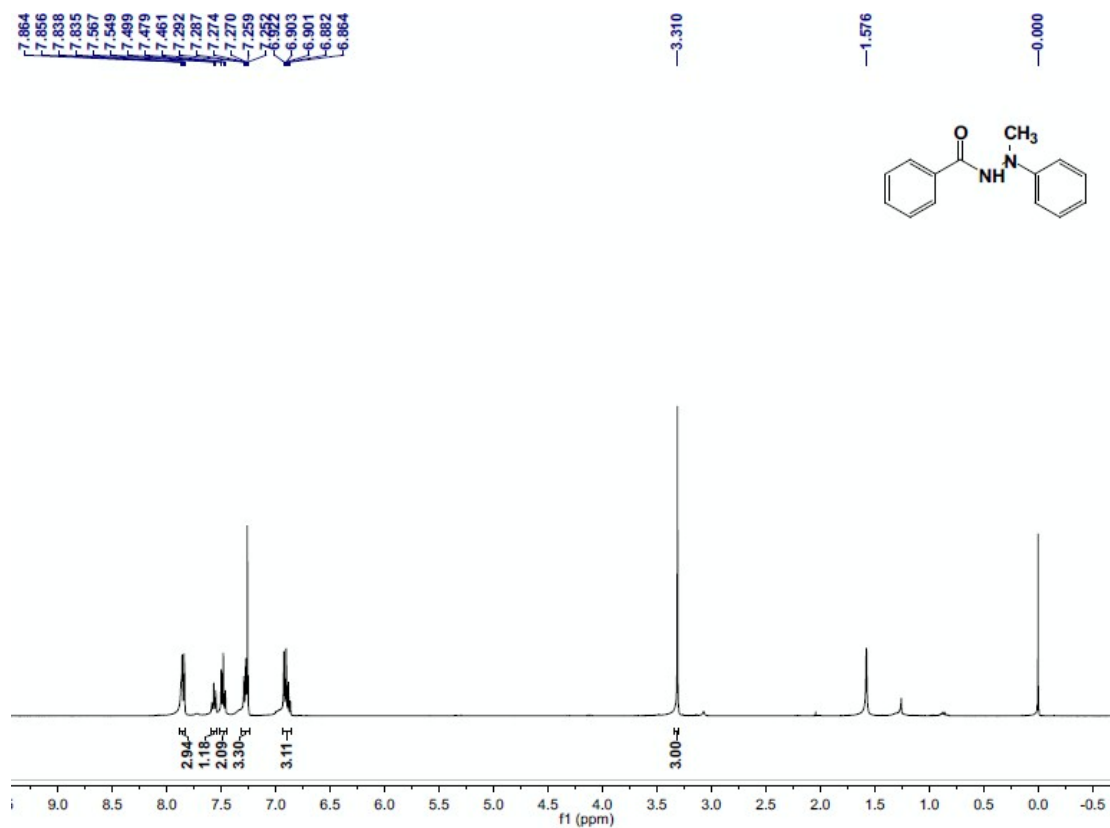

*Diisopropyl (2-benzoyl-1-phenylhydrazinyl)phosphonate (3a)*

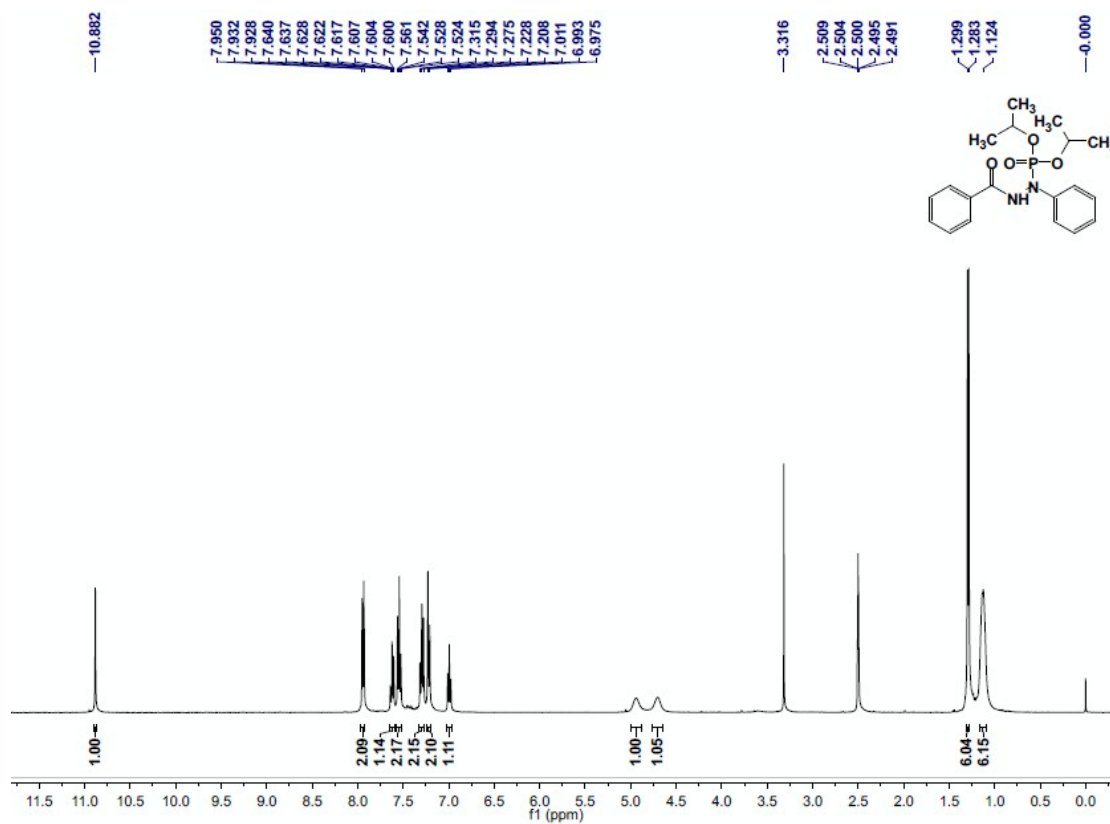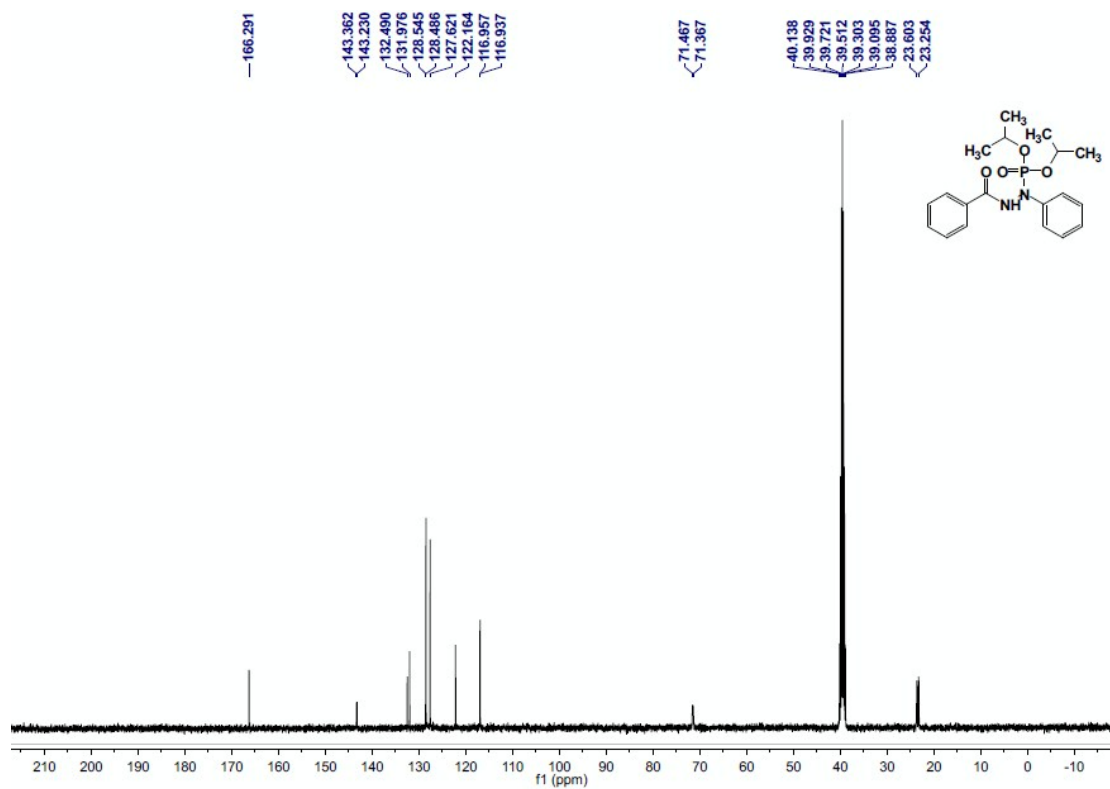

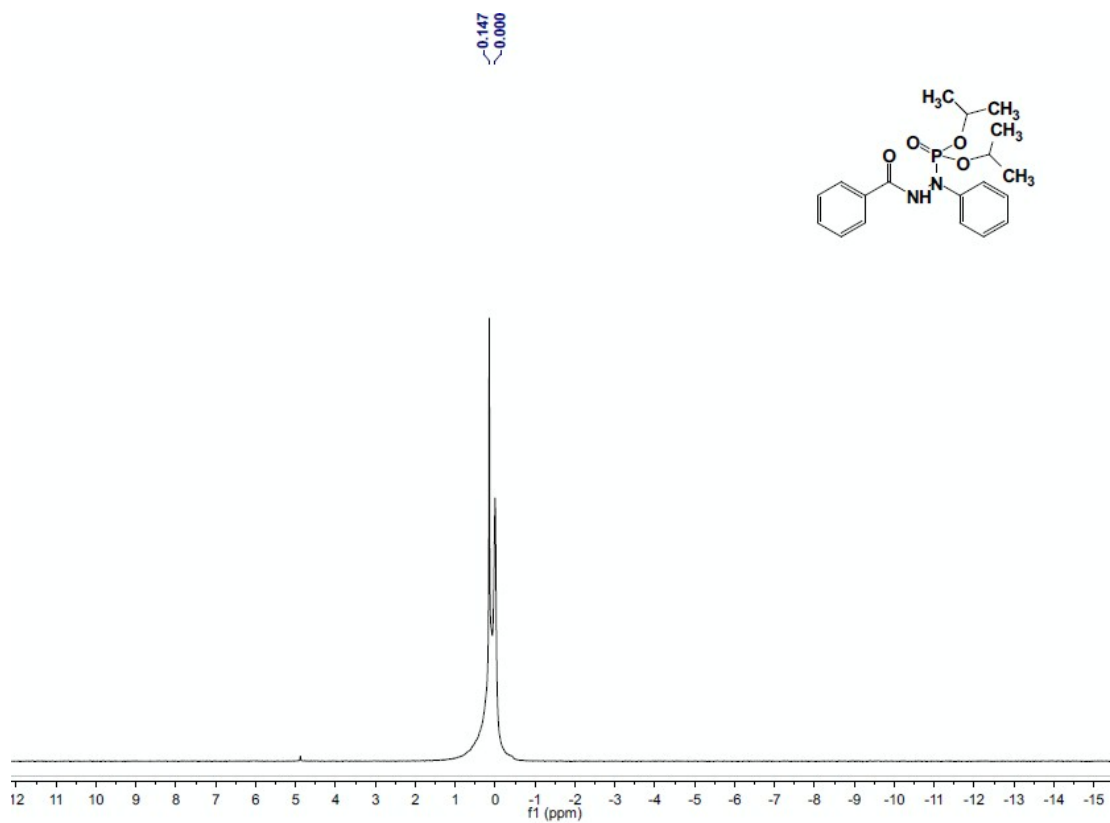

**Diisopropyl (2-benzoyl-1-(4-fluorophenyl)hydrazinyl)phosphonate (3b)**

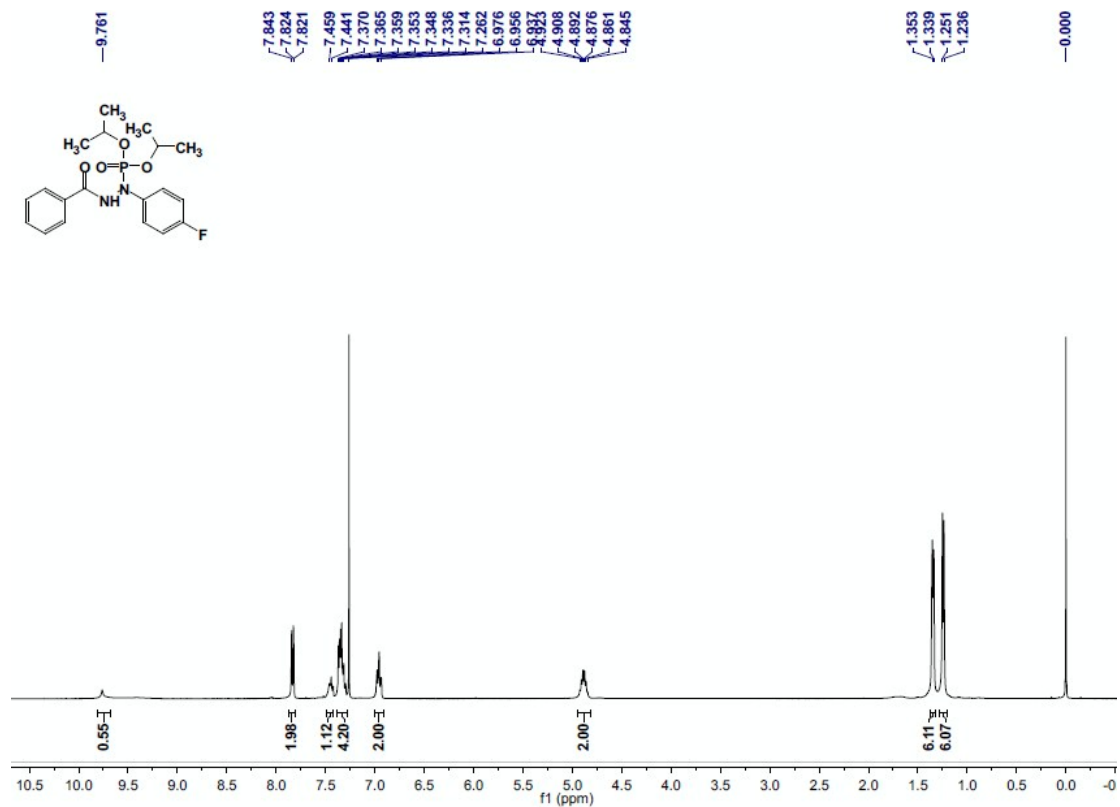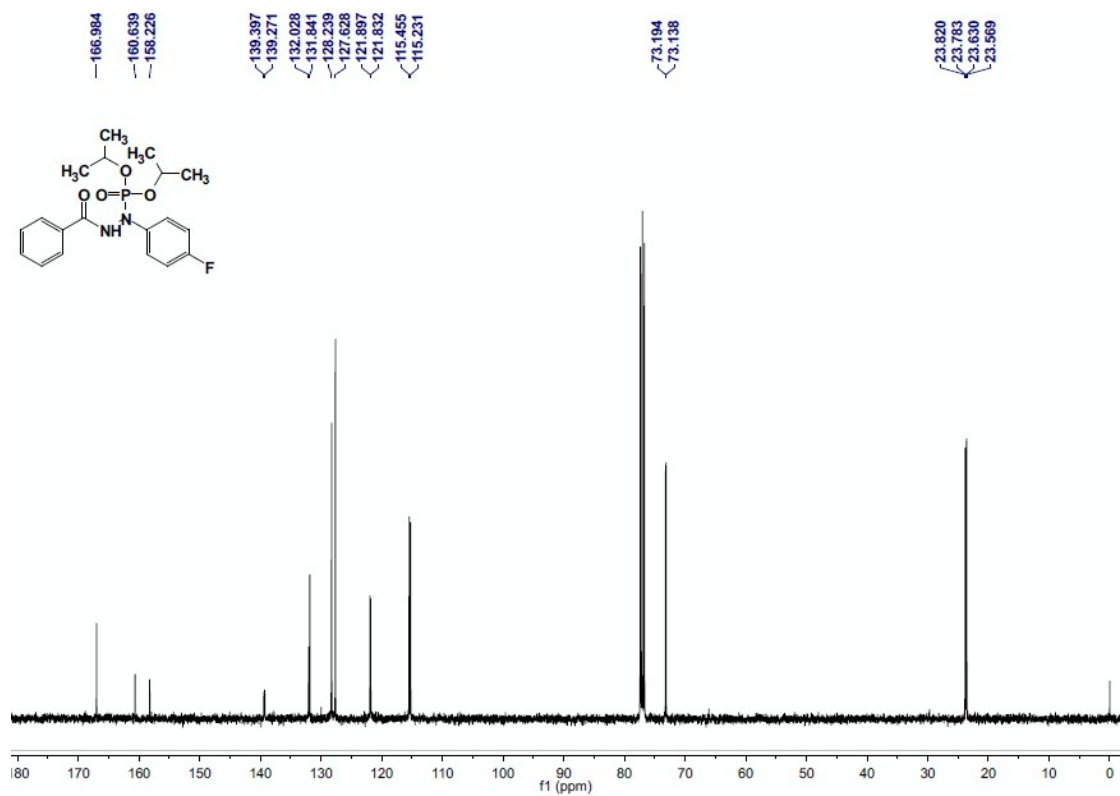

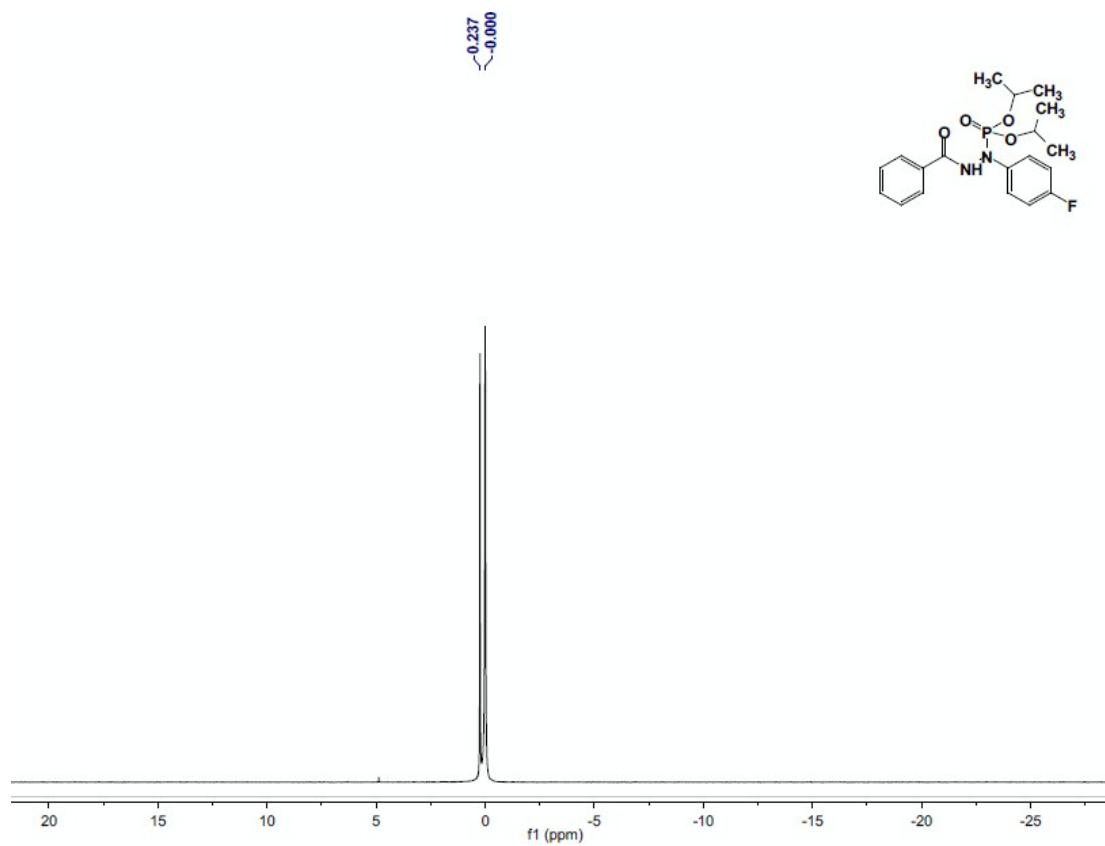



**Diisopropyl (2-benzoyl-1-(4-chlorophenyl)hydrazinyl)phosphonate (3c)**

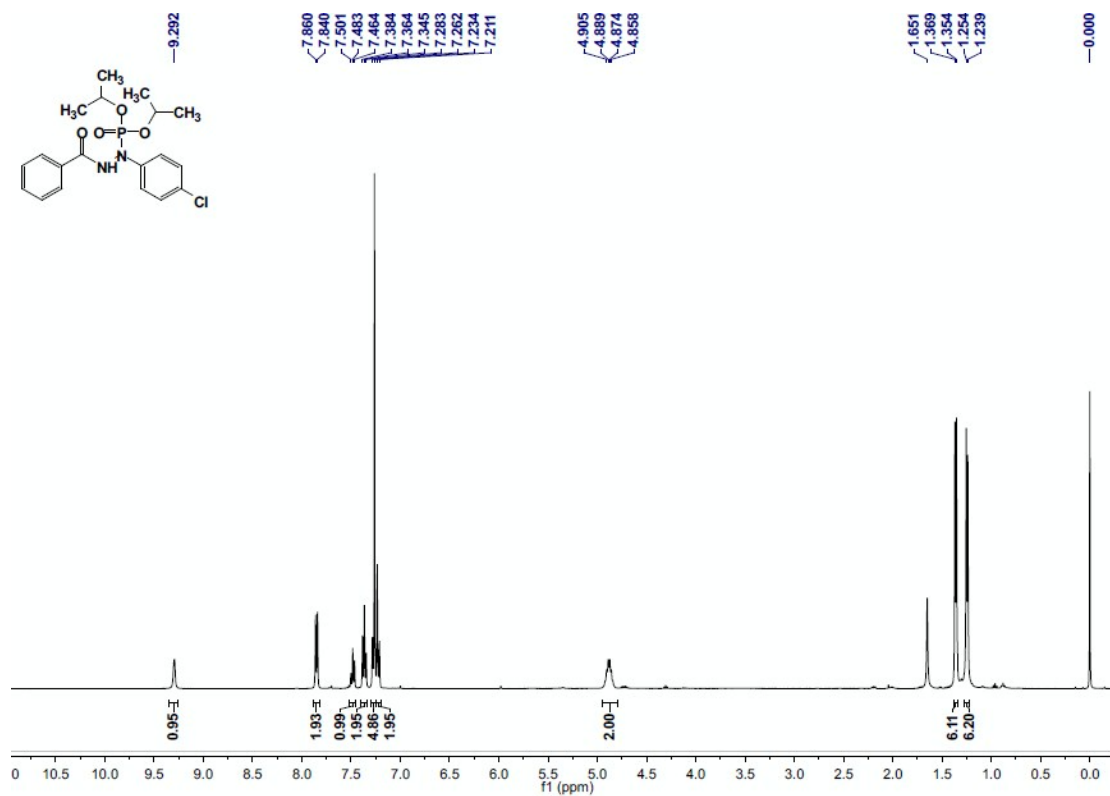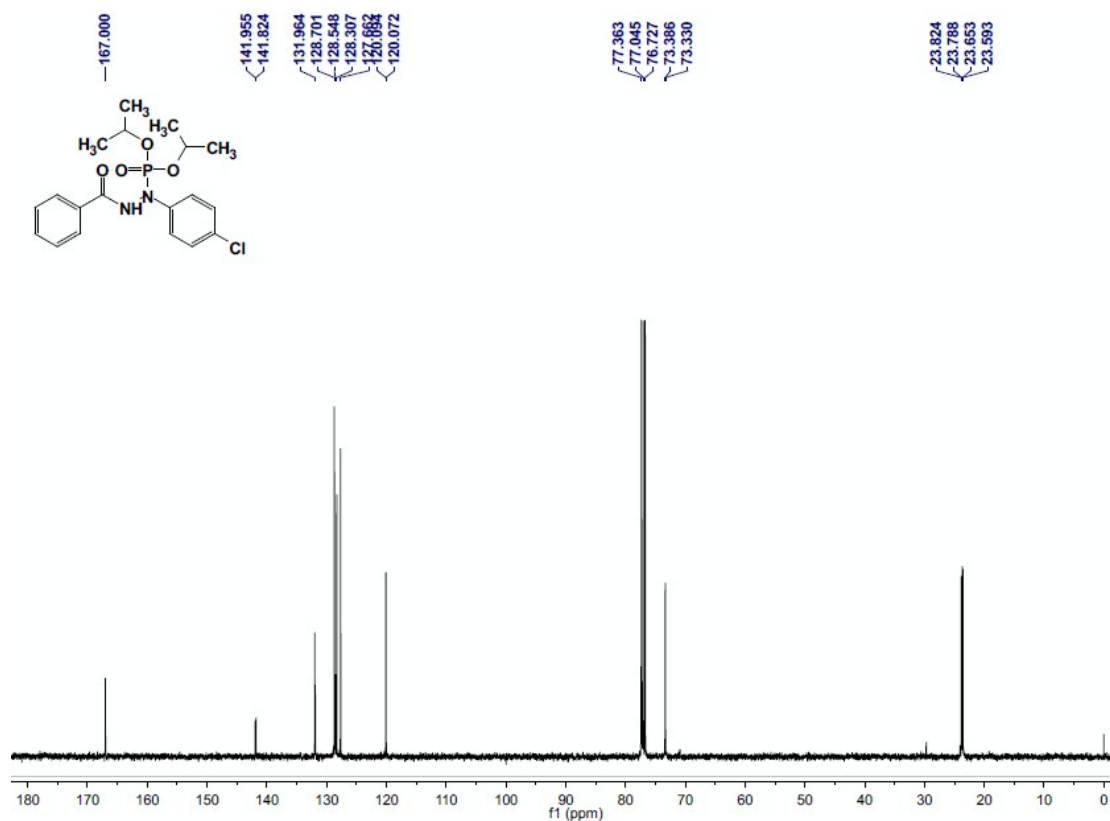

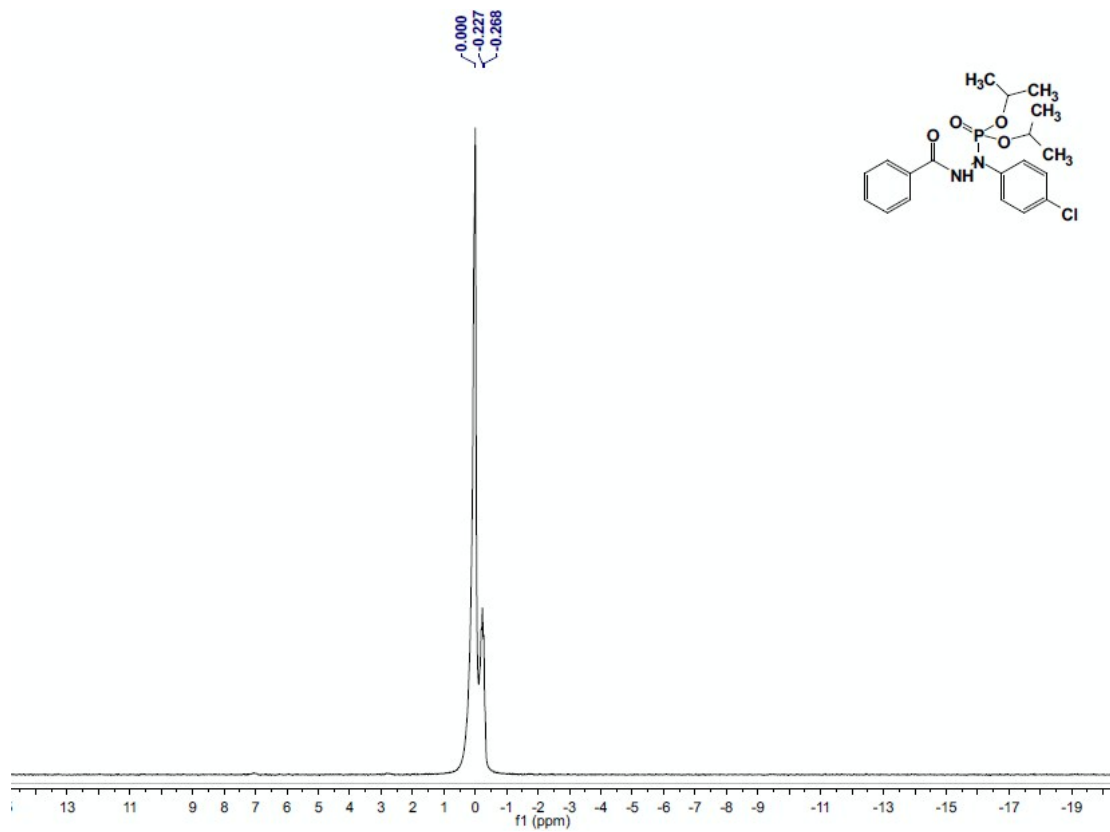

**Diisopropyl (2-benzoyl-1-(4-bromophenyl)hydrazinyl)phosphonate (3d)**

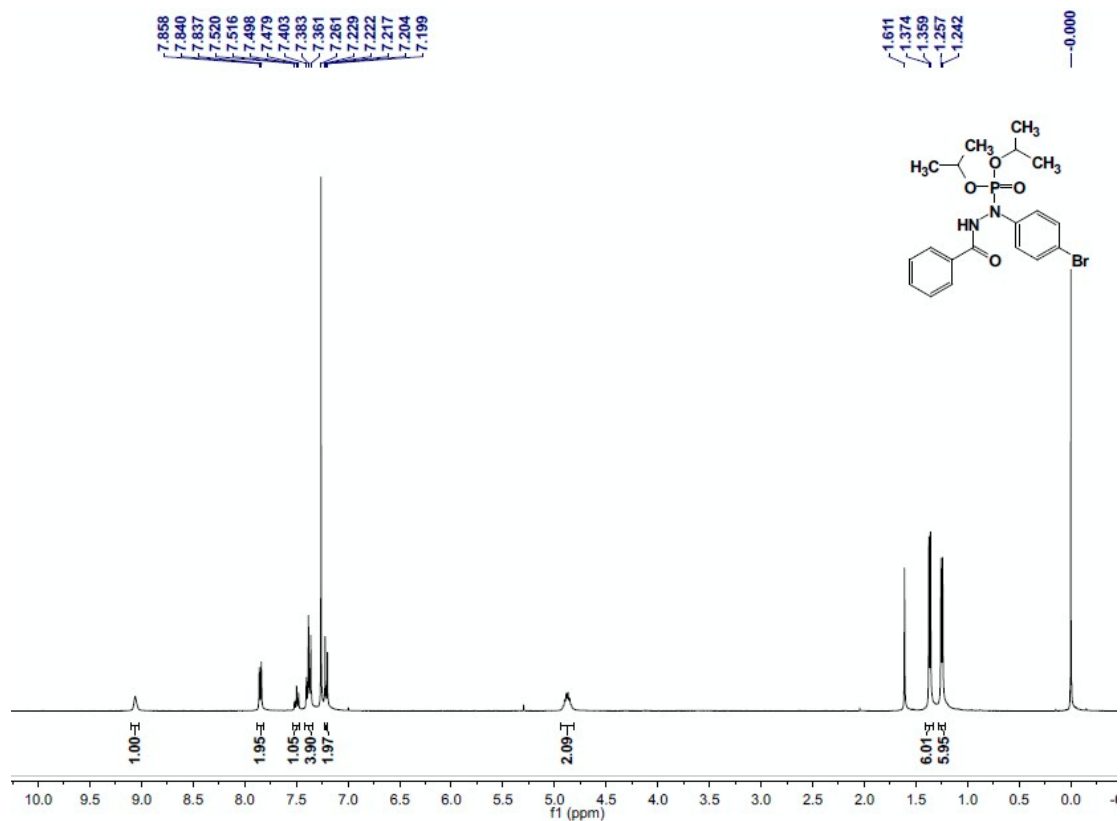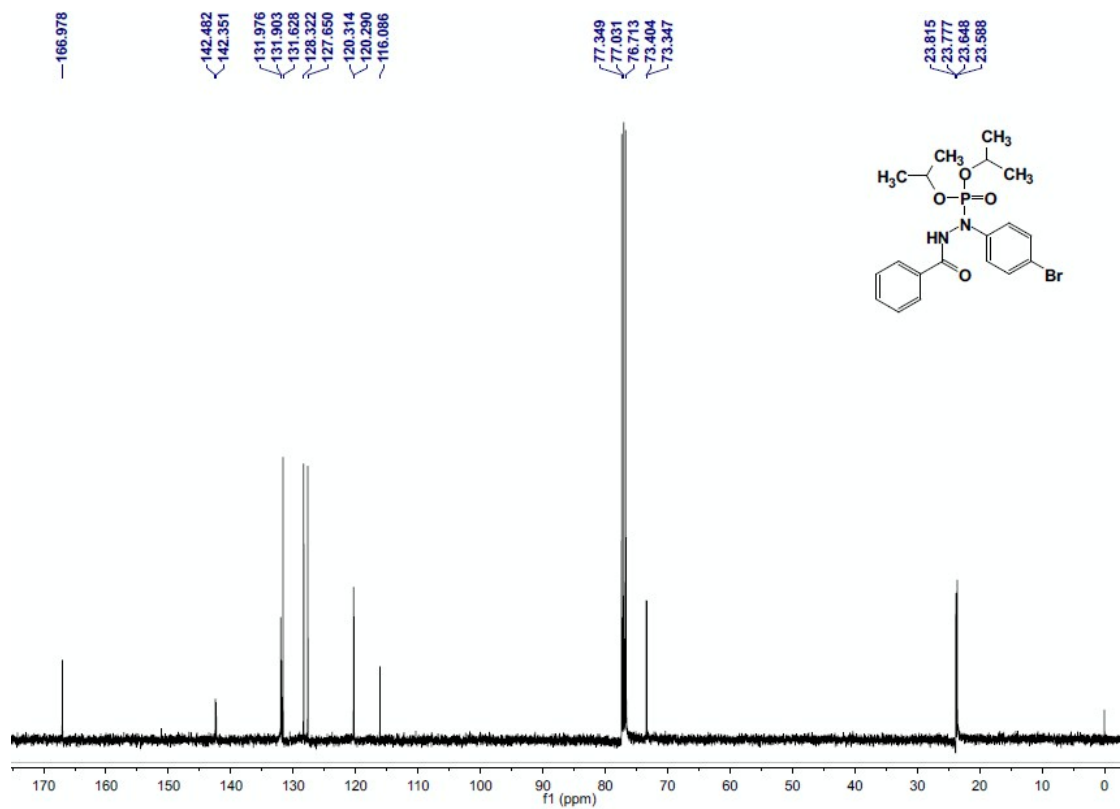

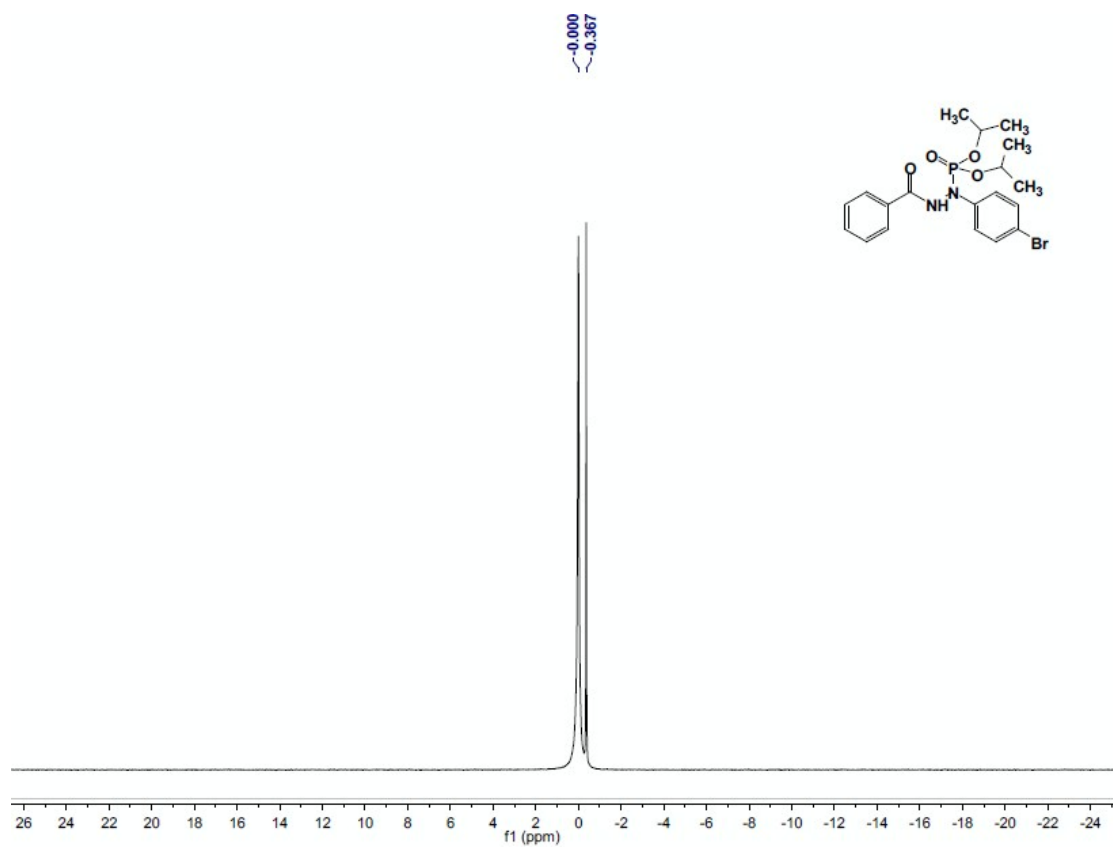

**Diisopropyl (2-benzoyl-1-(3-chlorophenyl)hydrazinyl)phosphonate (3e)**

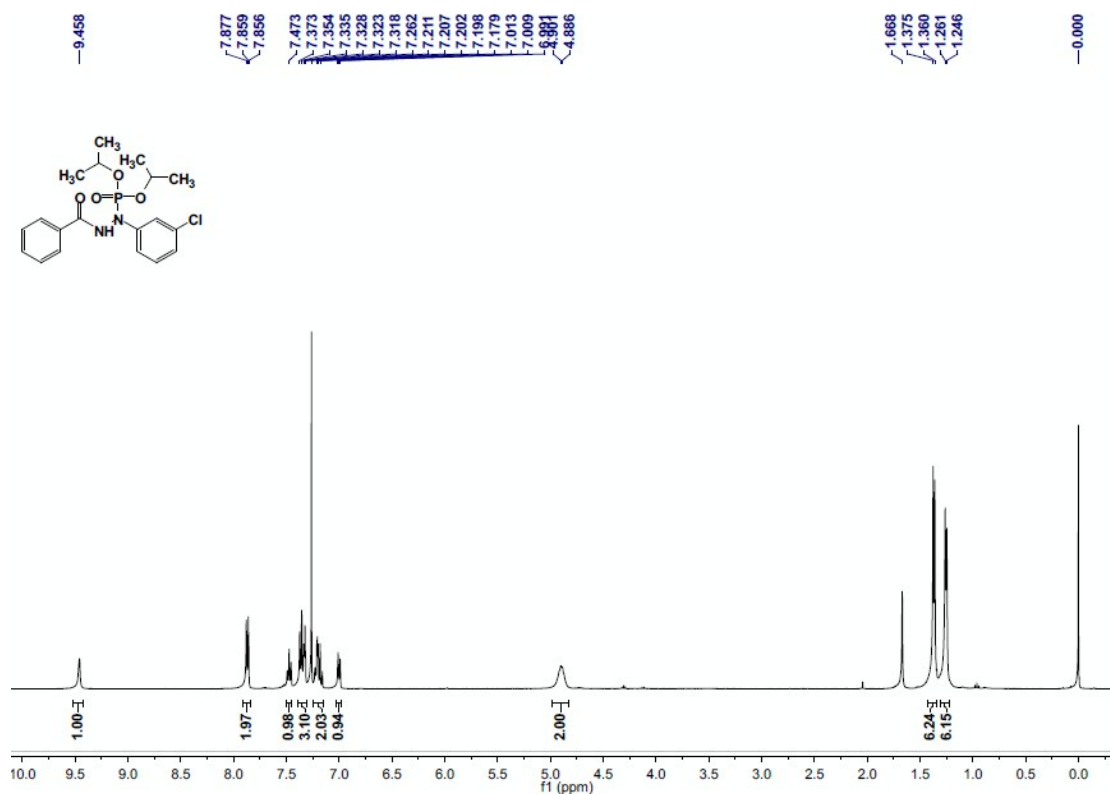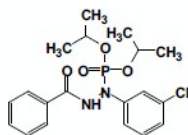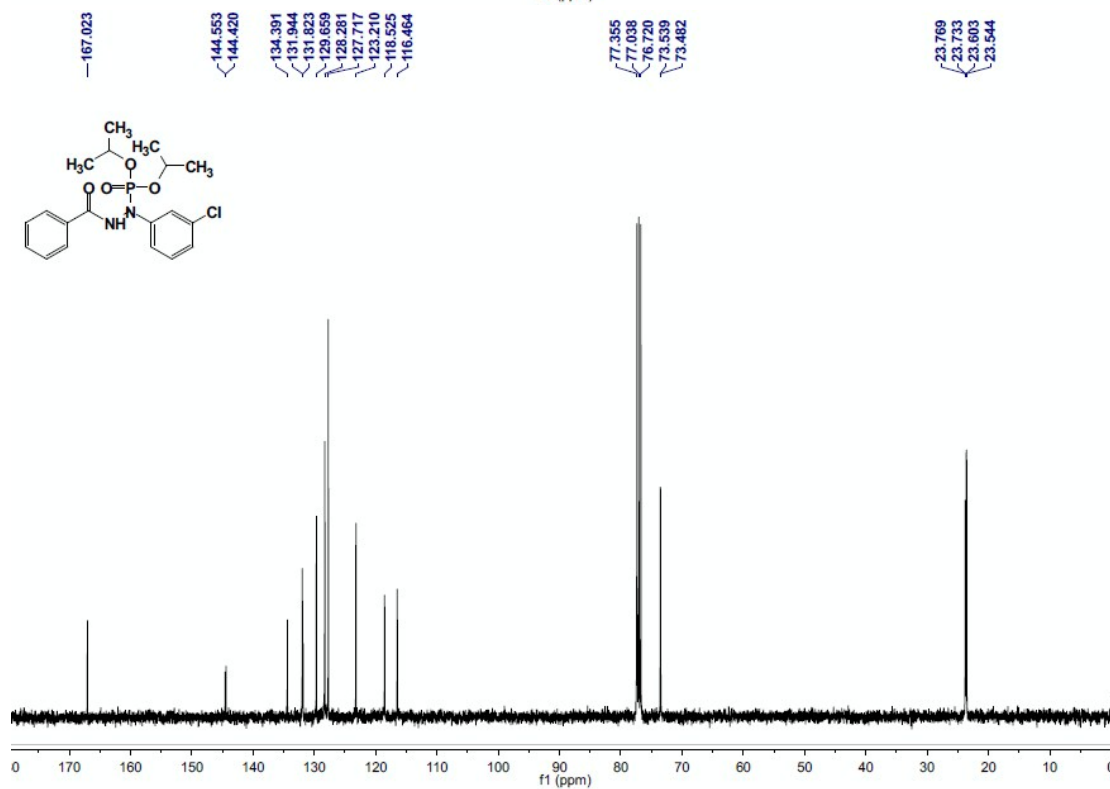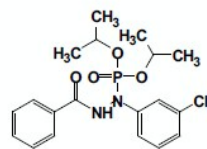

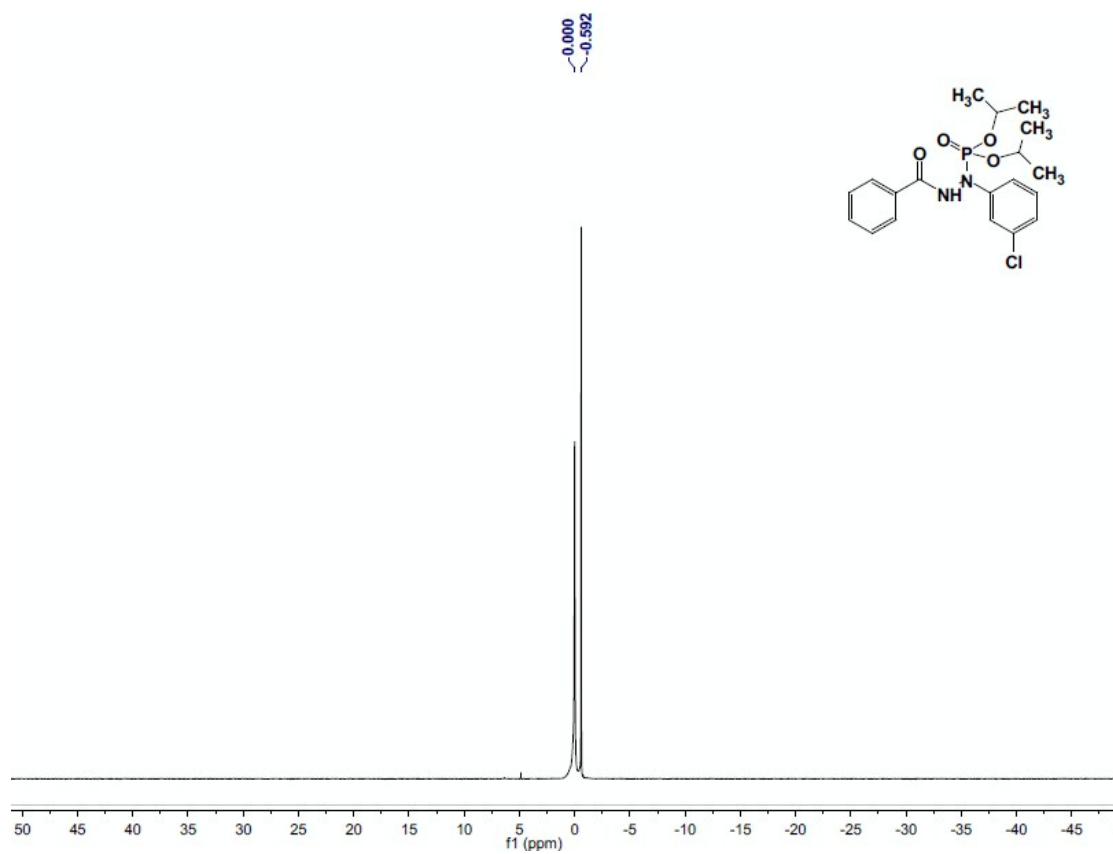

**Diisopropyl (2-benzoyl-1-(2-chlorophenyl)hydrazinyl)phosphonate (3f)**

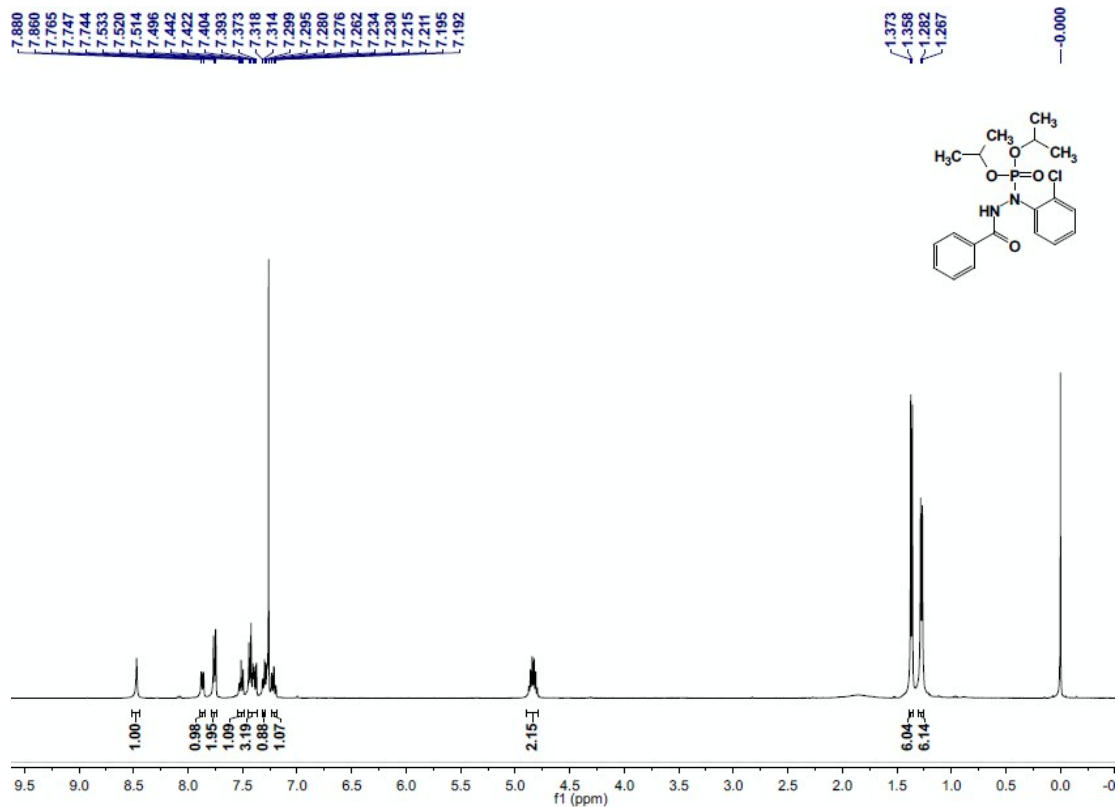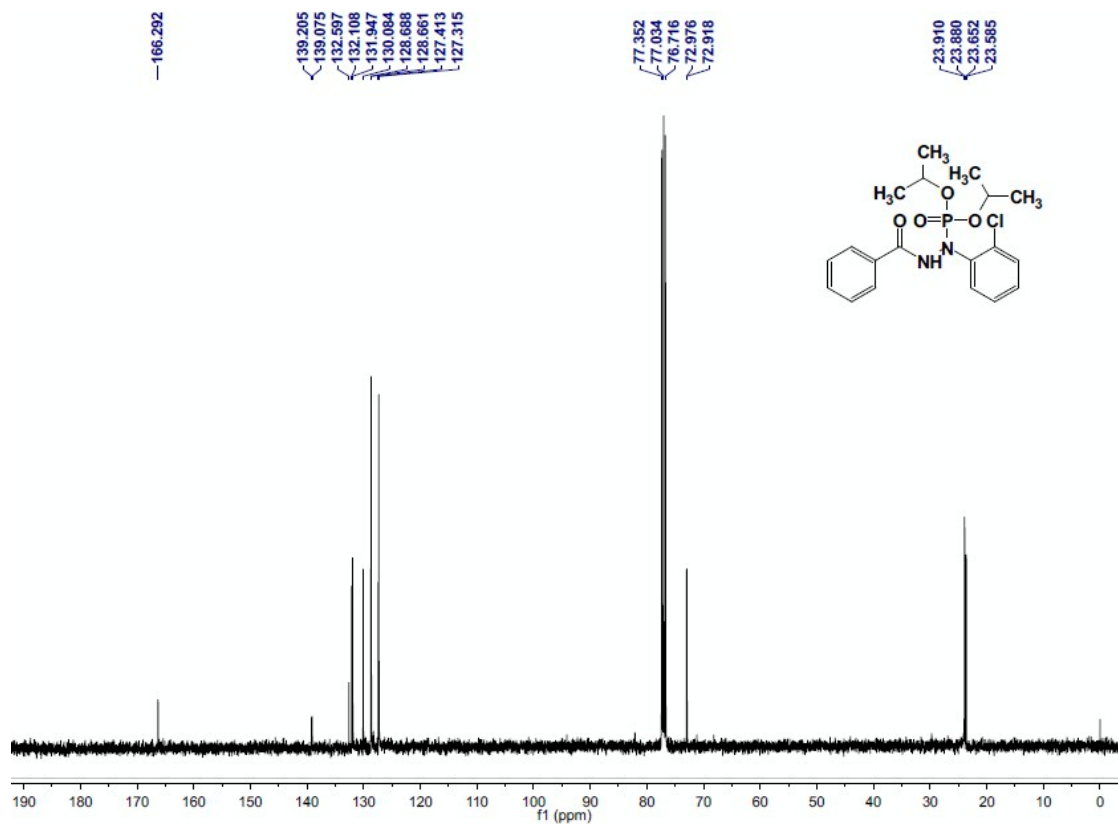

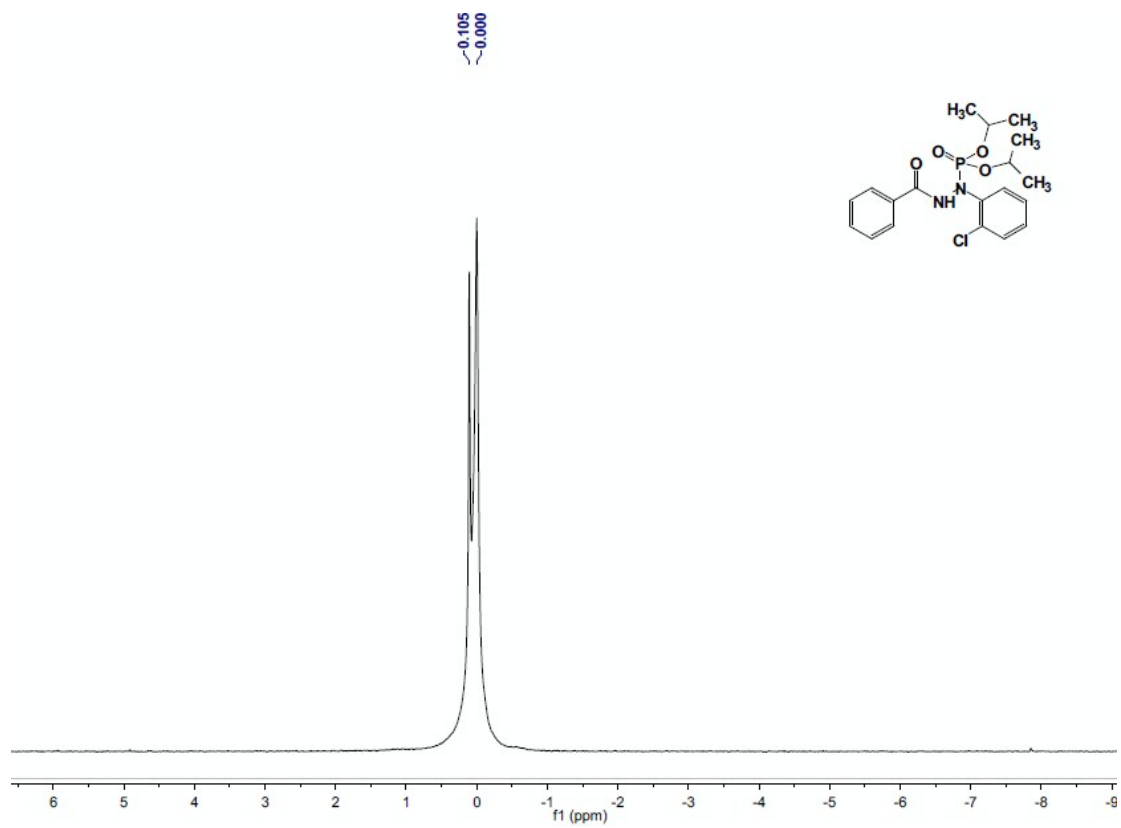



**Diisopropyl (2-benzoyl-1-(4-methoxyphenyl)hydrazinyl)phosphonate (3g)**

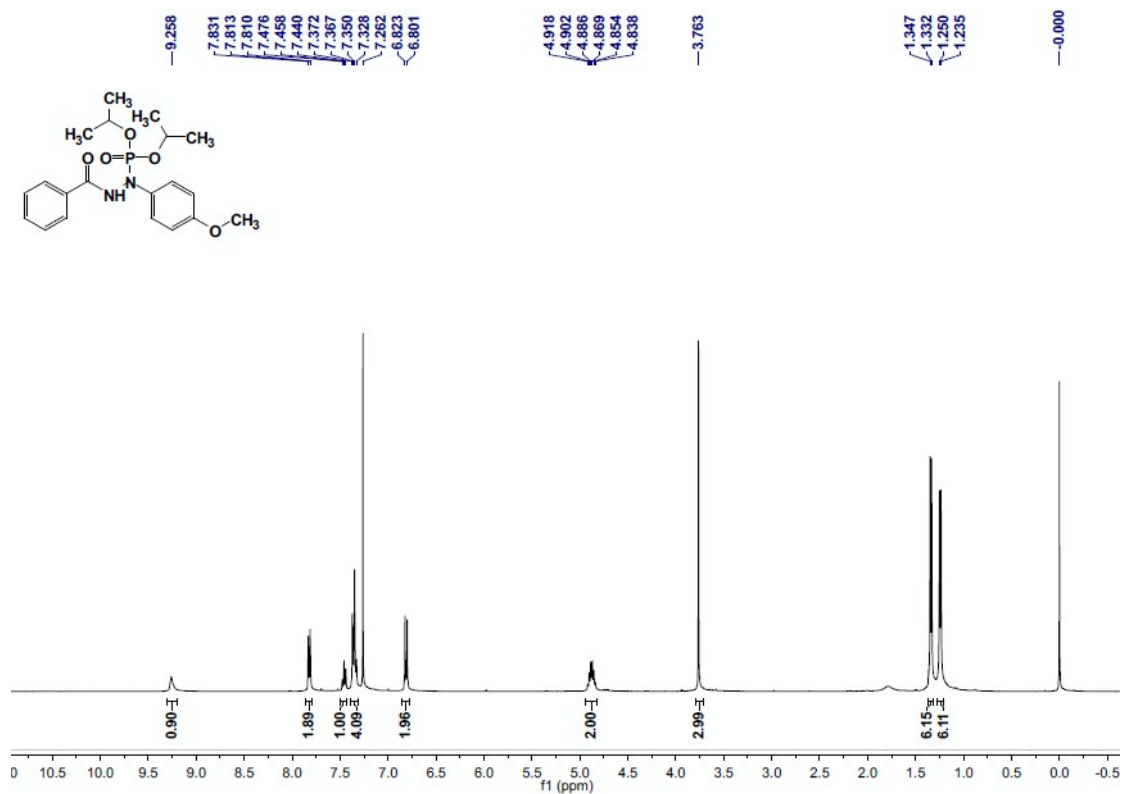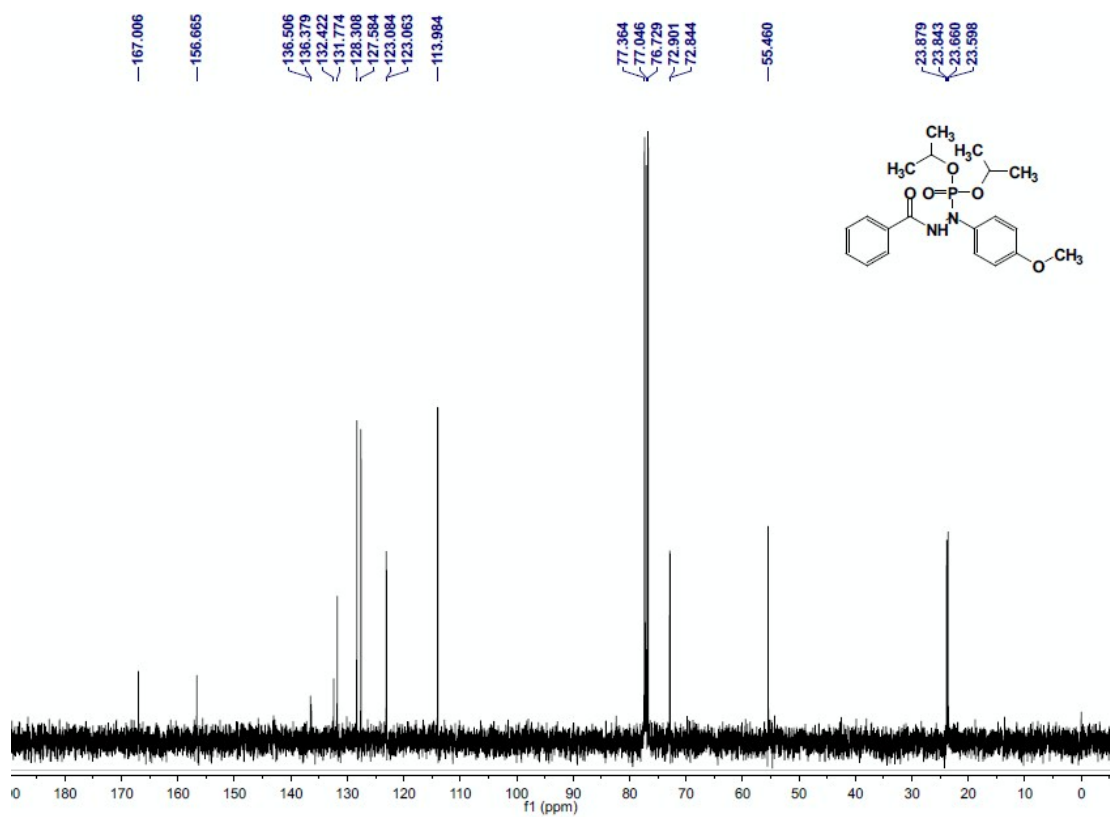

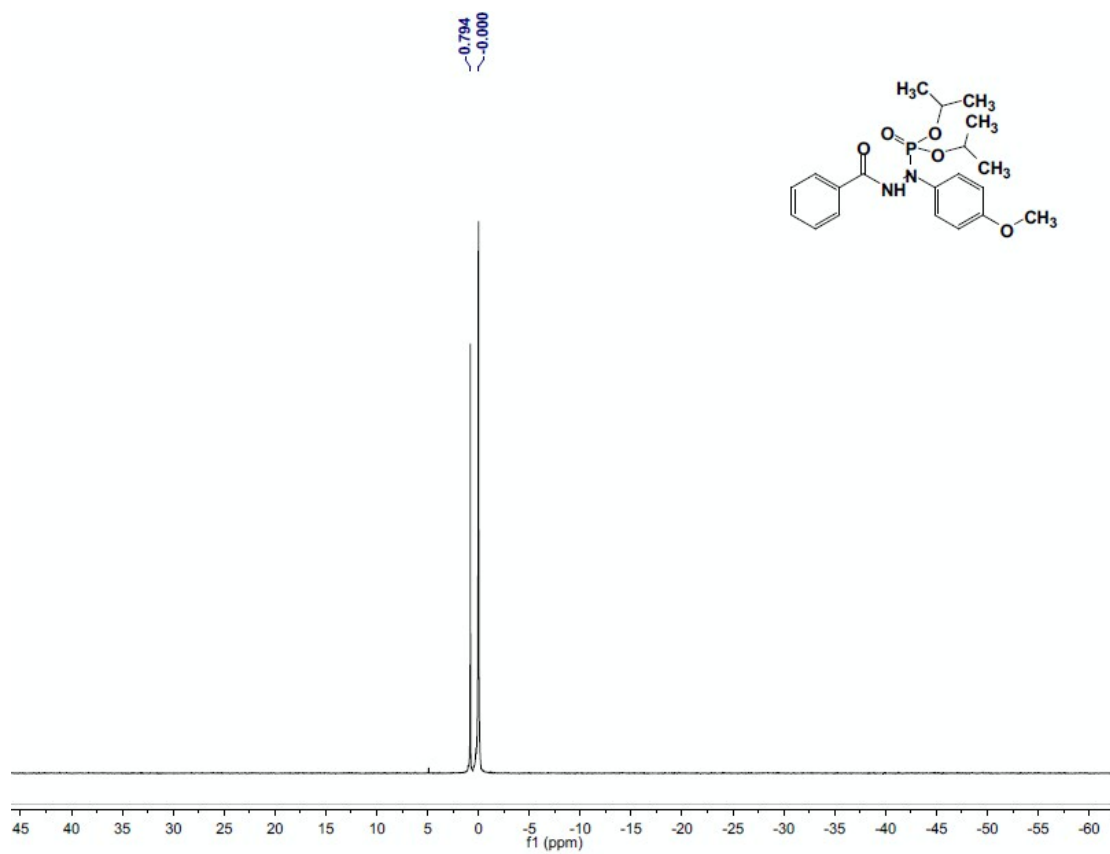

*Diisopropyl (2-benzoyl-1-(4-nitrophenyl)hydrazinyl)phosphonate (3h)*

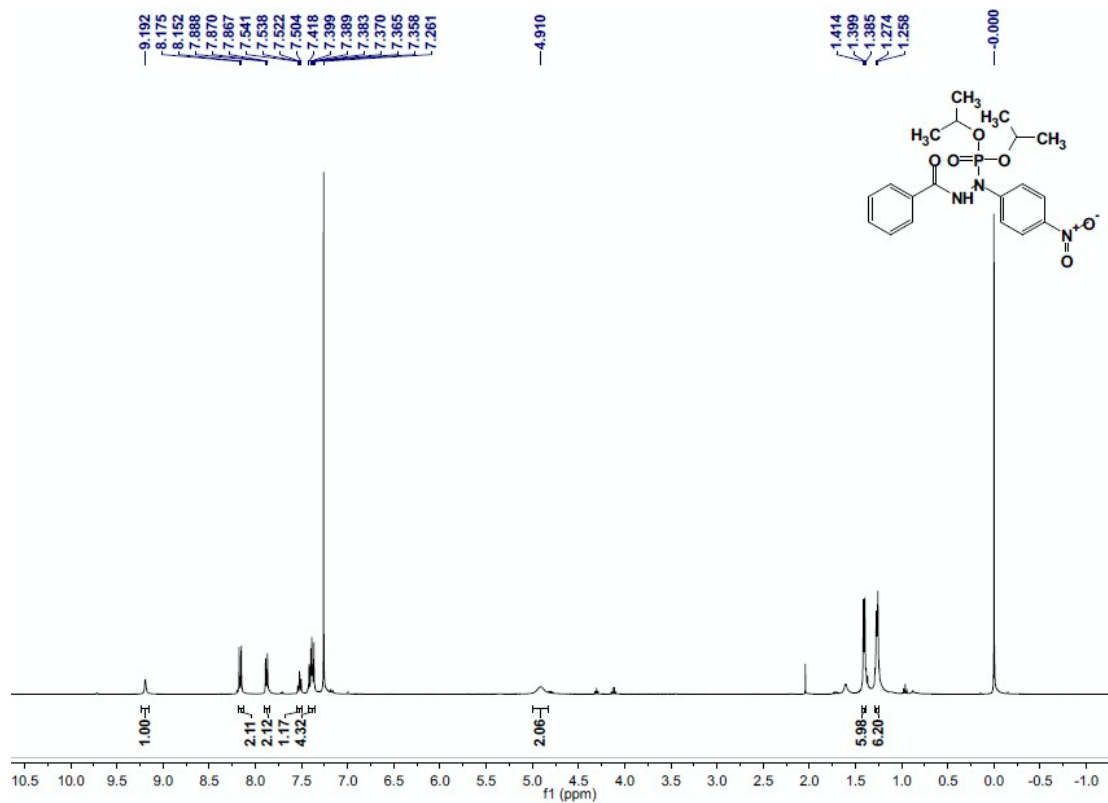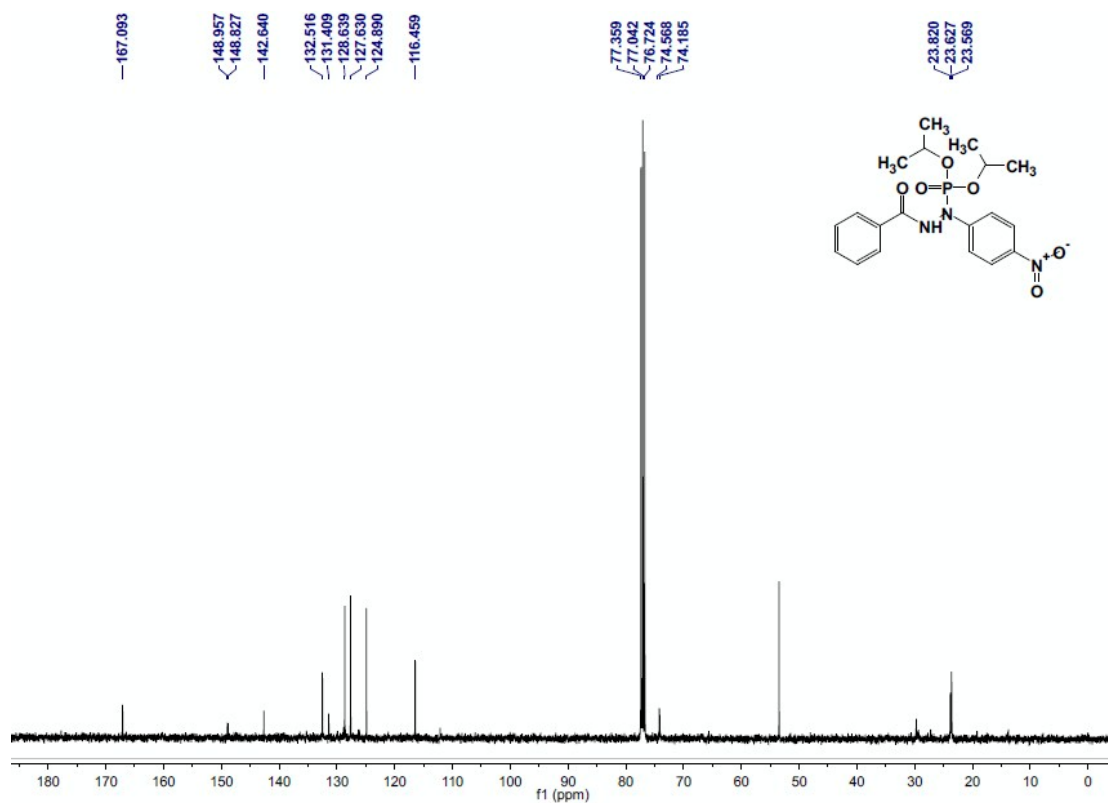

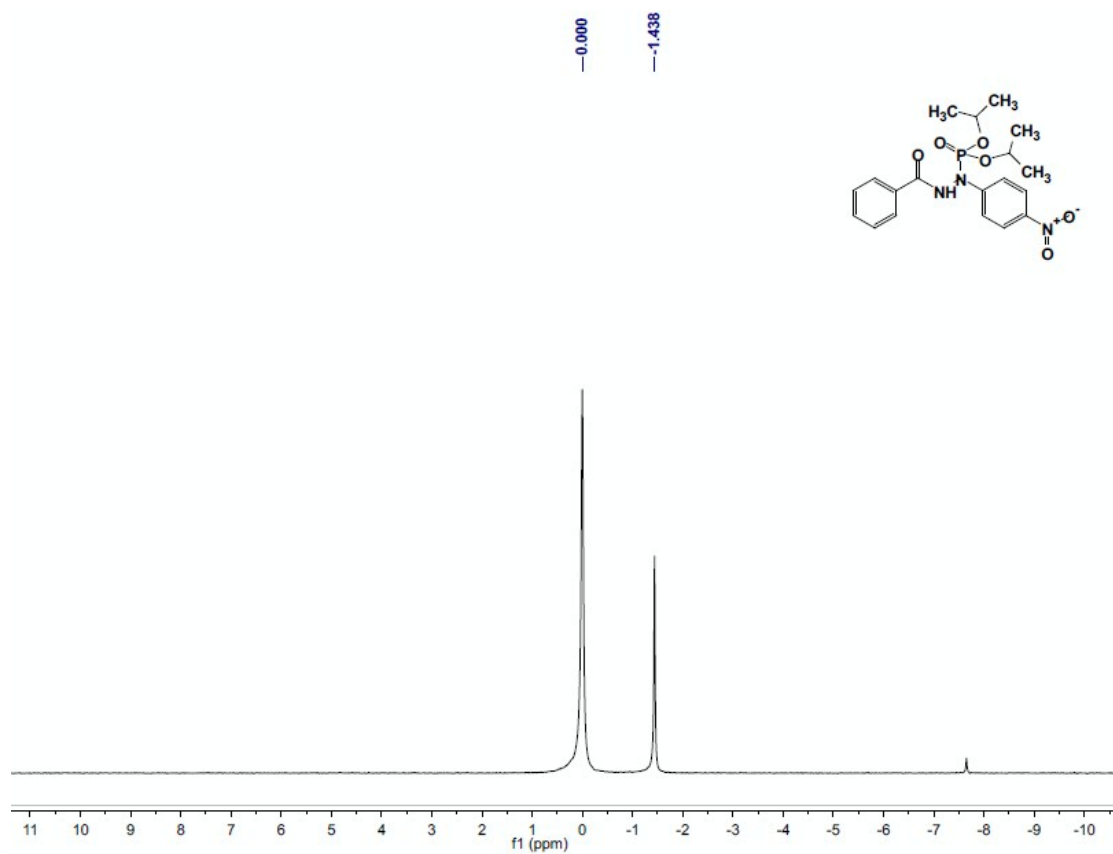

**Diisopropyl (1-benzoyl-2-(4-nitrophenyl)hydrazinyl)phosphonate (3h')**

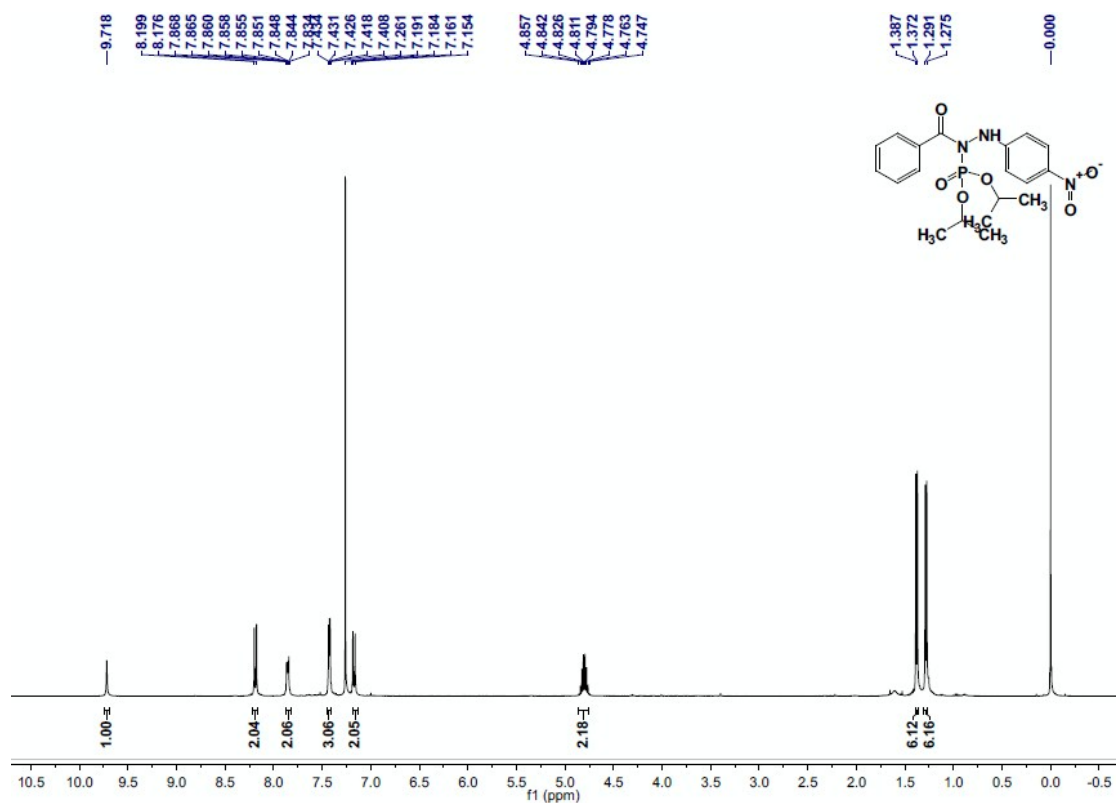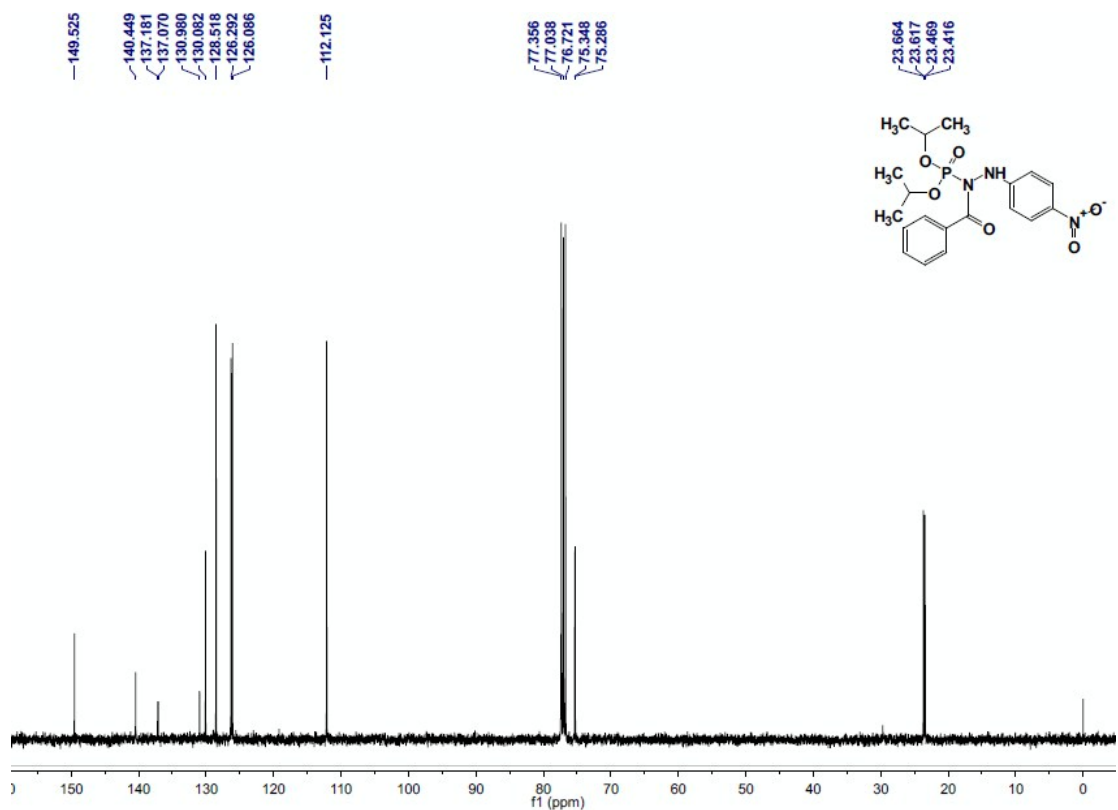

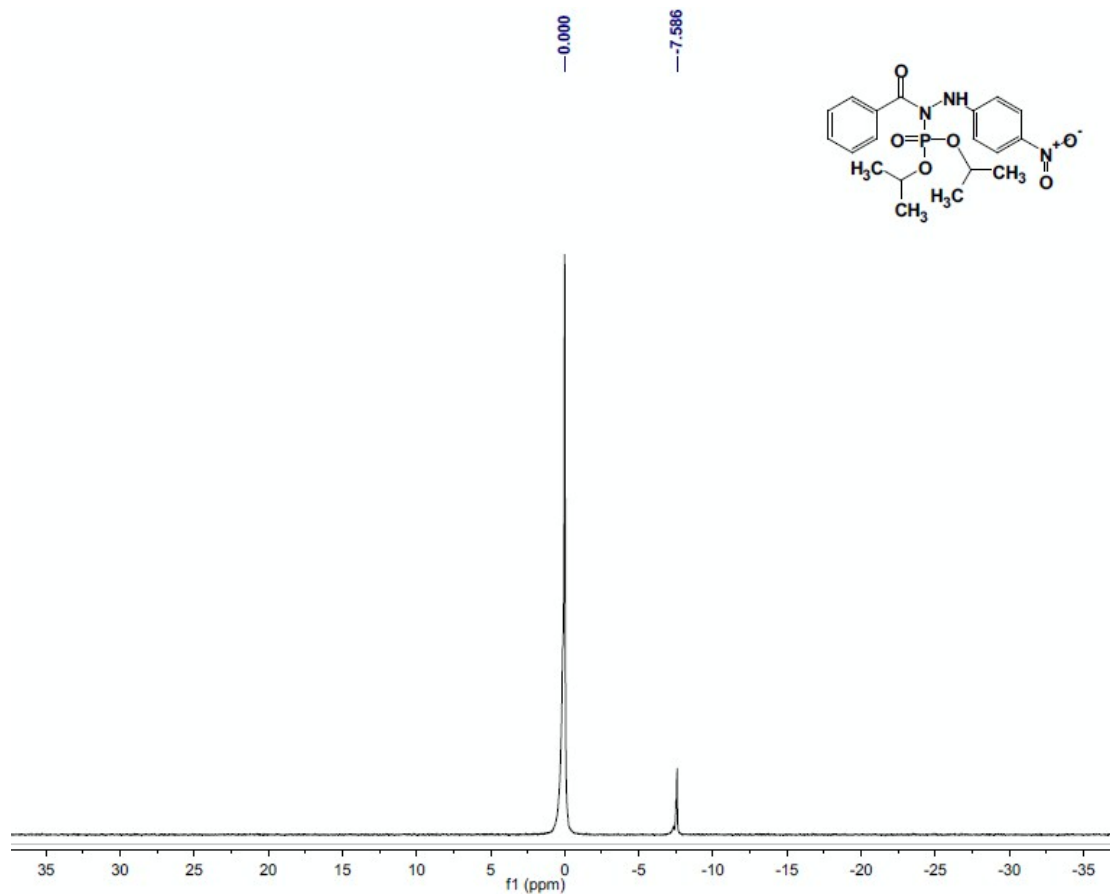

**Diisopropyl (2-benzoyl-1-(3,5-dimethylphenyl)hydrazinyl)phosphonate (3i)**

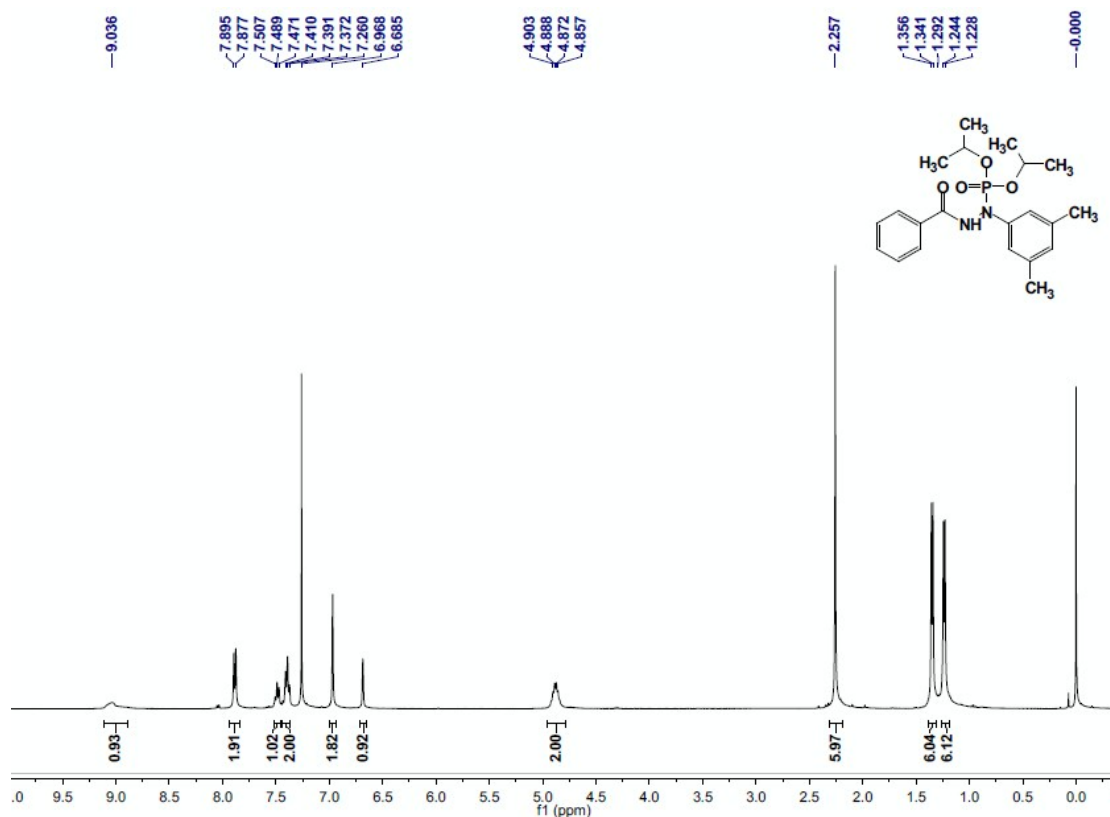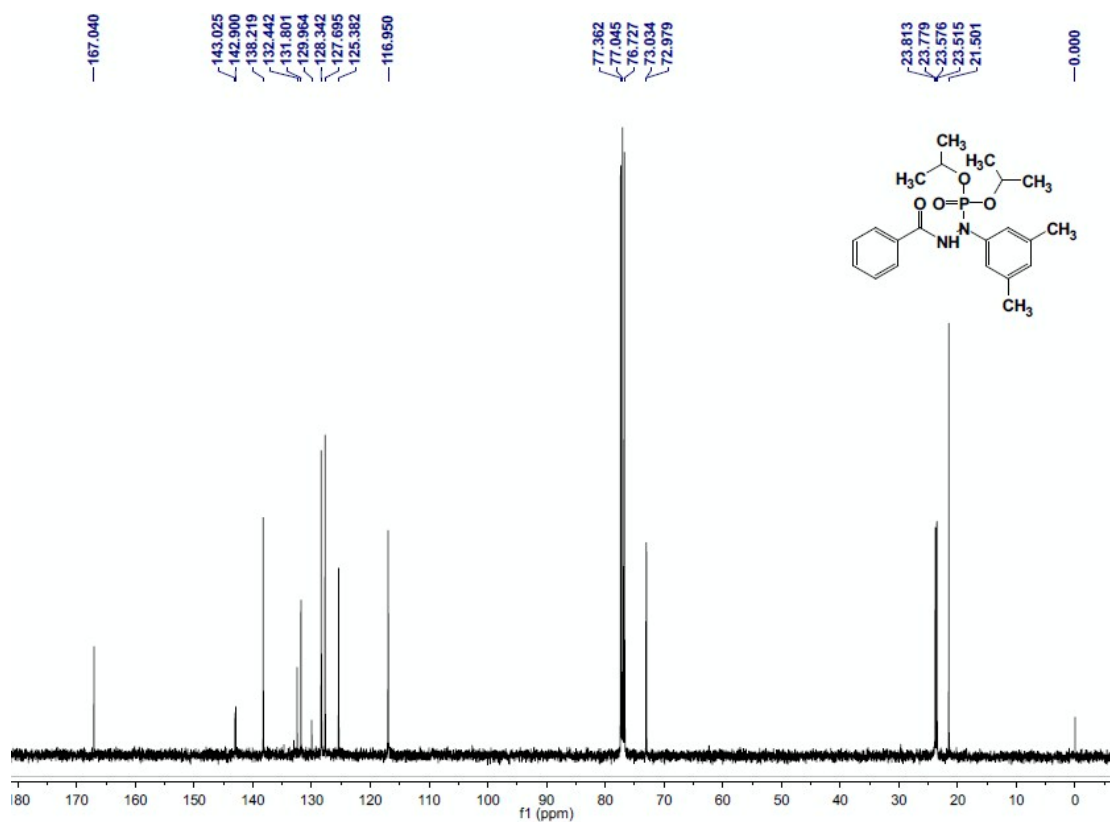

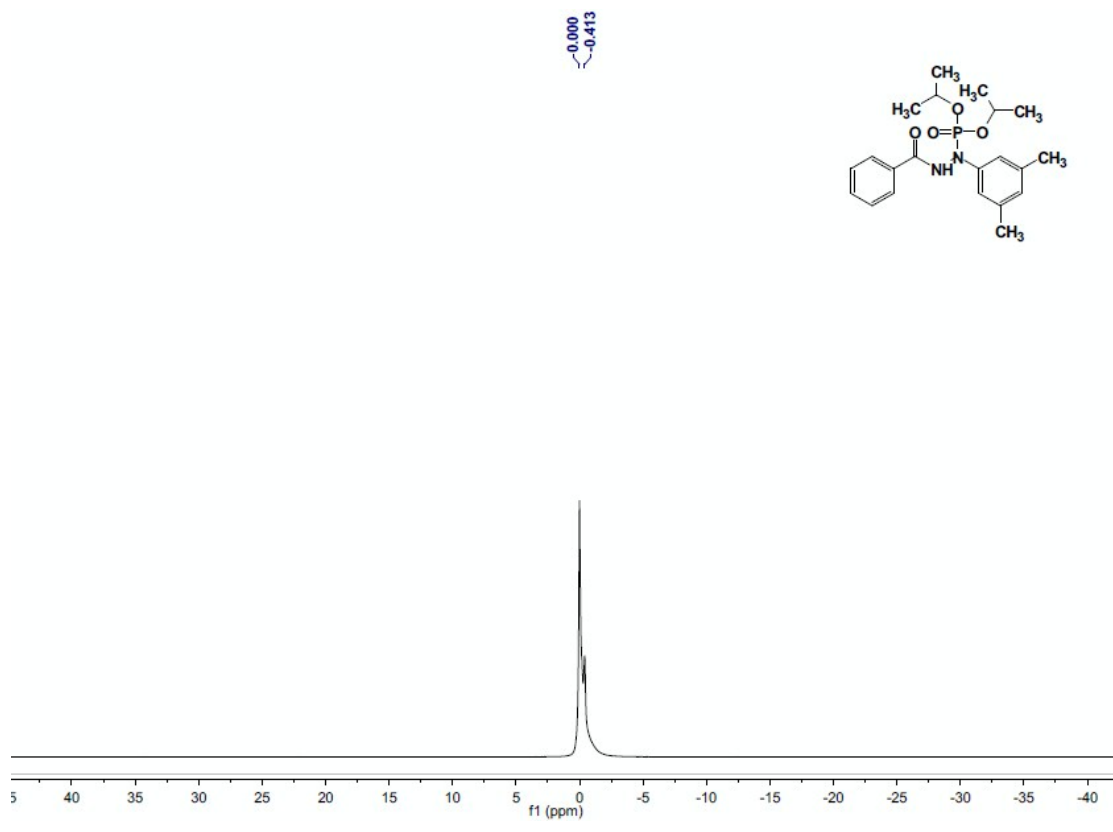



**Diisopropyl (2-benzoyl-1-(6-chloropyridin-2-yl)hydrazinyl)phosphonate (3j)**

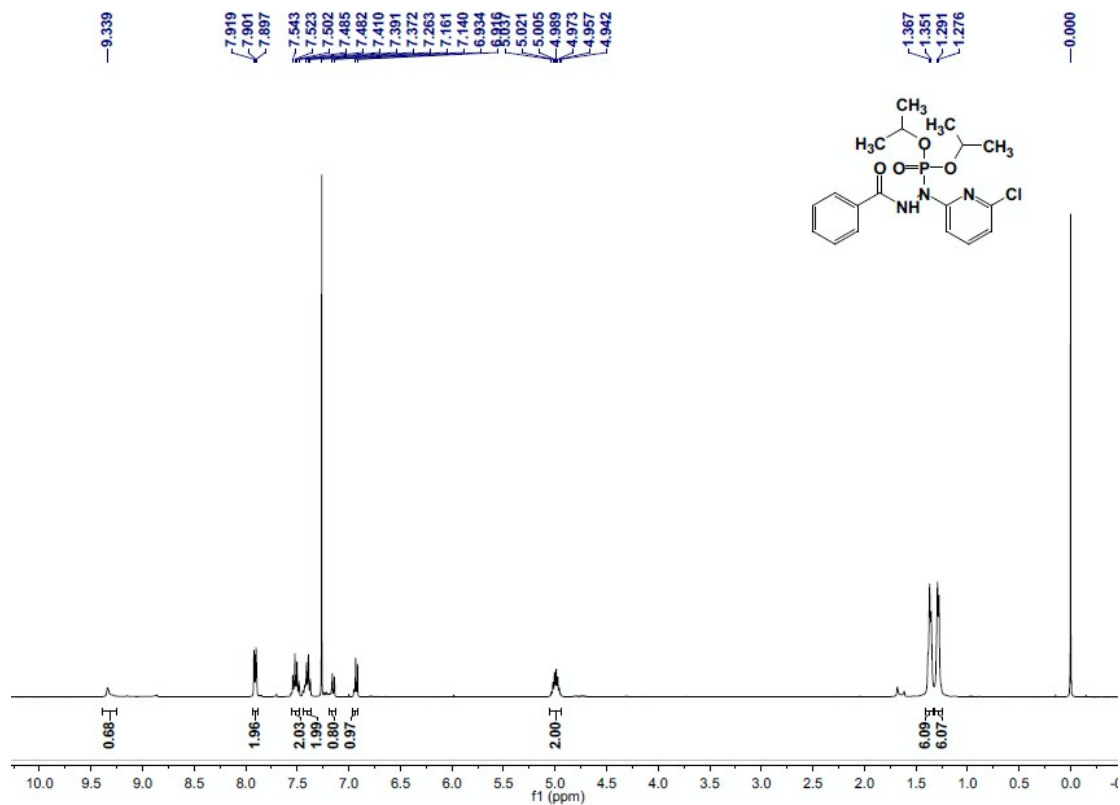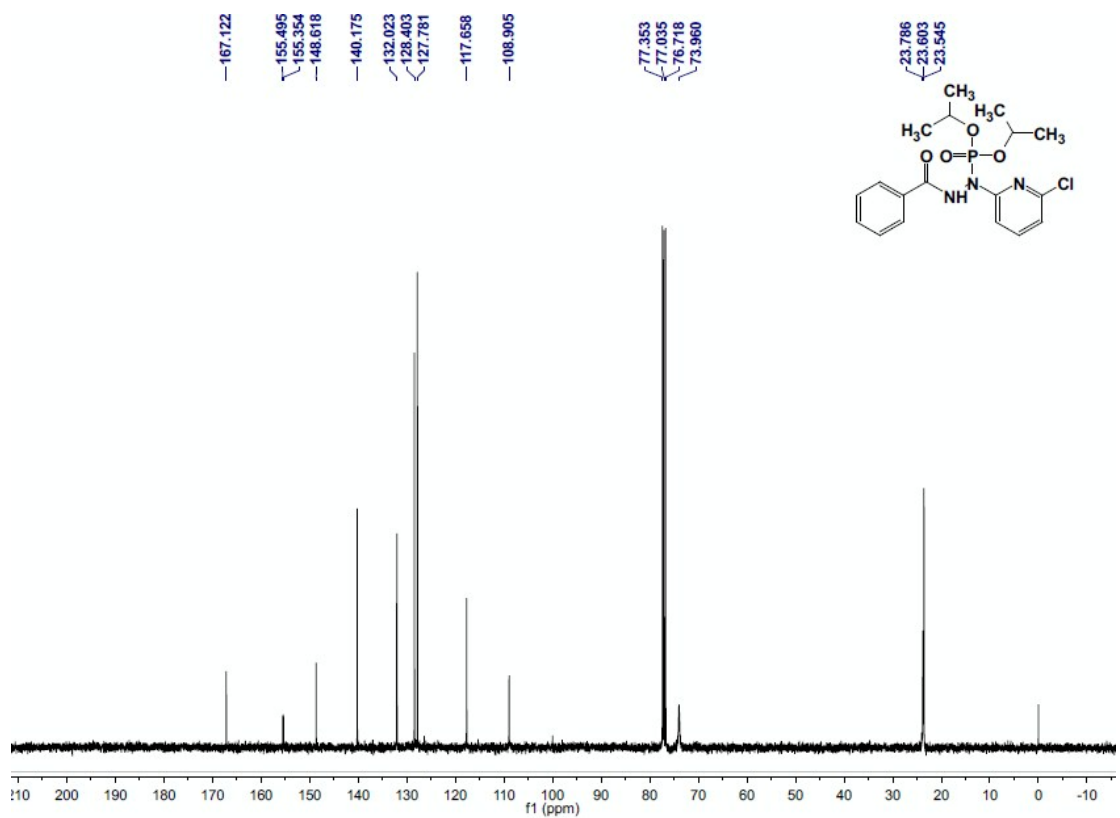

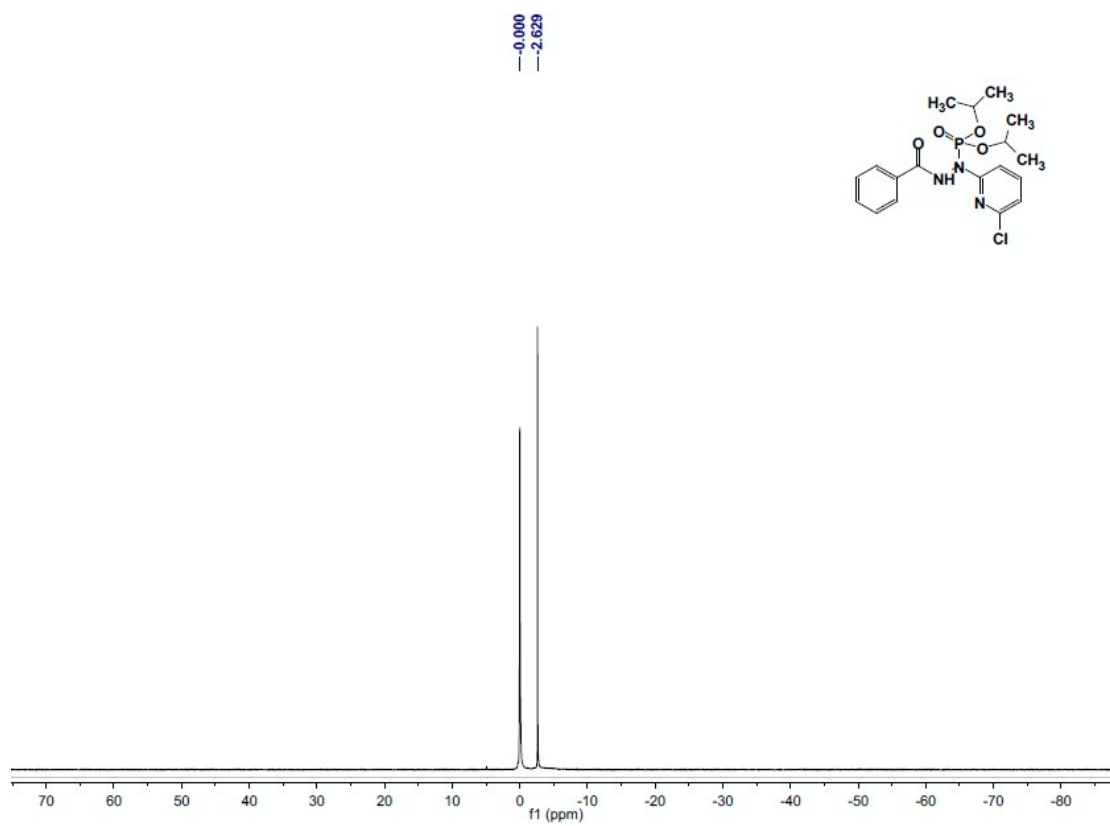

**Diisopropyl (2-(4-methoxybenzoyl)-1-phenylhydrazinyl)phosphonate (3l)**

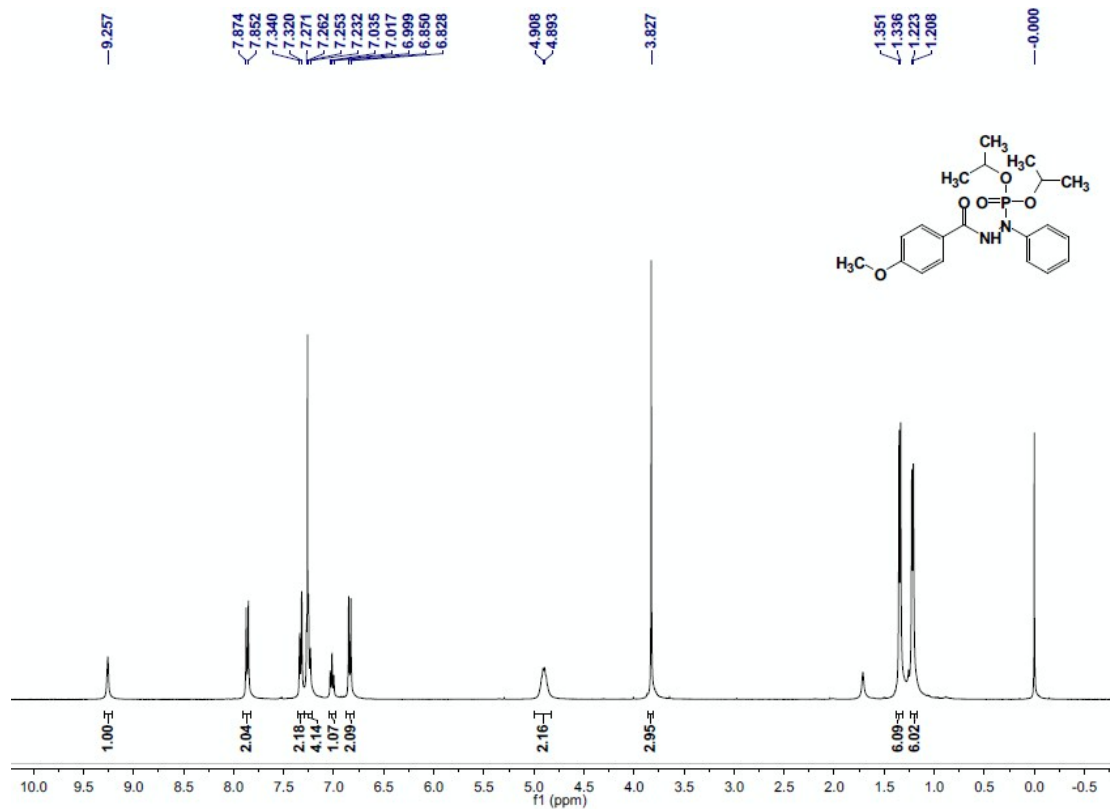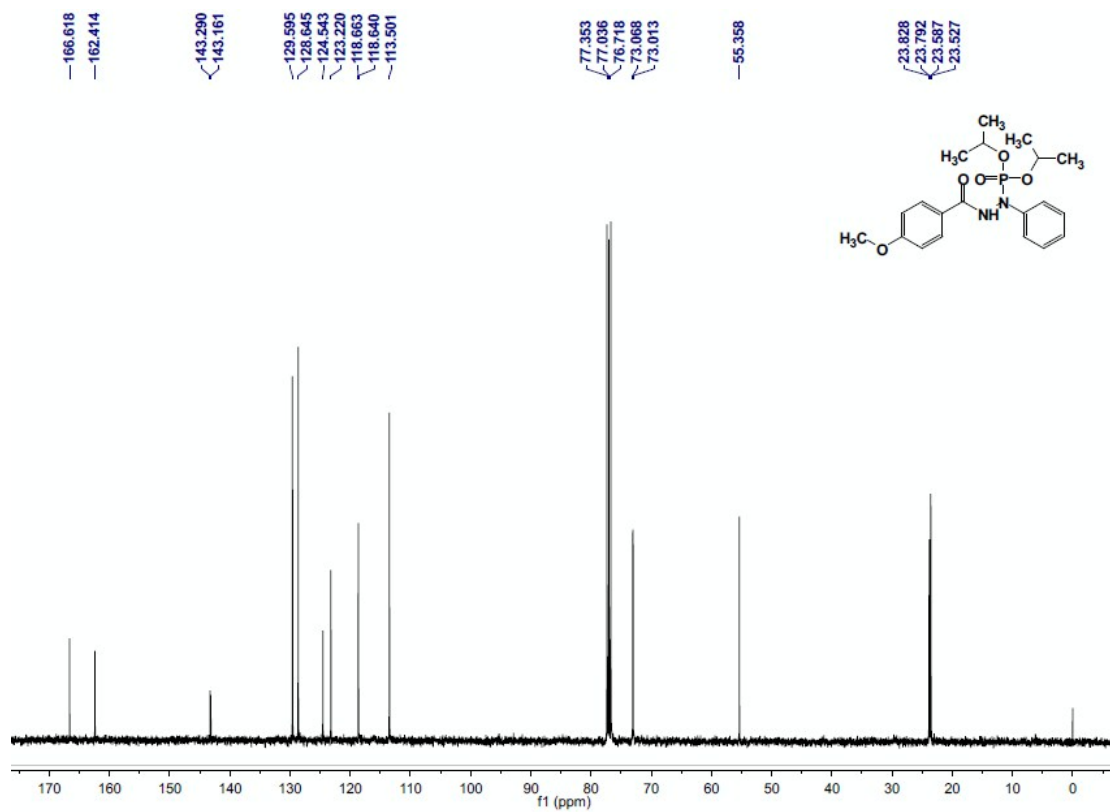

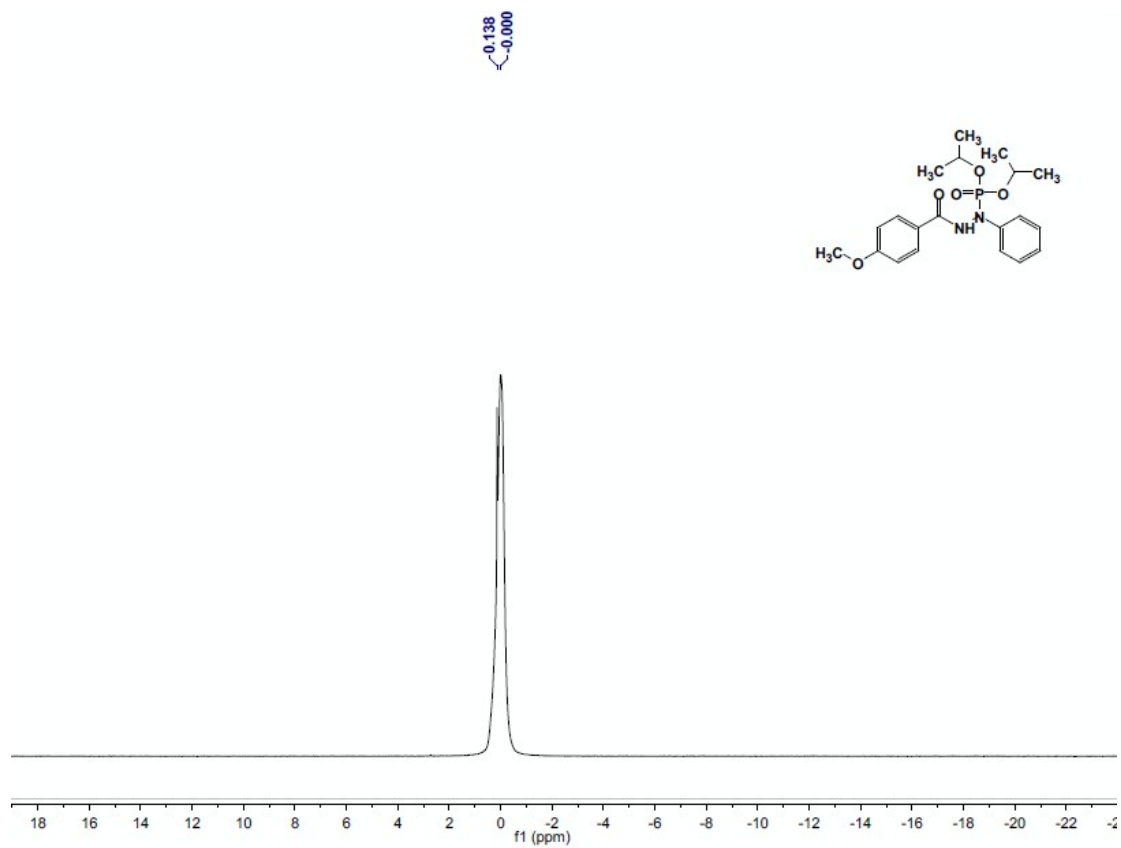

**Diisopropyl (2-(4-hydroxybenzoyl)-1-phenylhydrazinyl)phosphonate (3m)**

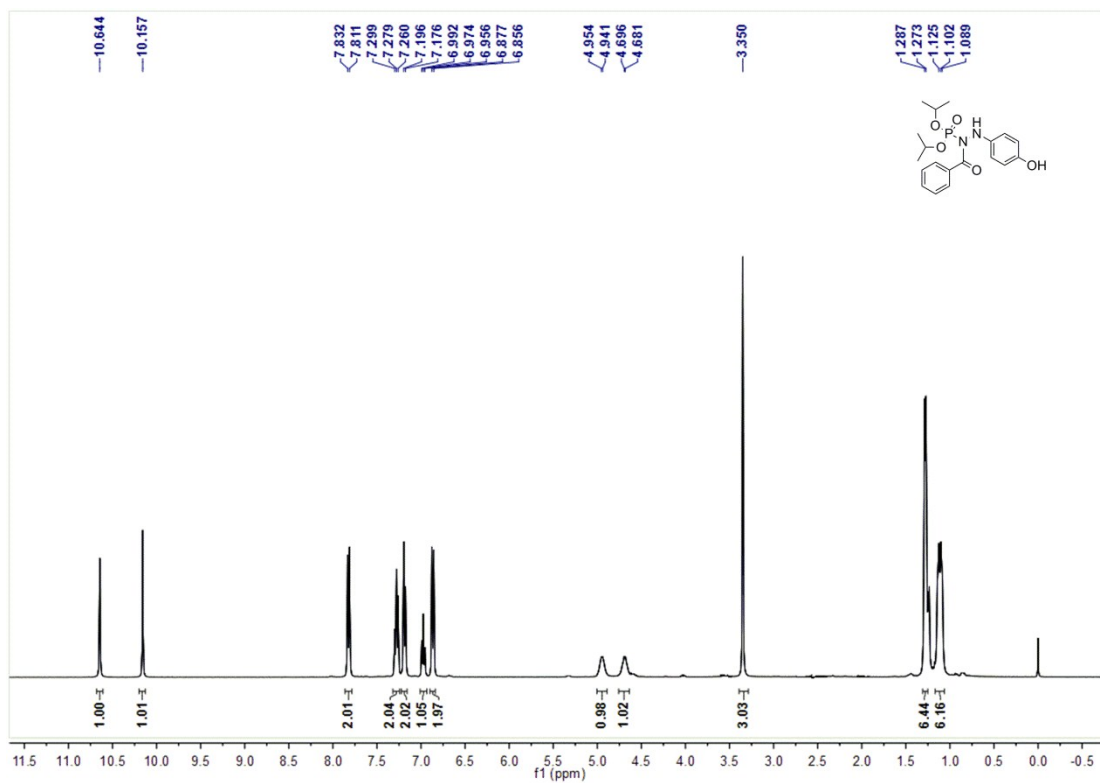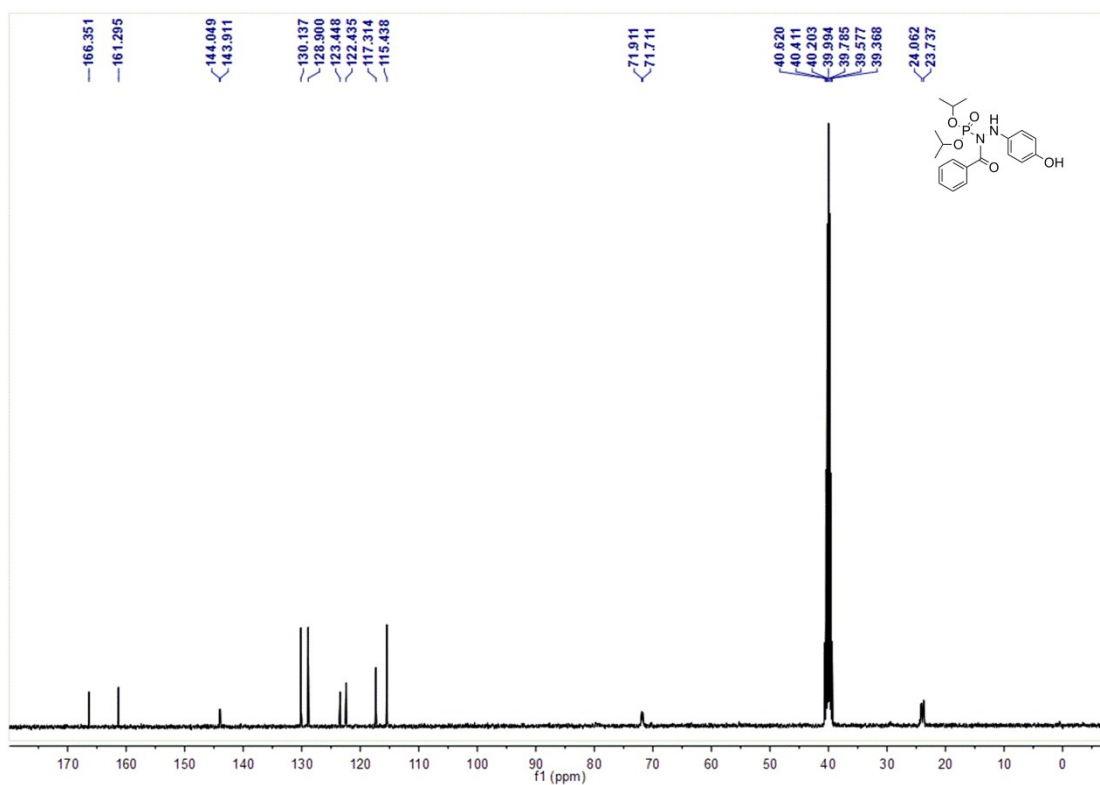

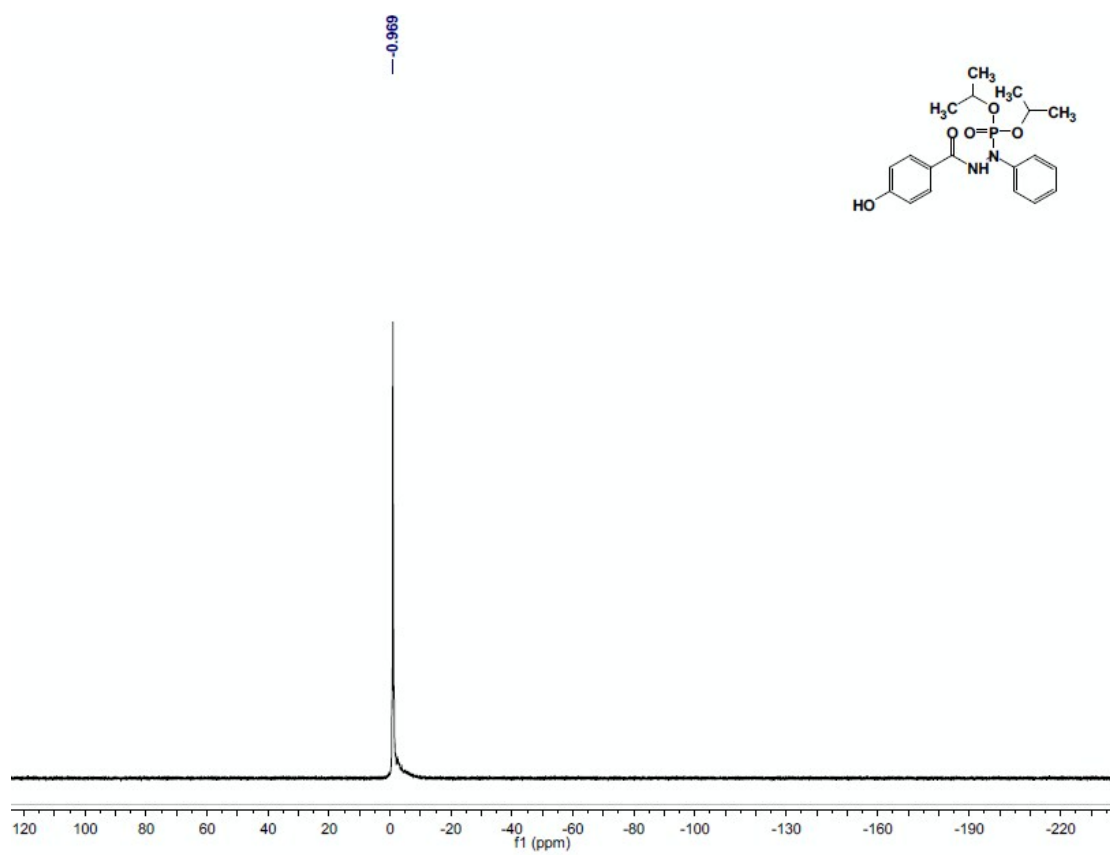

**Diisopropyl (2-(4-bromobenzoyl)-1-phenylhydrazinyl)phosphonate (3n)**

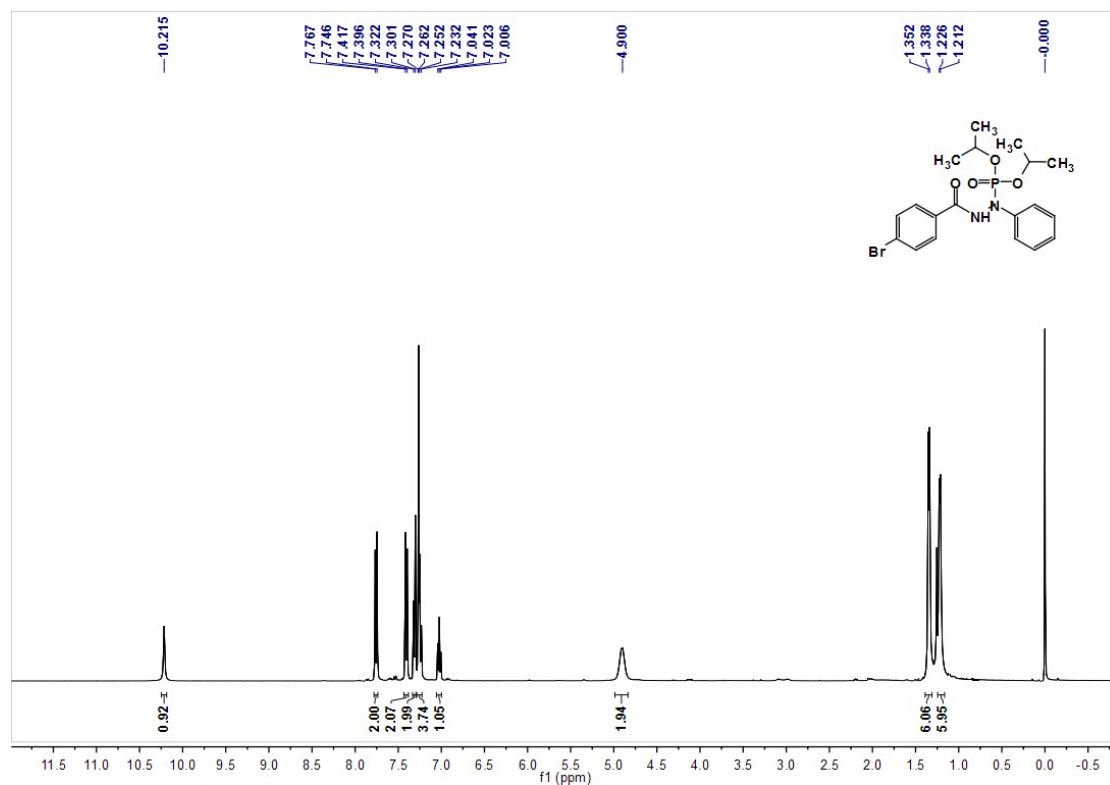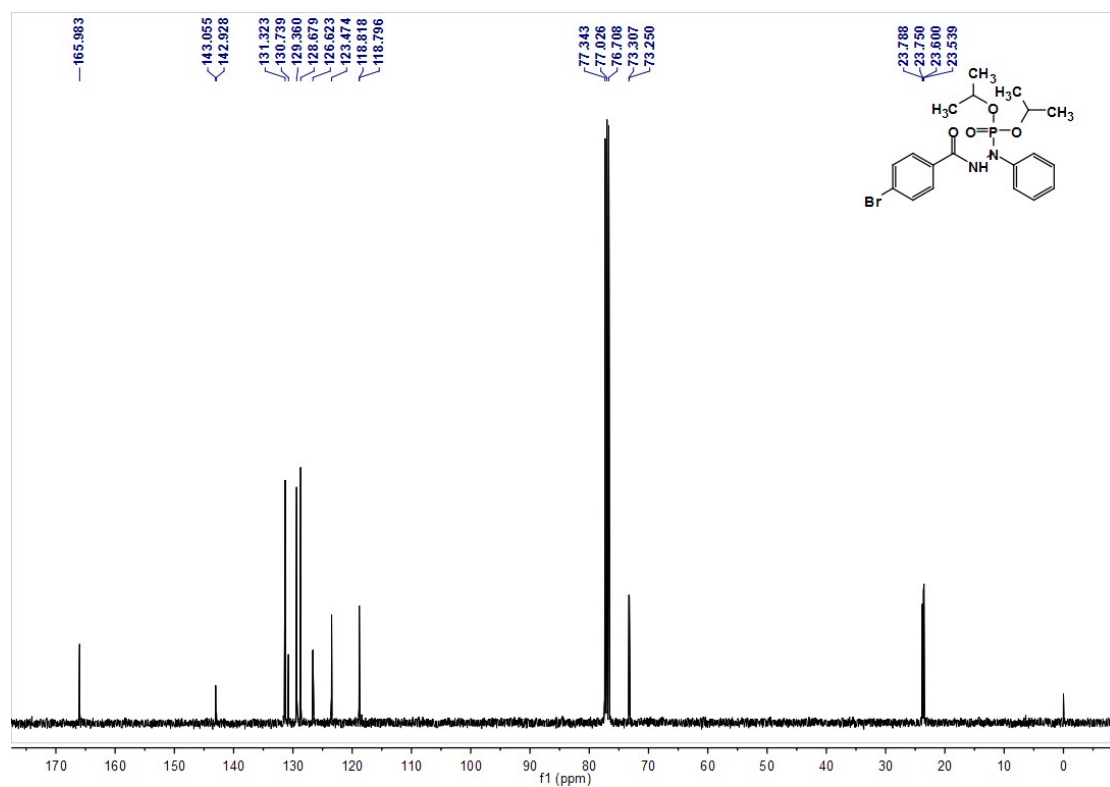

-0.290  
-0.000

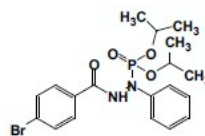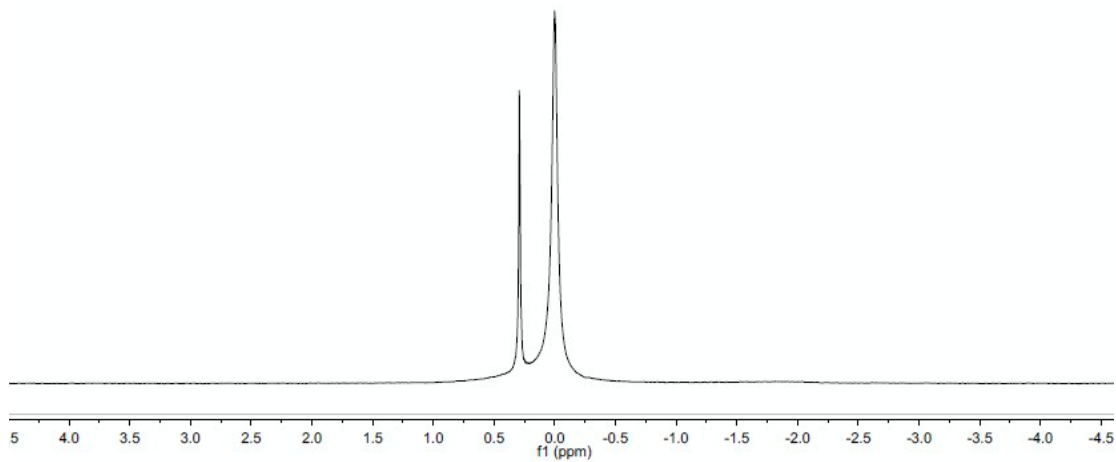



**Diisopropyl (2-(4-aminobenzoyl)-1-phenylhydrazinyl)phosphonate (3o)**

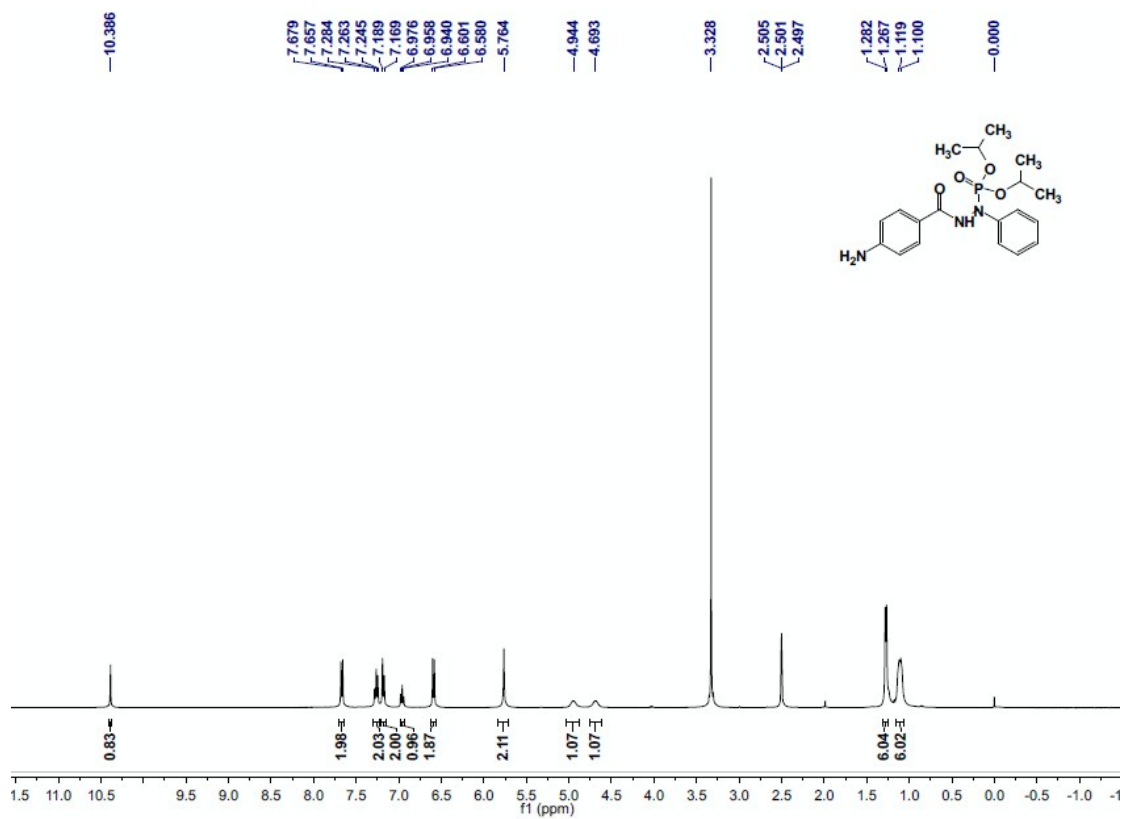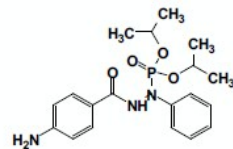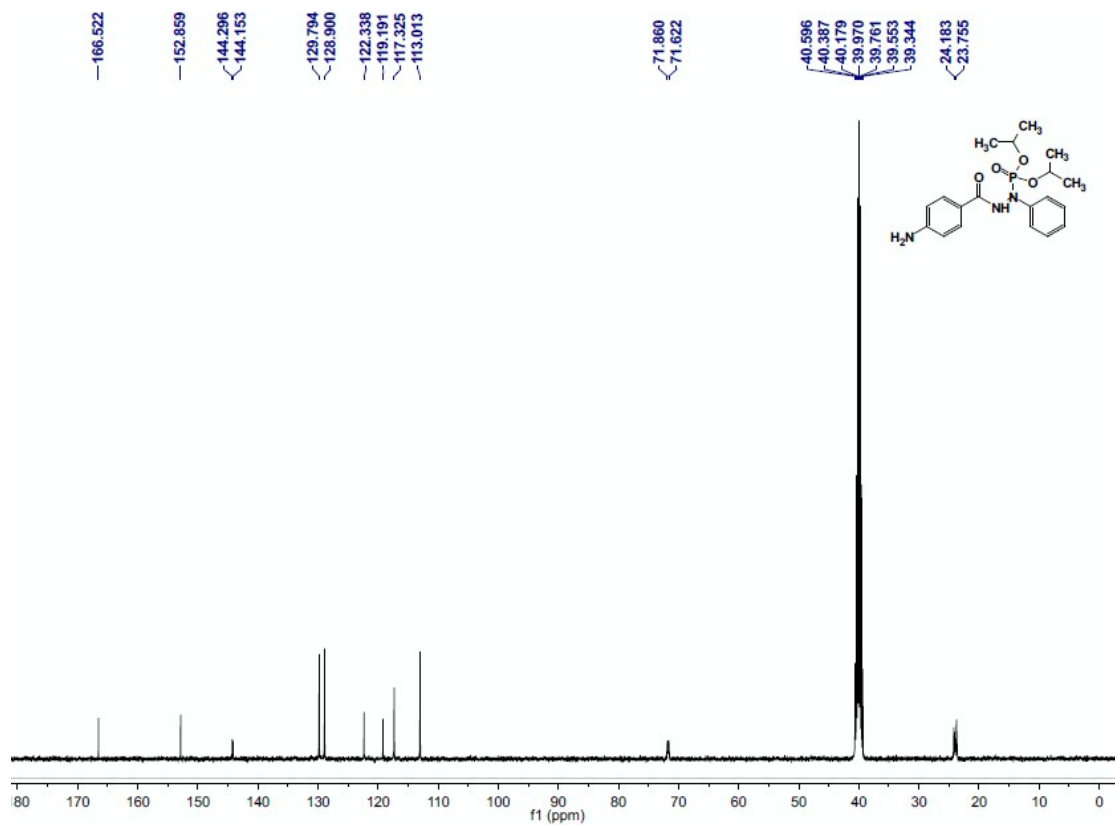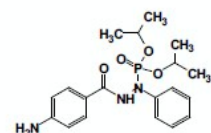

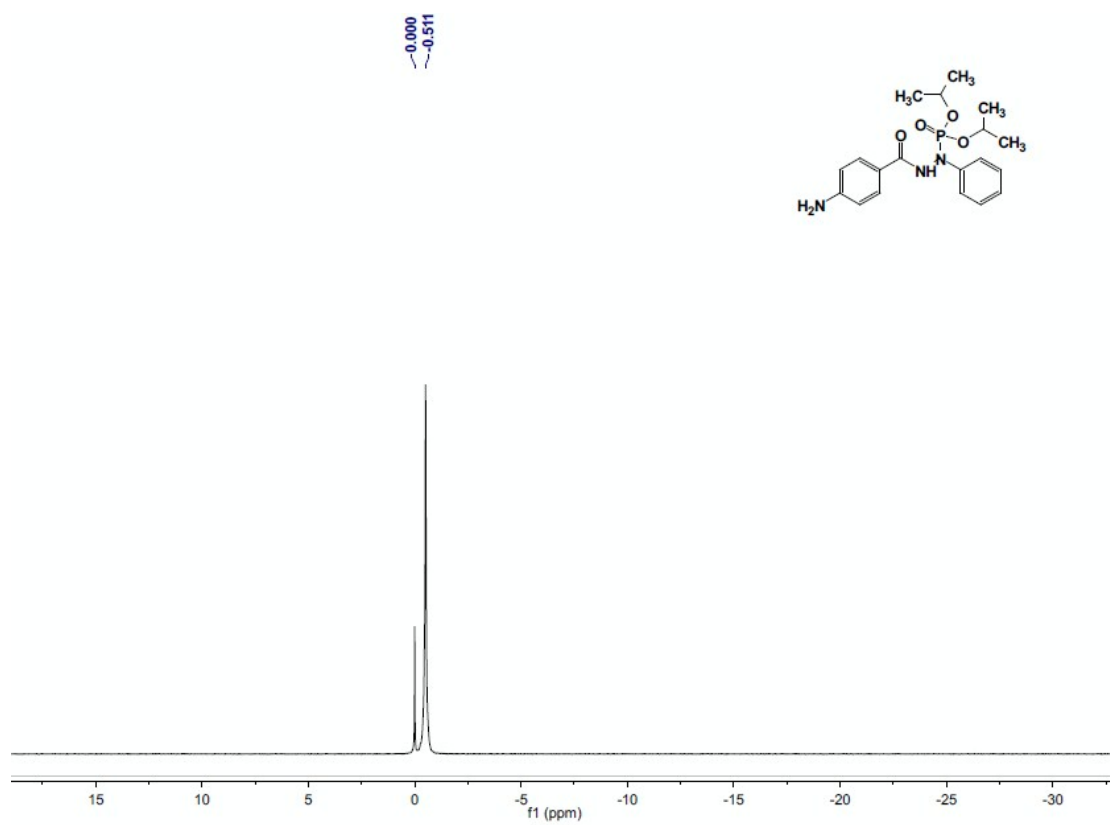

**Diisopropyl (2-(4-nitrobenzoyl)-1-phenylhydrazinyl)phosphonate (3p)**

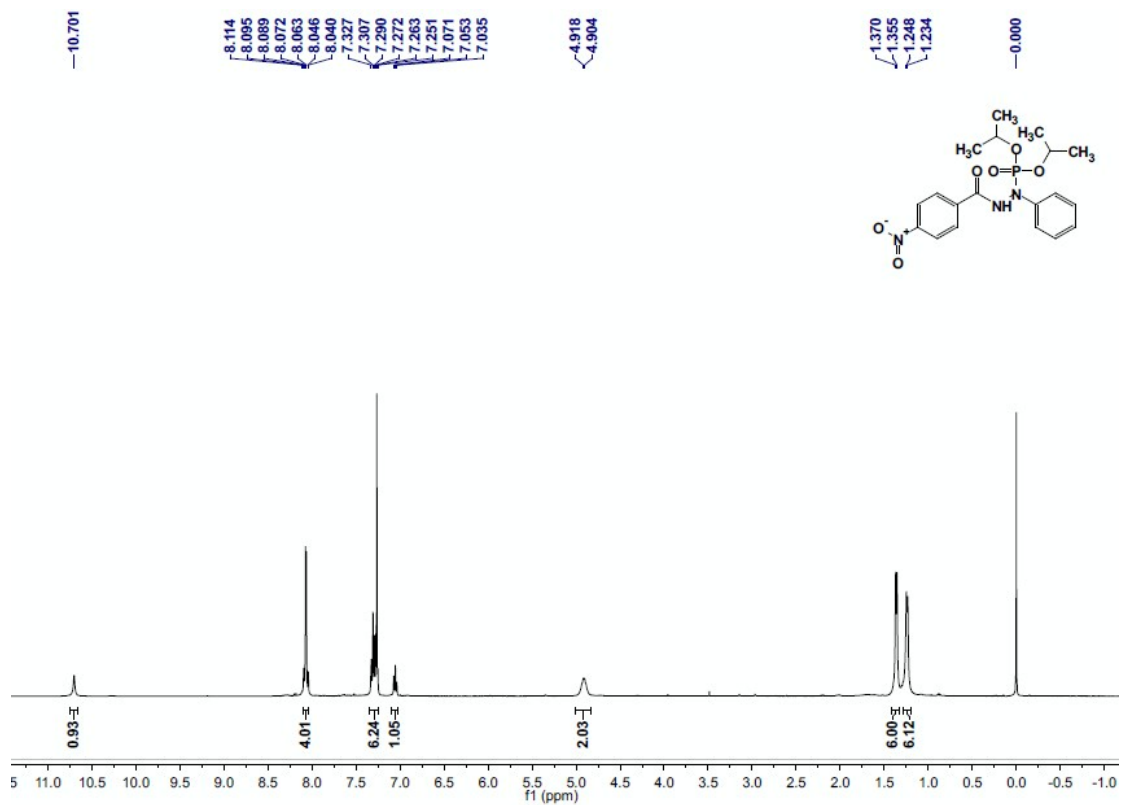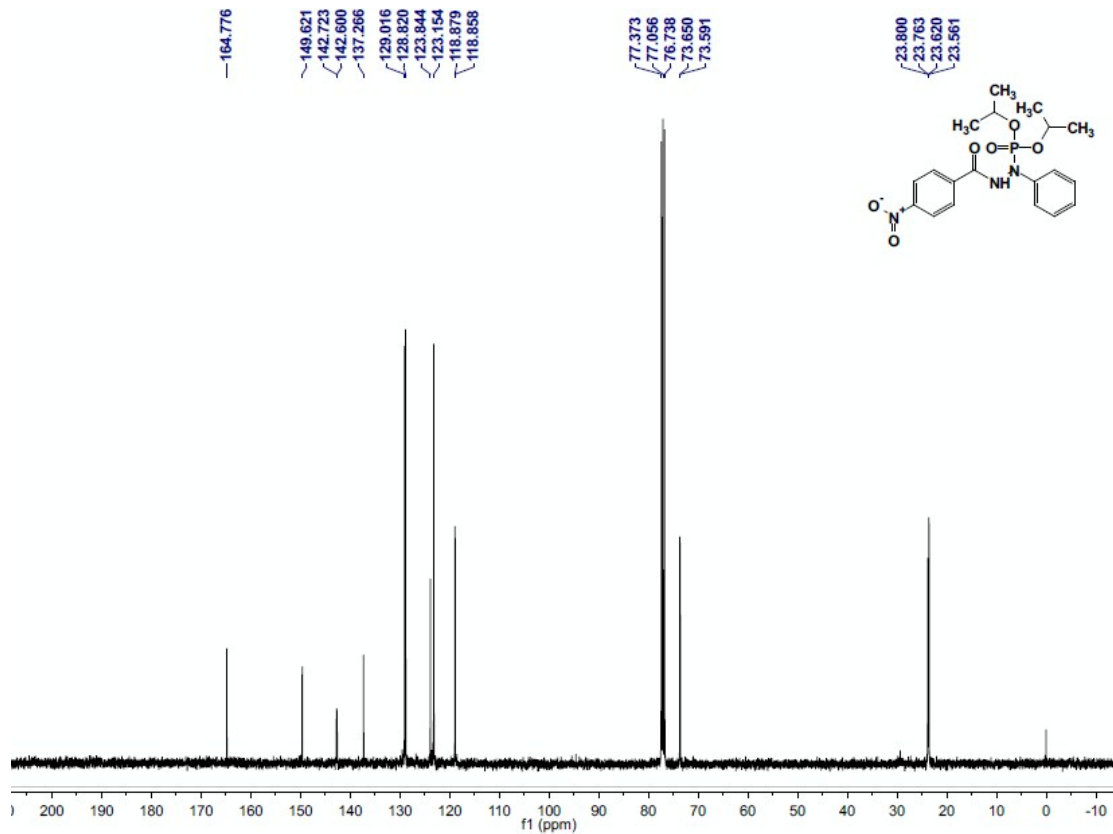

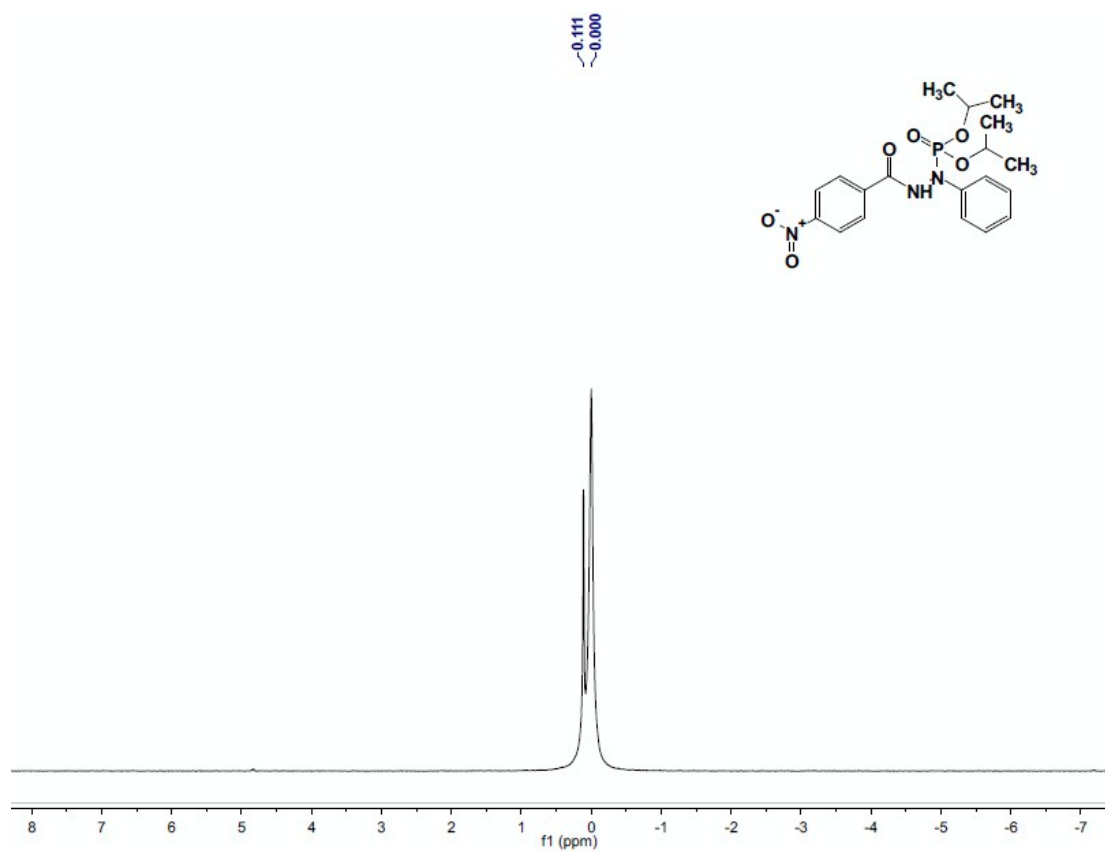

**Diisopropyl (2-(3-nitrobenzoyl)-1-phenylhydrazinyl)phosphonate (3q)**

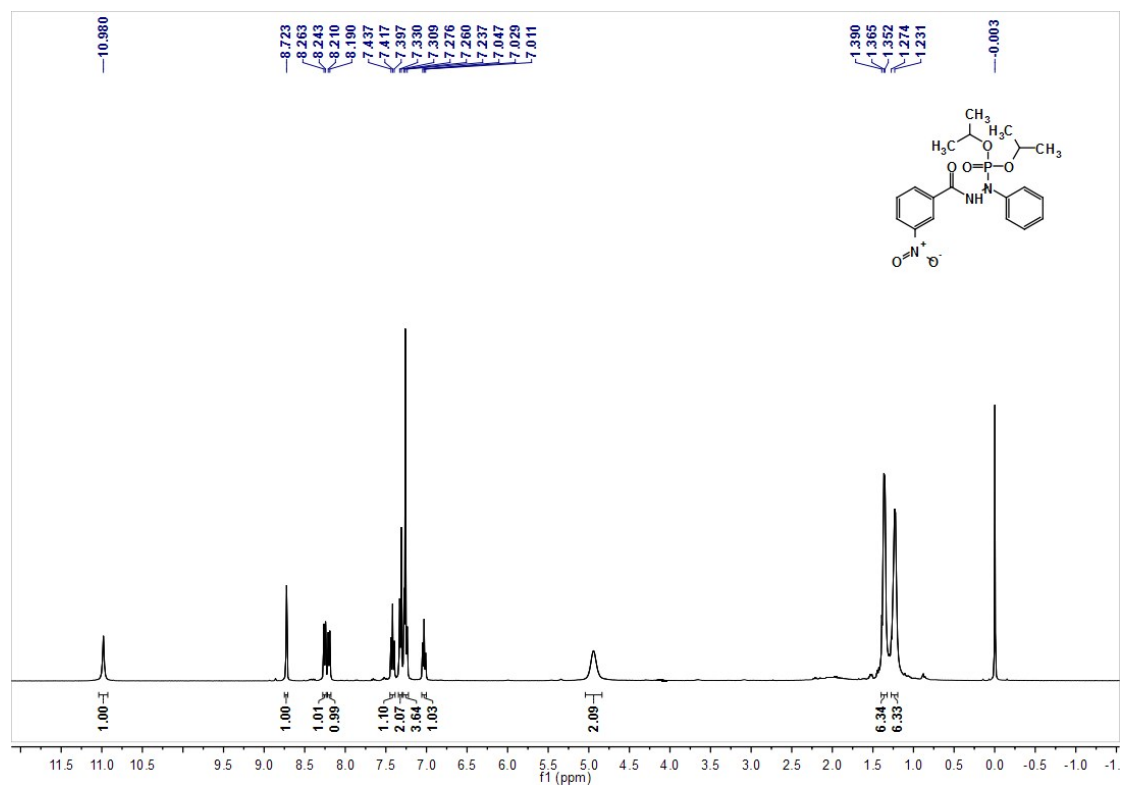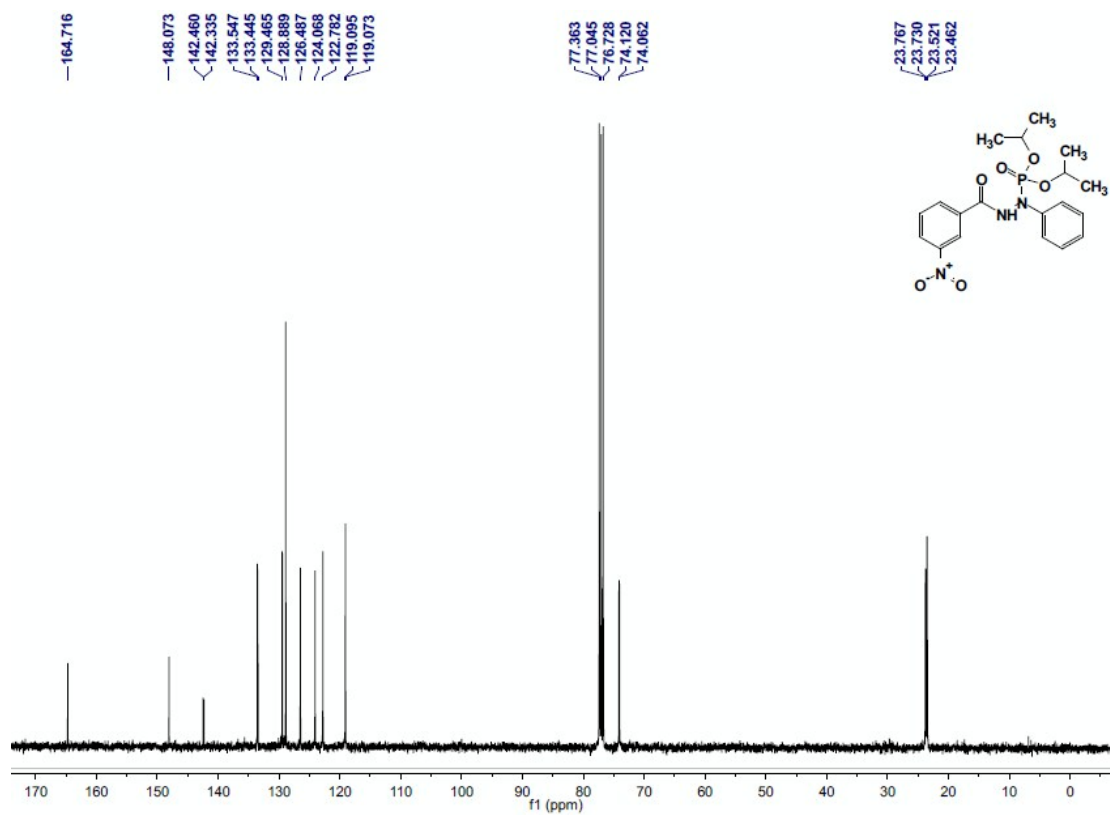

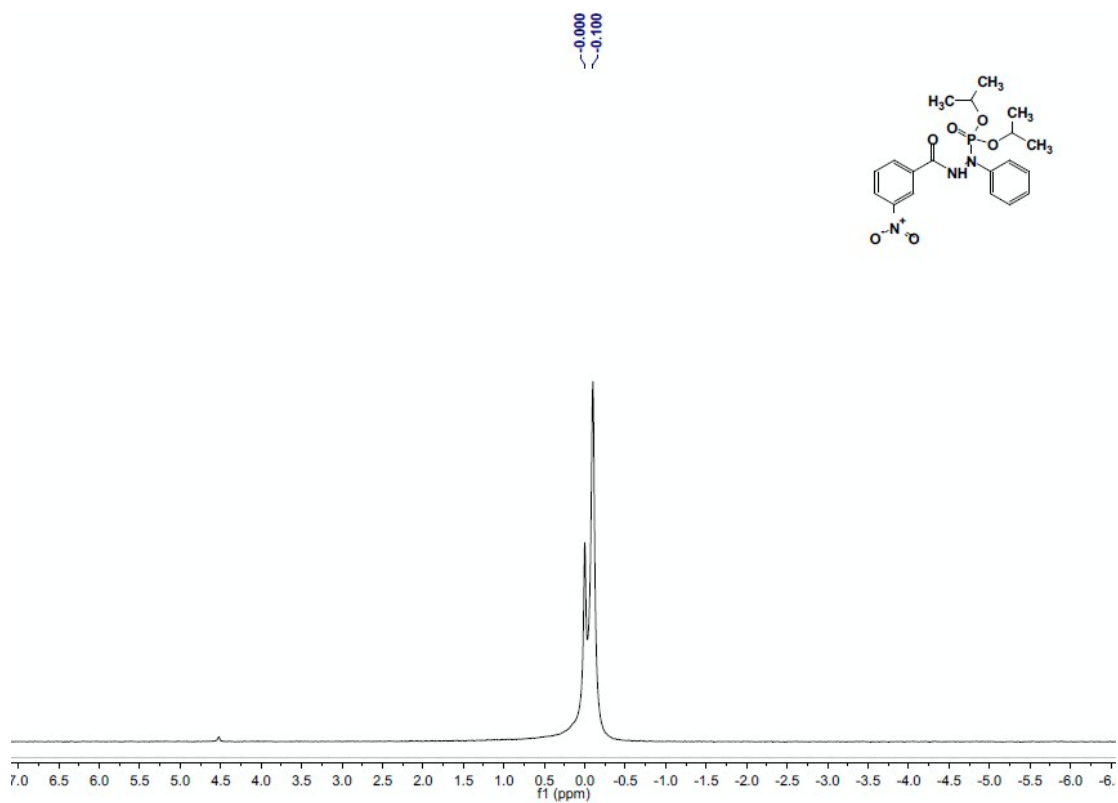

**Diisopropyl (2-(2-bromobenzoyl)-1-phenylhydrazinyl)phosphonate (3r)**

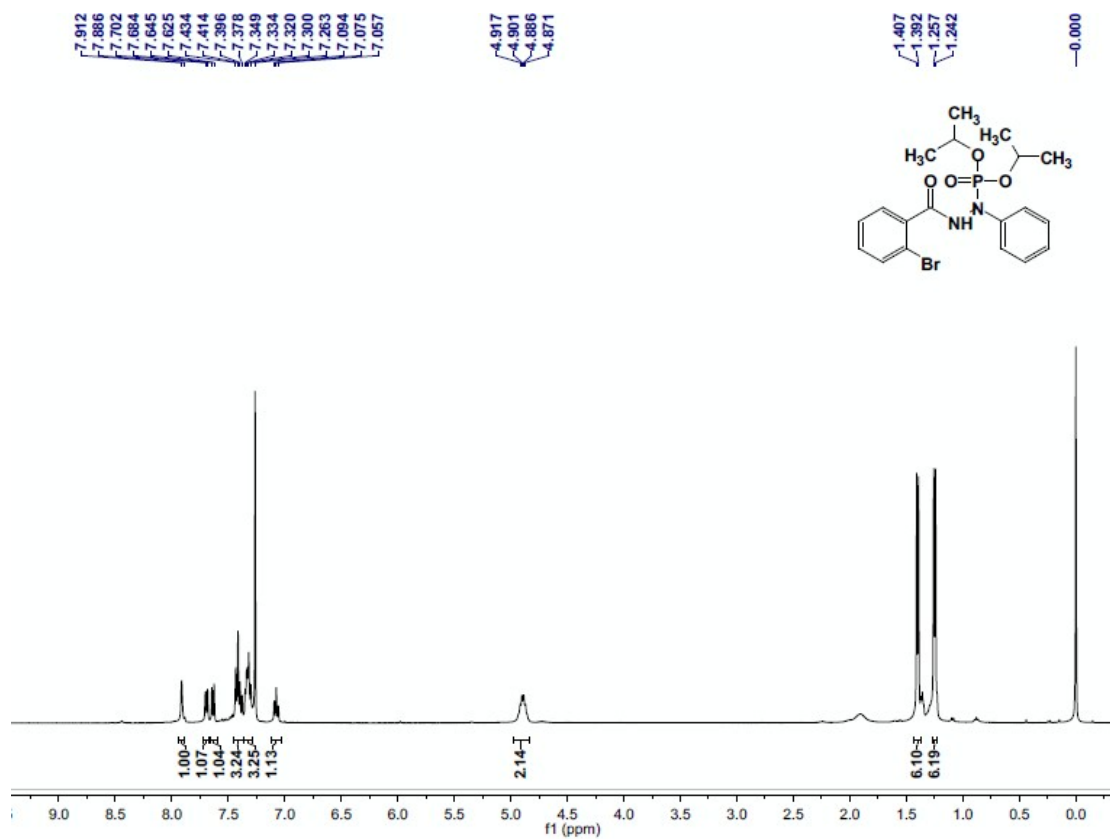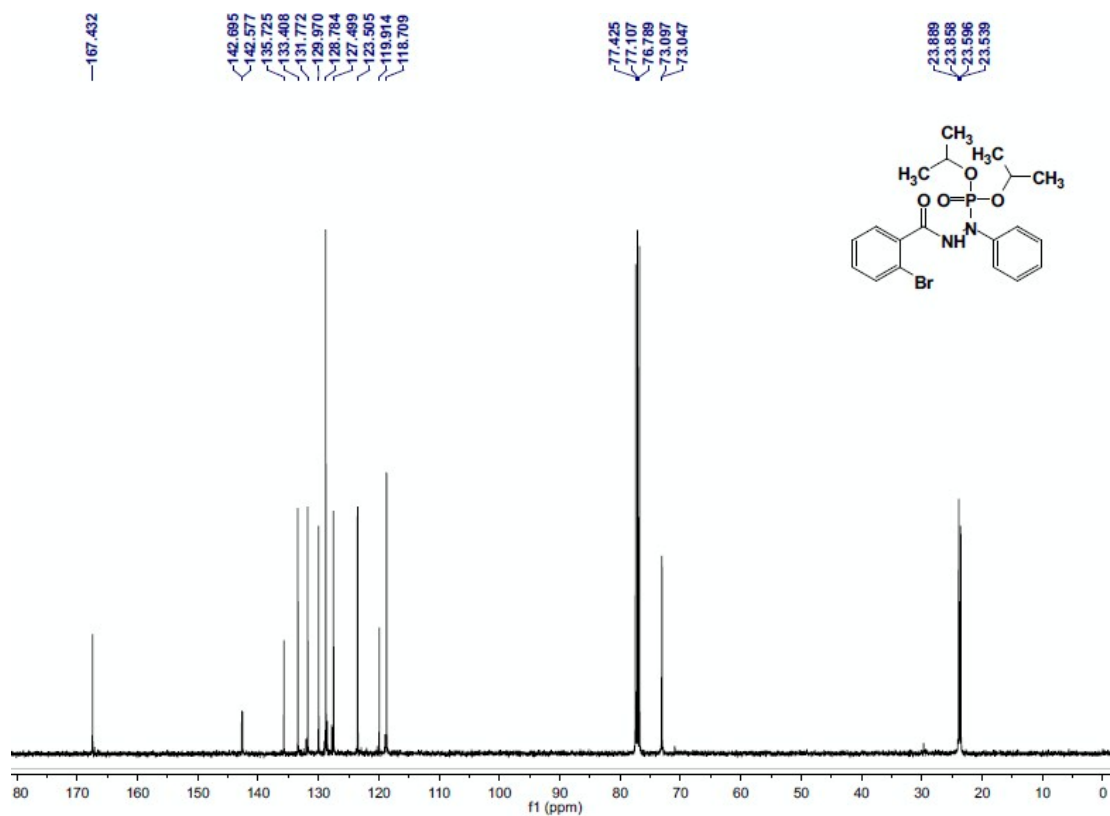

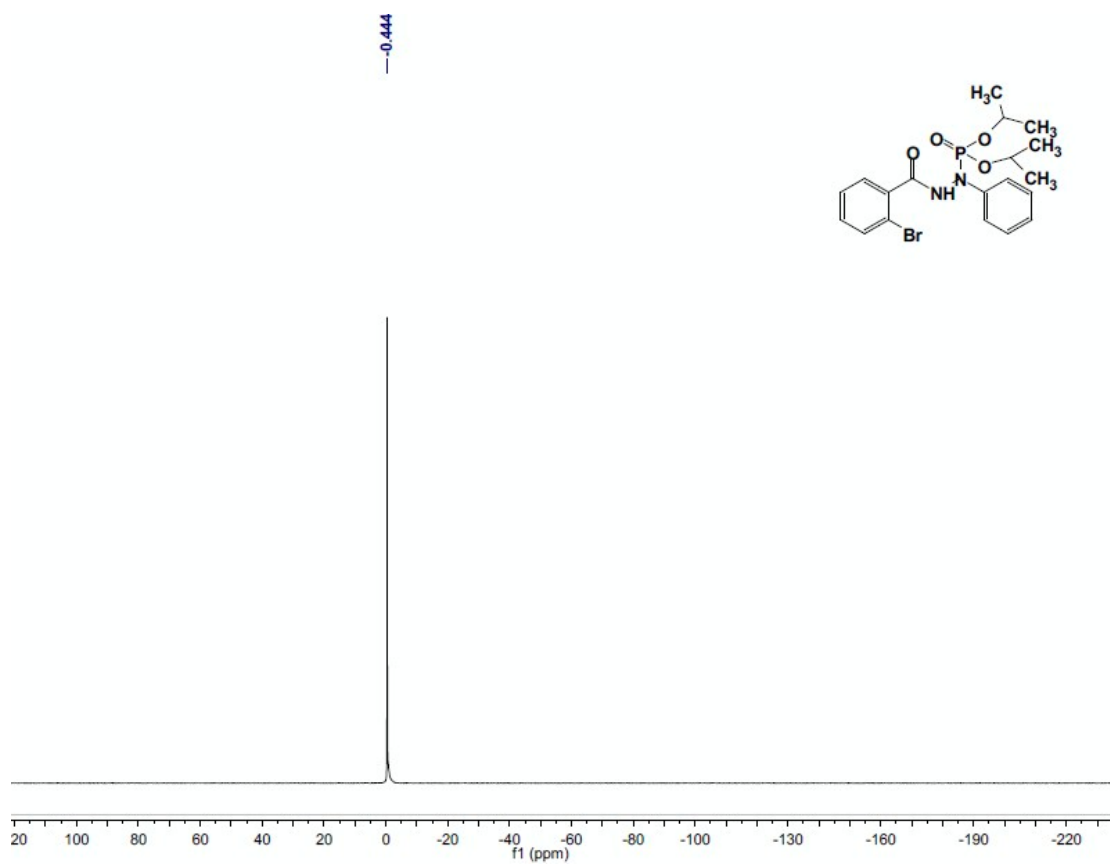



*Diisopropyl (2-acetyl-1-phenylhydrazinyl)phosphonate (3s)*

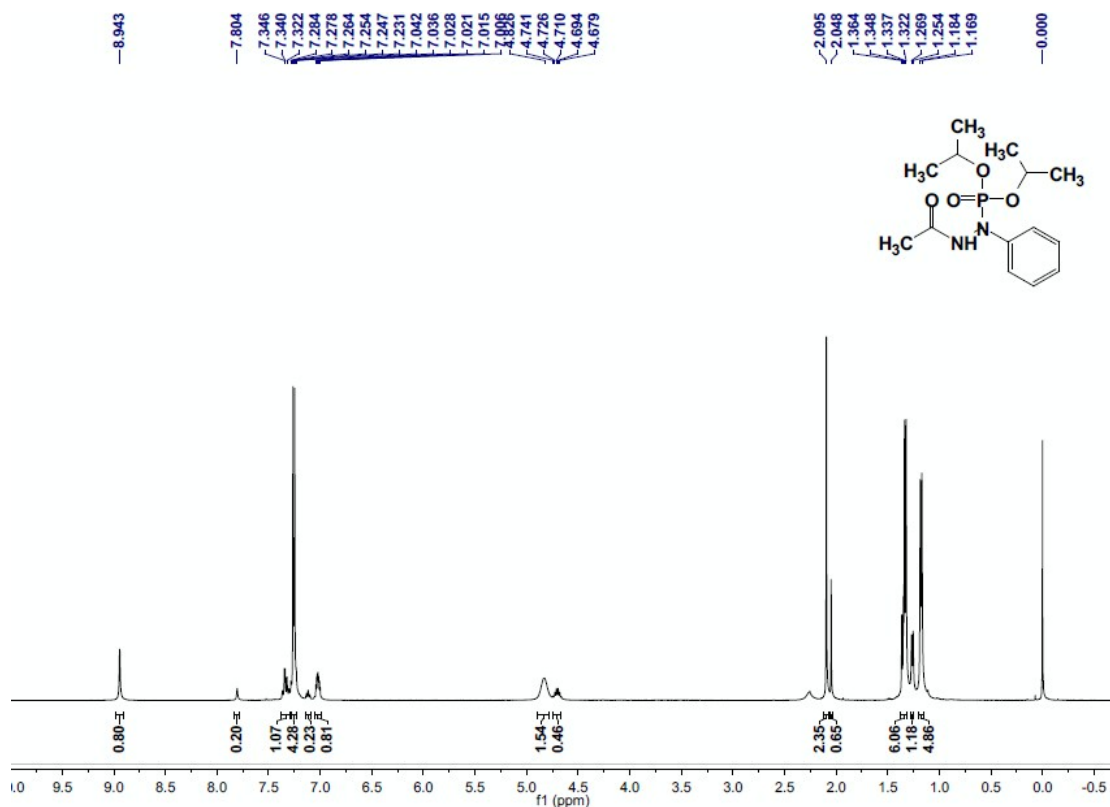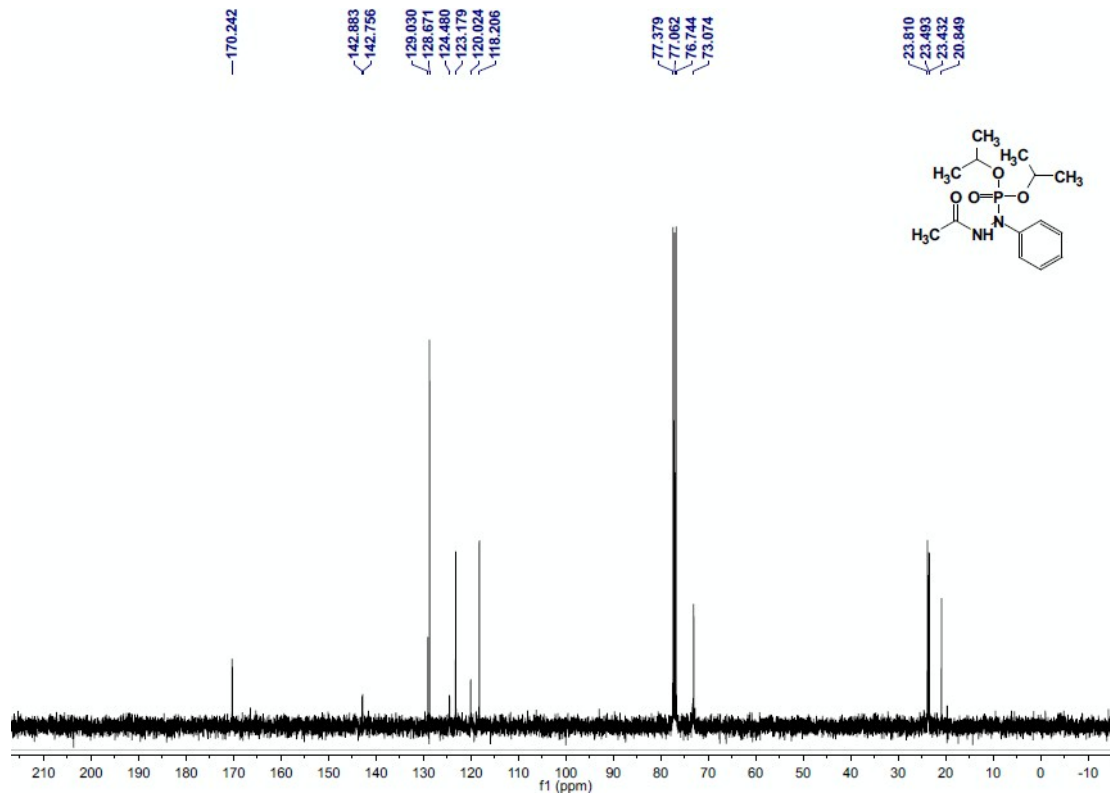

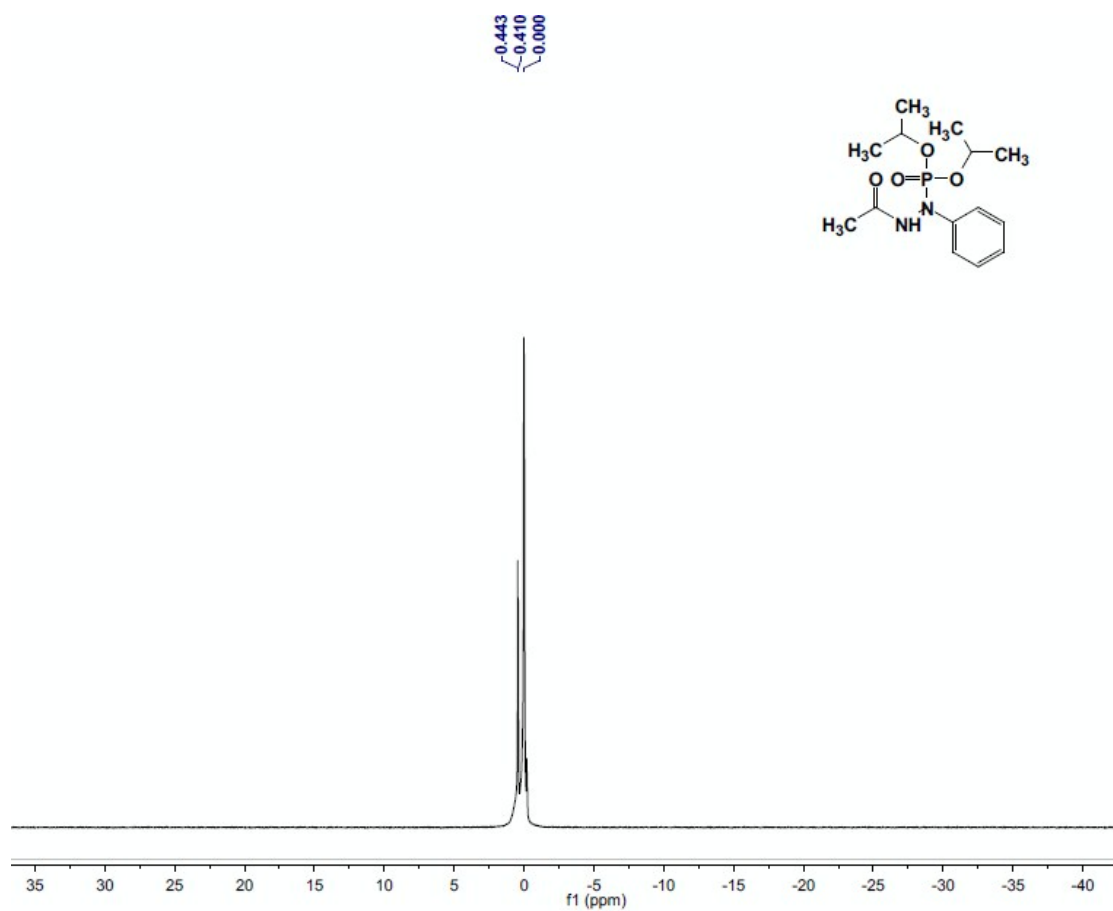

*tert*-Butyl 2-(diisopropoxyphosphoryl)-2-phenylhydrazinecarboxylate (3t)

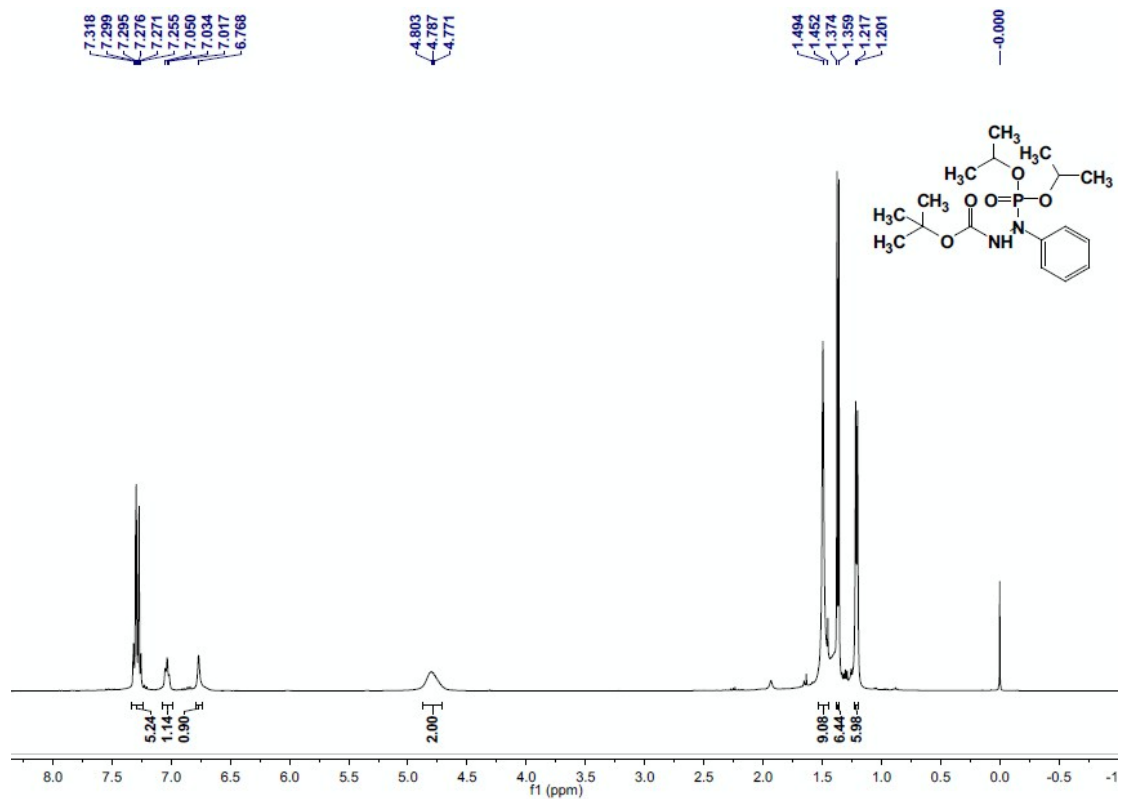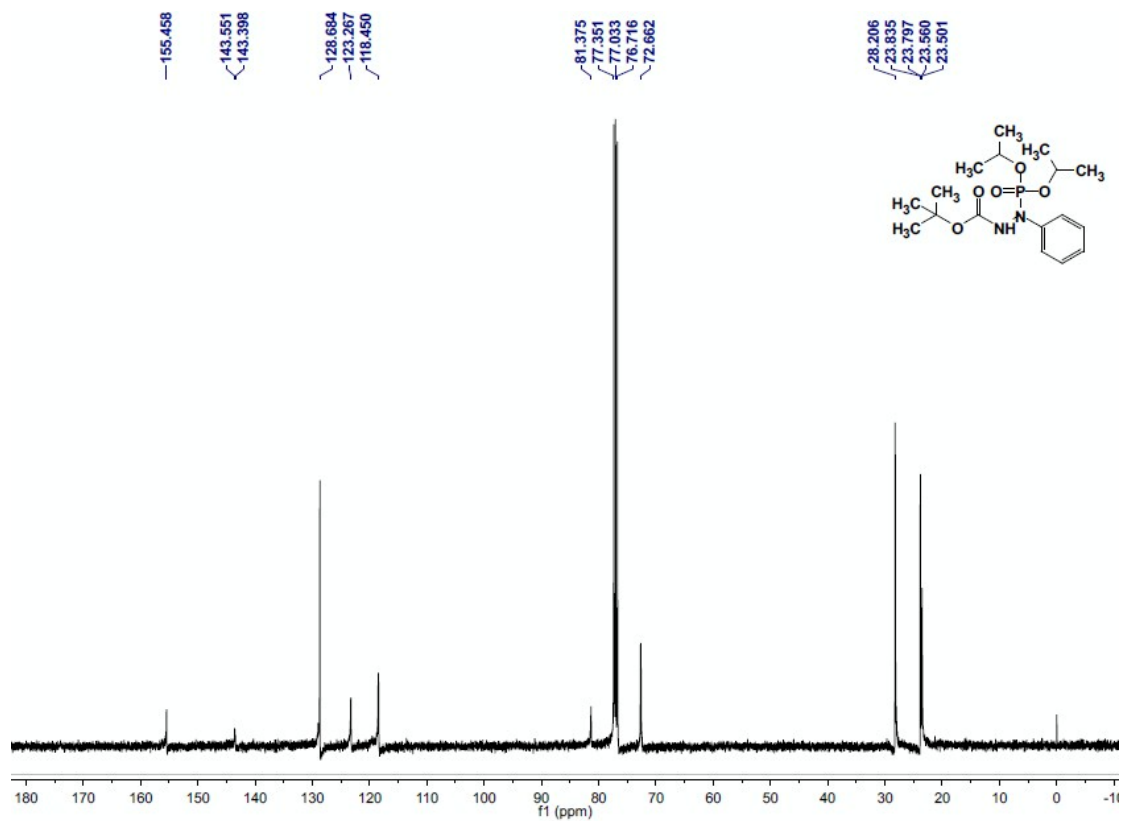

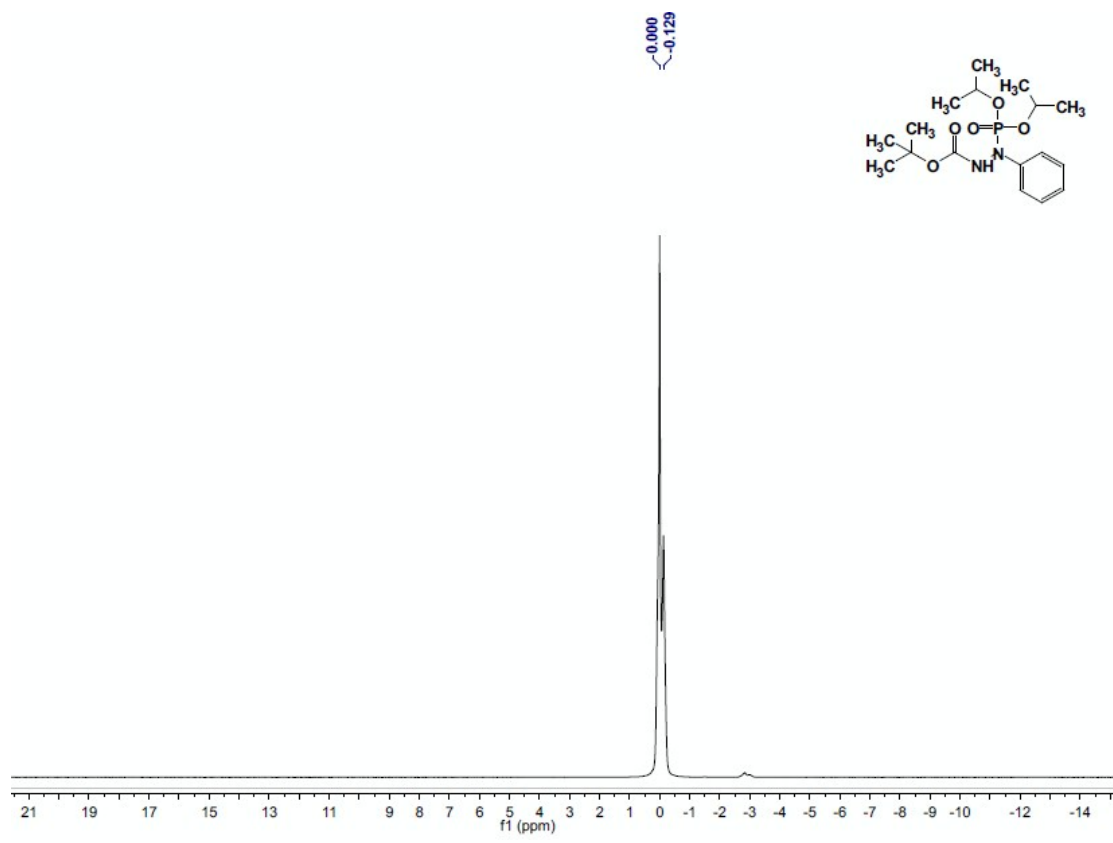

***tert*-Butyl 2-(diisopropoxyphosphoryl)-2-(4-fluorophenyl)hydrazinecarboxylate (3u)**

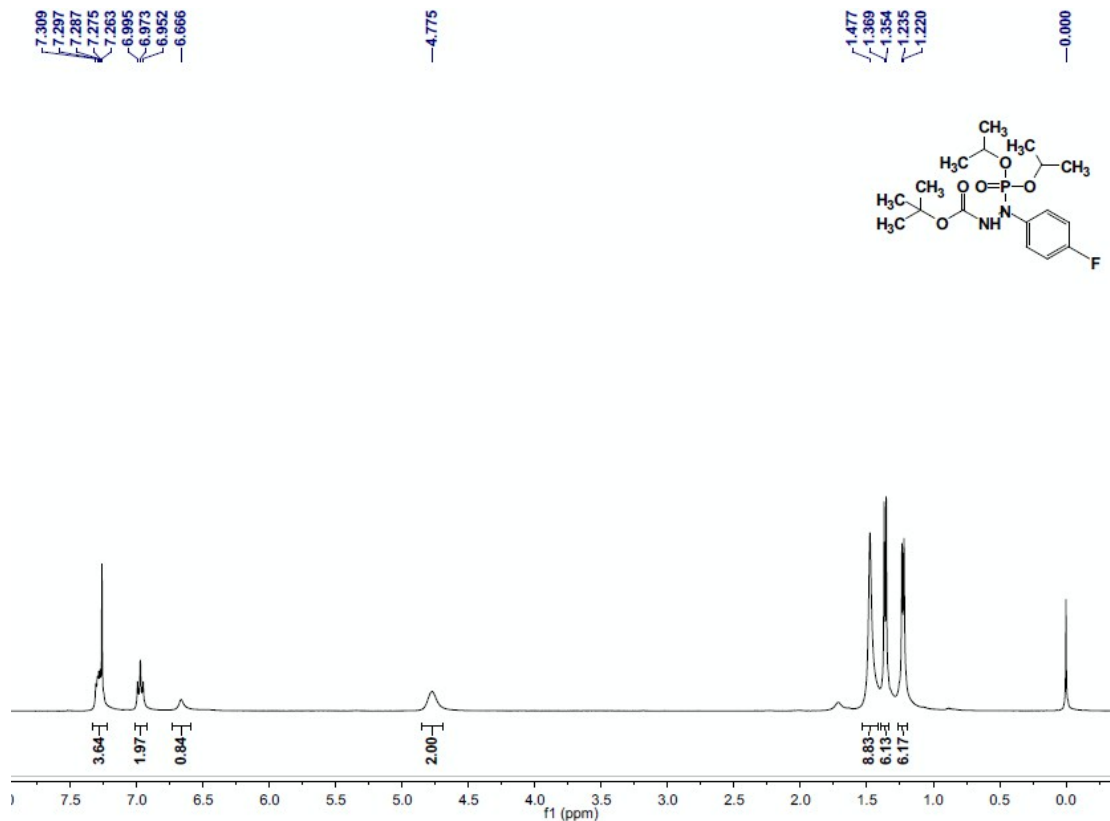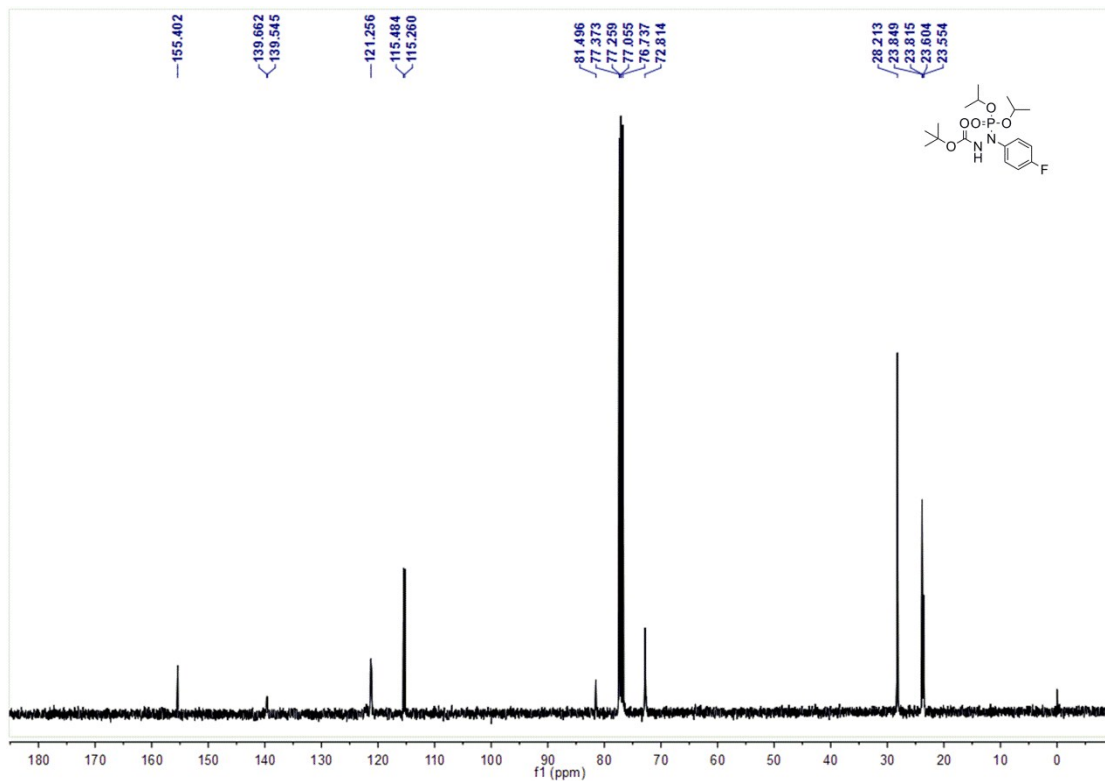

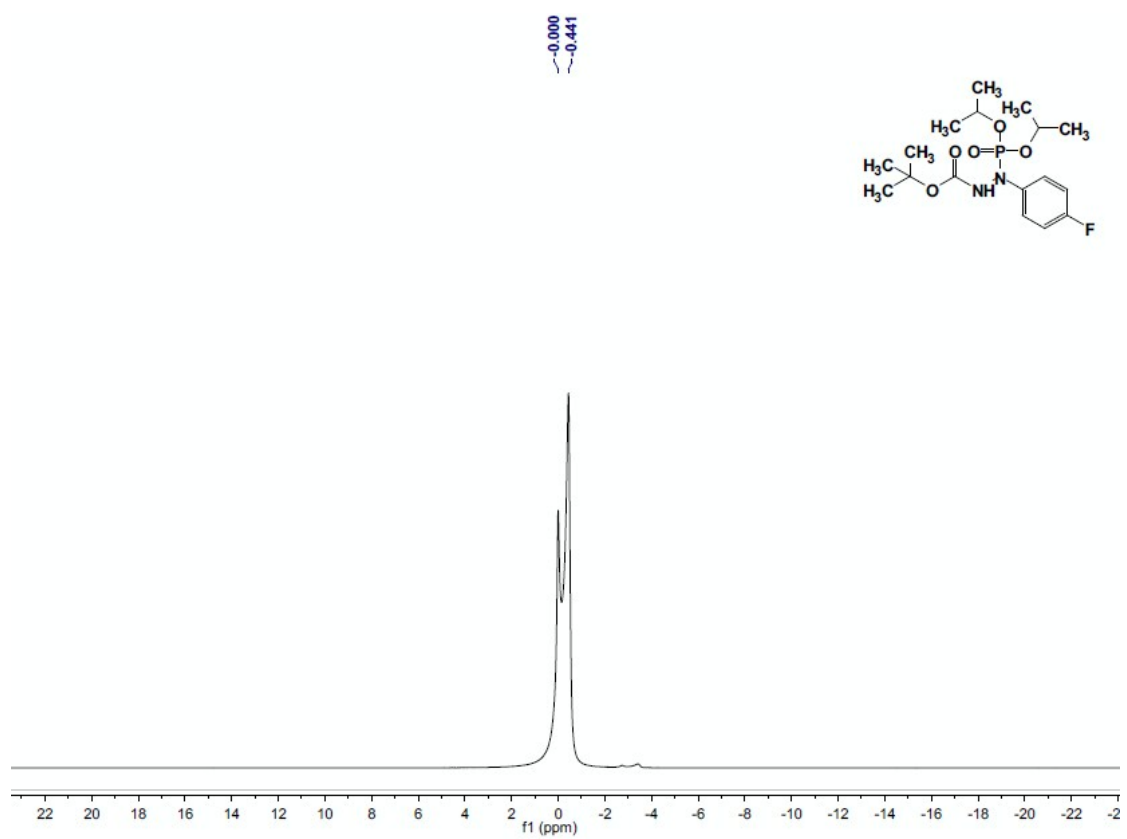

*tert*-Butyl 2-(4-chlorophenyl)-2-(diisopropoxyphosphoryl)hydrazinecarboxylate (**3v**)

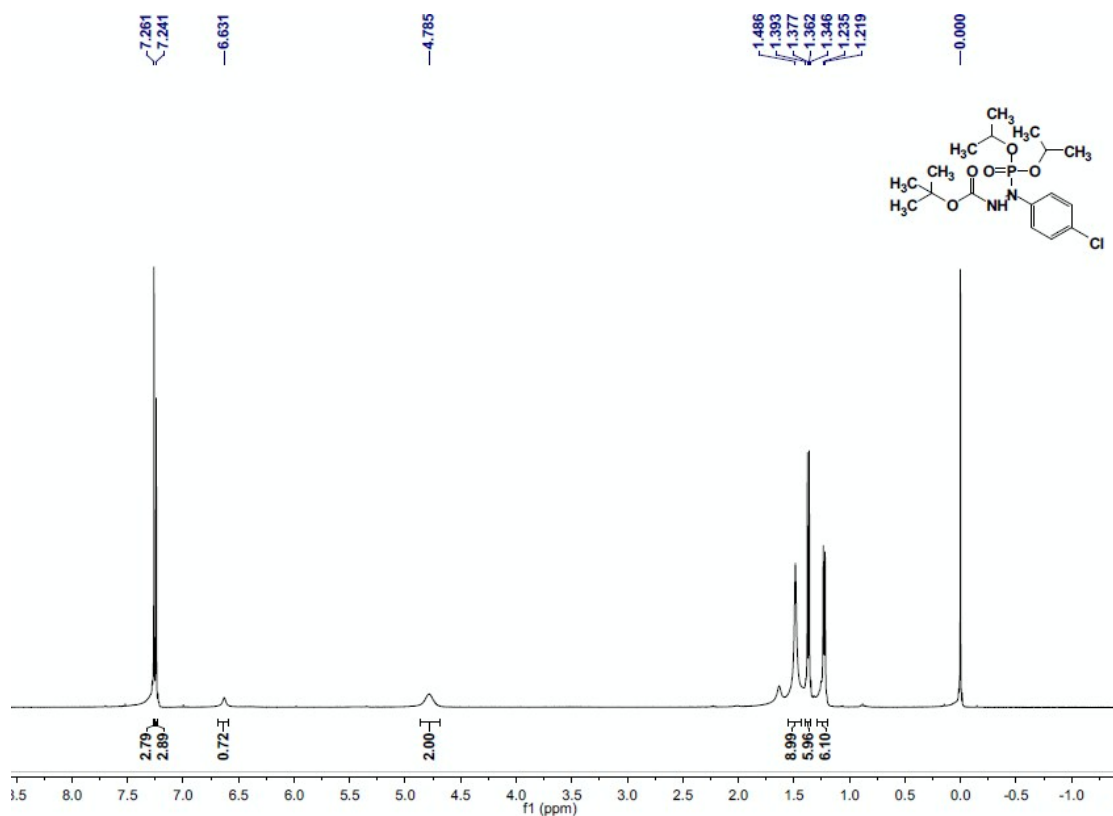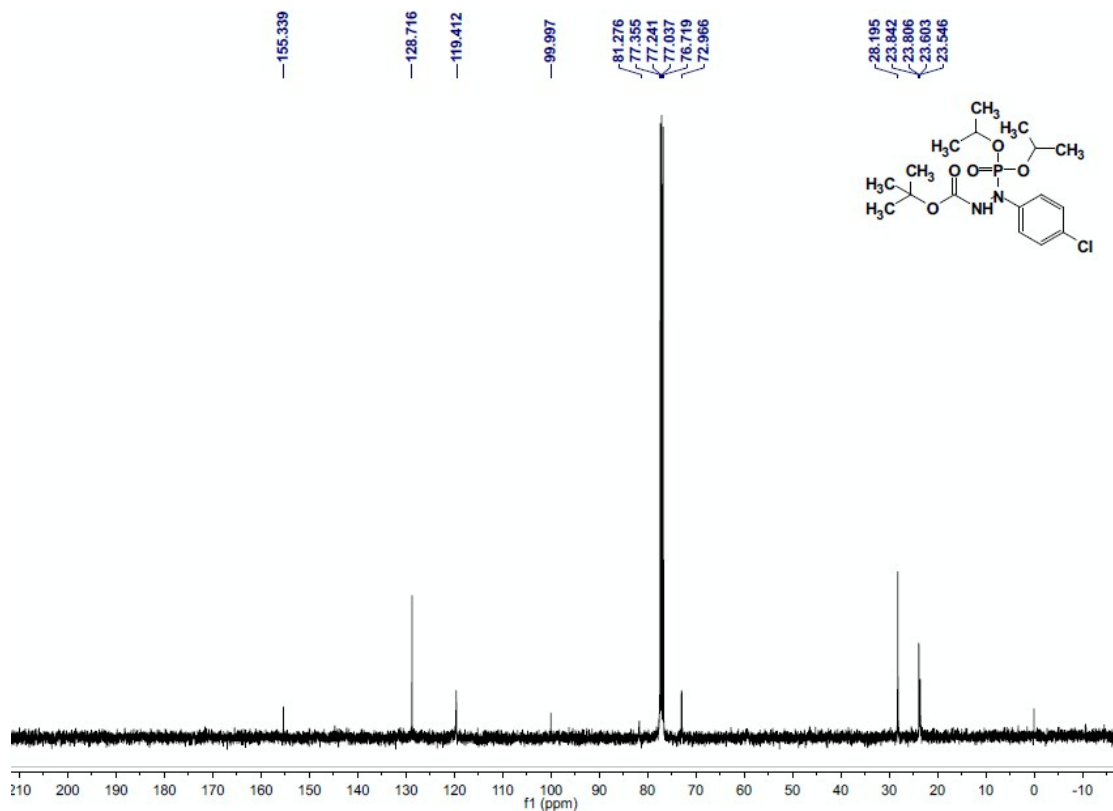

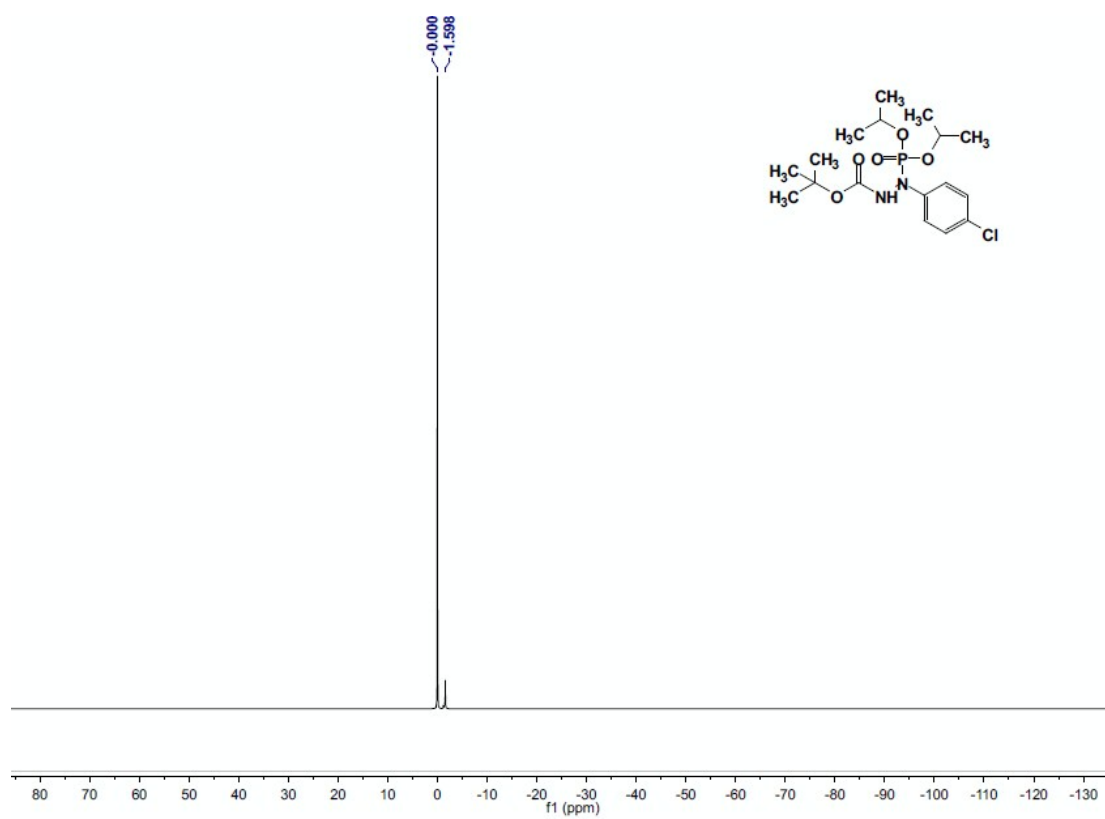



*tert*-Butyl 2-(4-bromophenyl)-2-(diisopropoxyphosphoryl)hydrazinecarboxylate (**3w**)

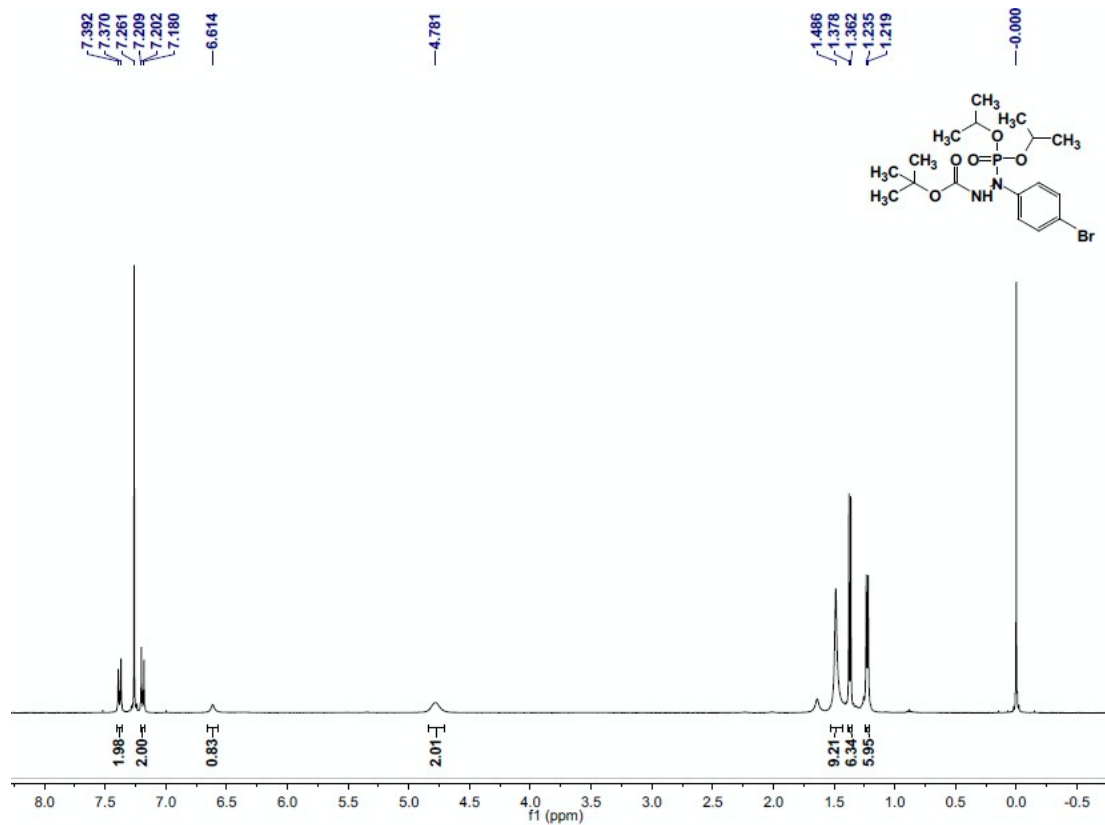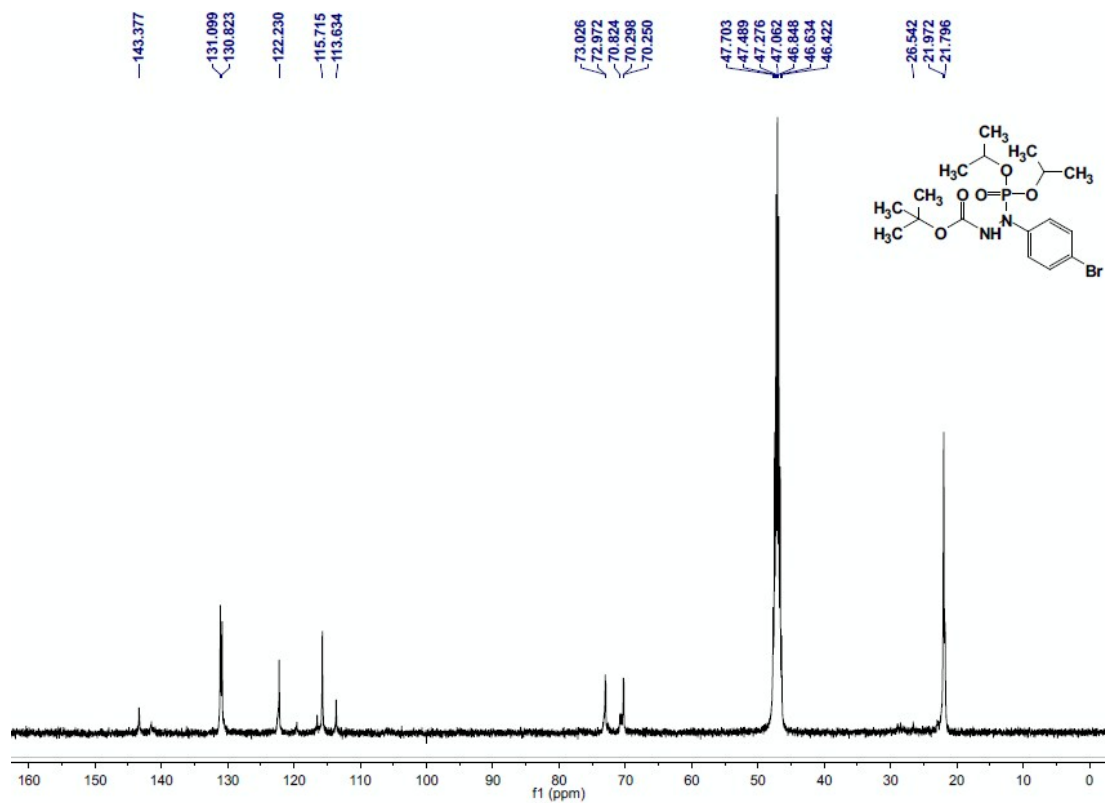

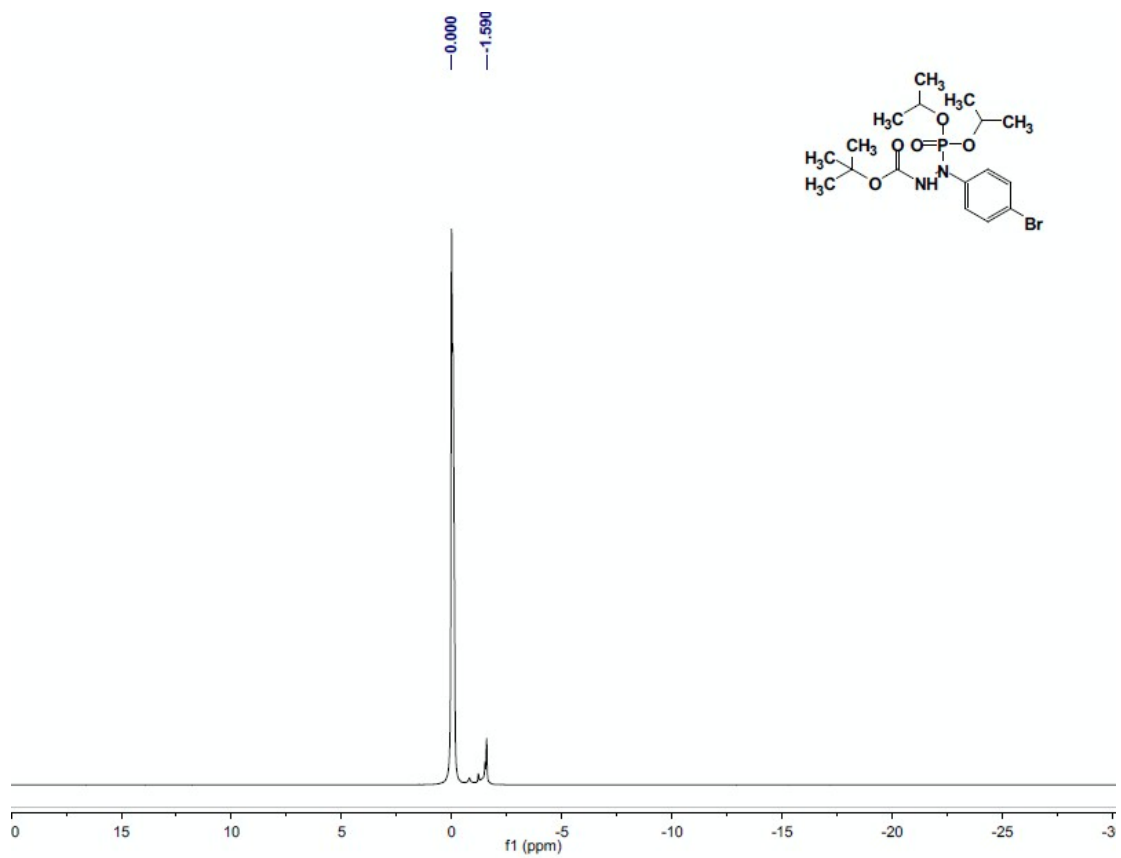

*tert-Butyl 2-(diisopropoxyphosphoryl)-2-(3,5-dimethylphenyl)hydrazinecarboxylate*  
(3x)

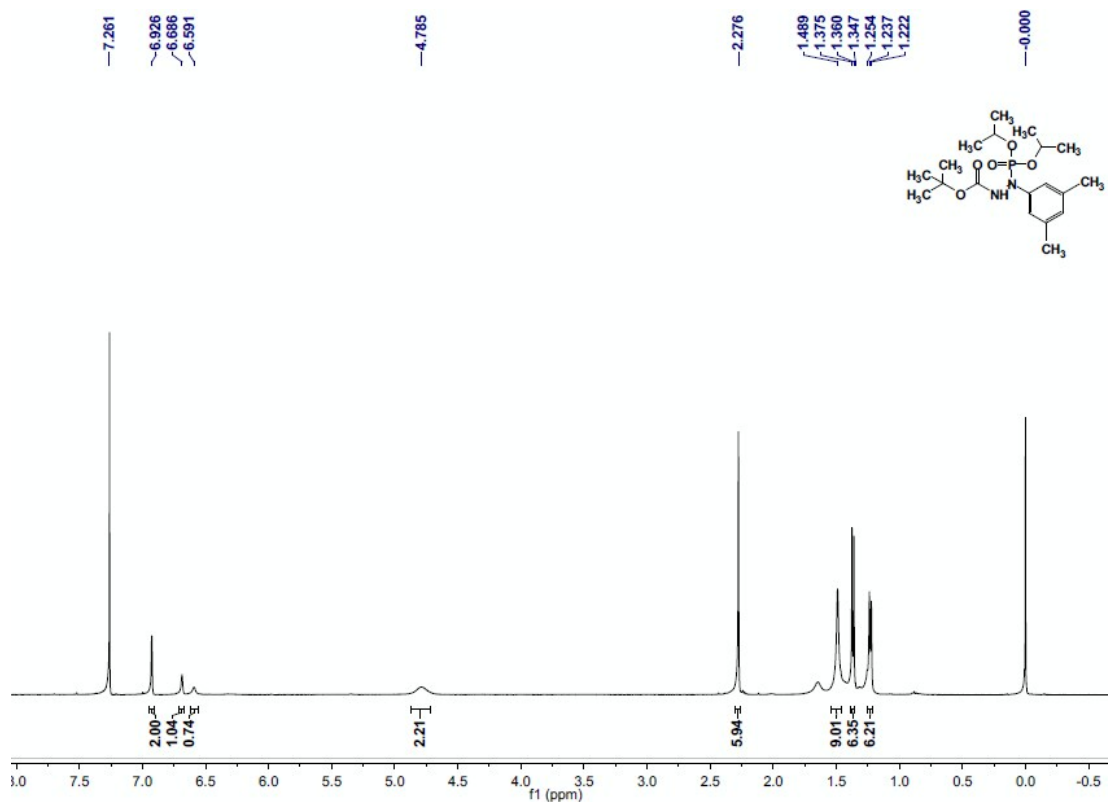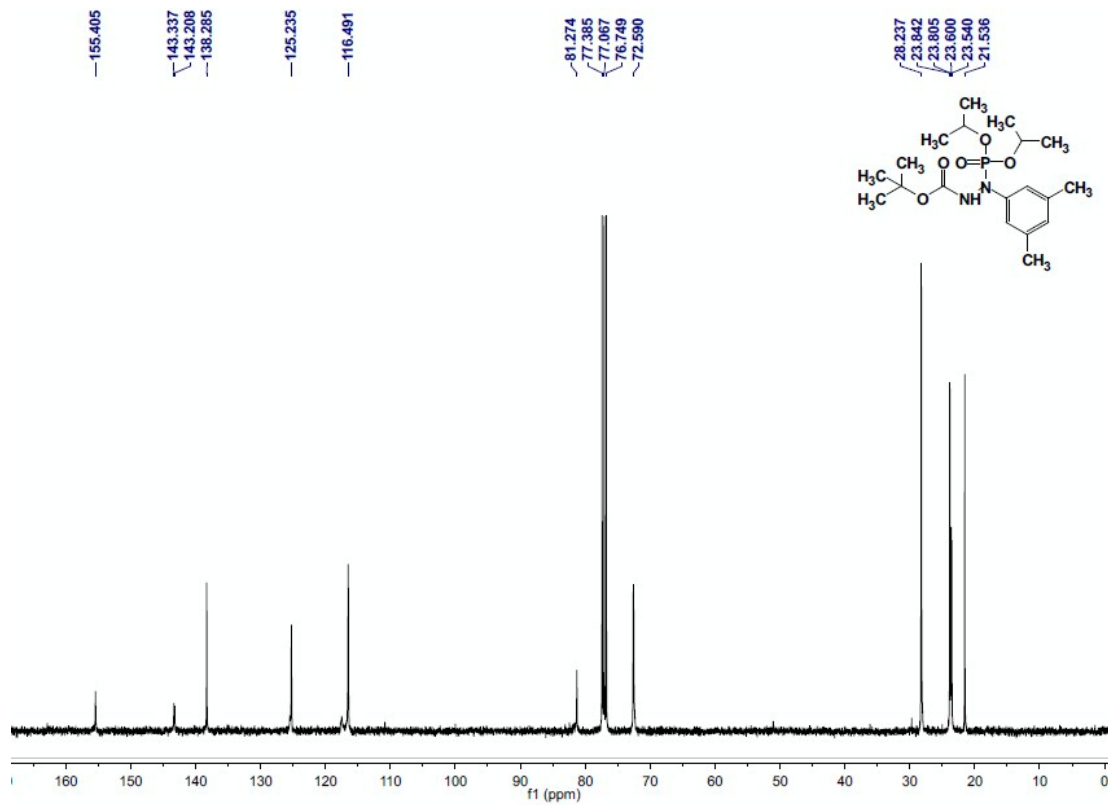

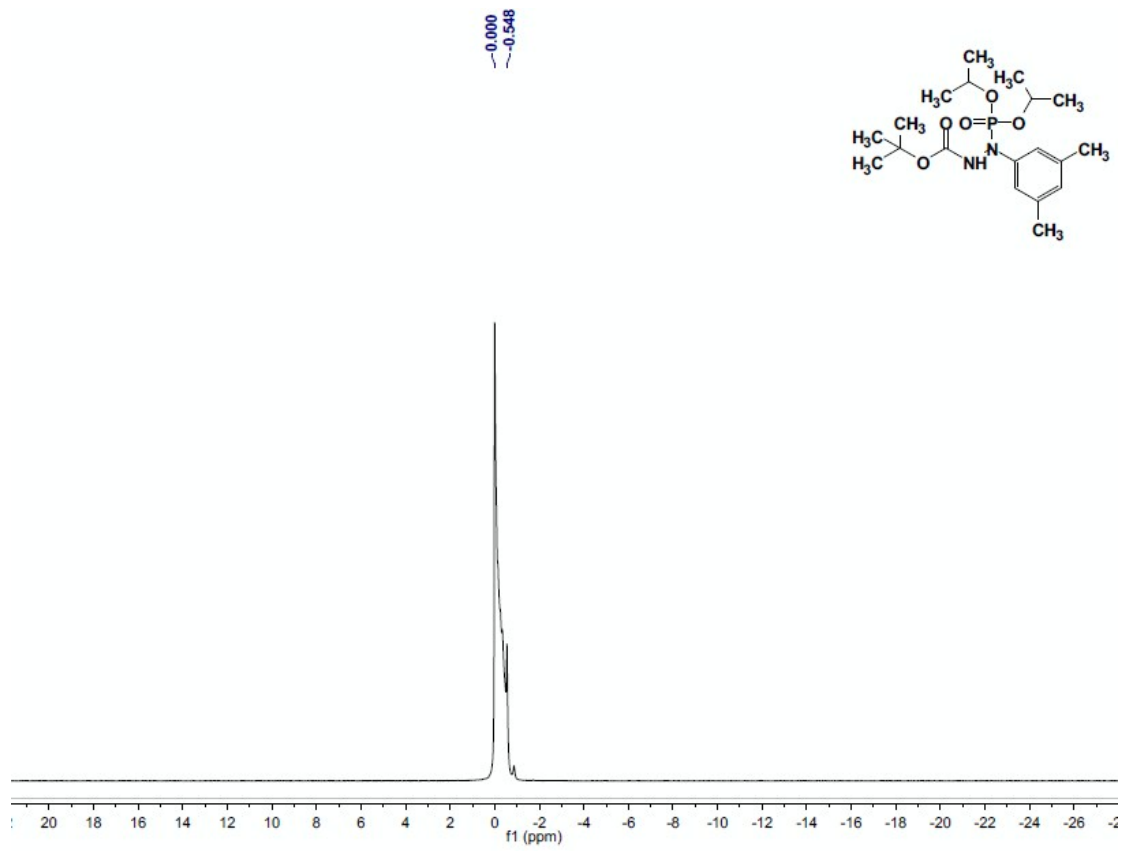

**Diethyl (2-benzoyl-1-phenylhydrazinyl)phosphonate (3y)**

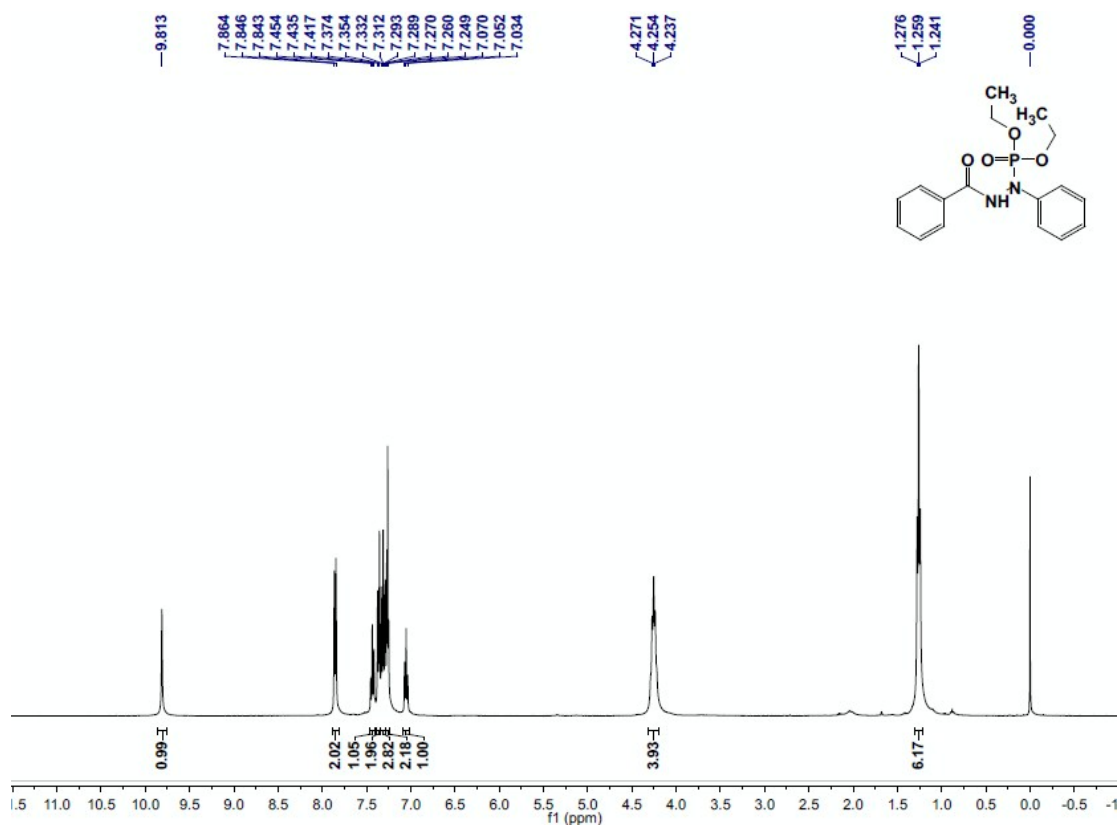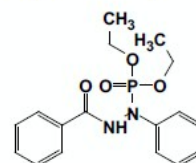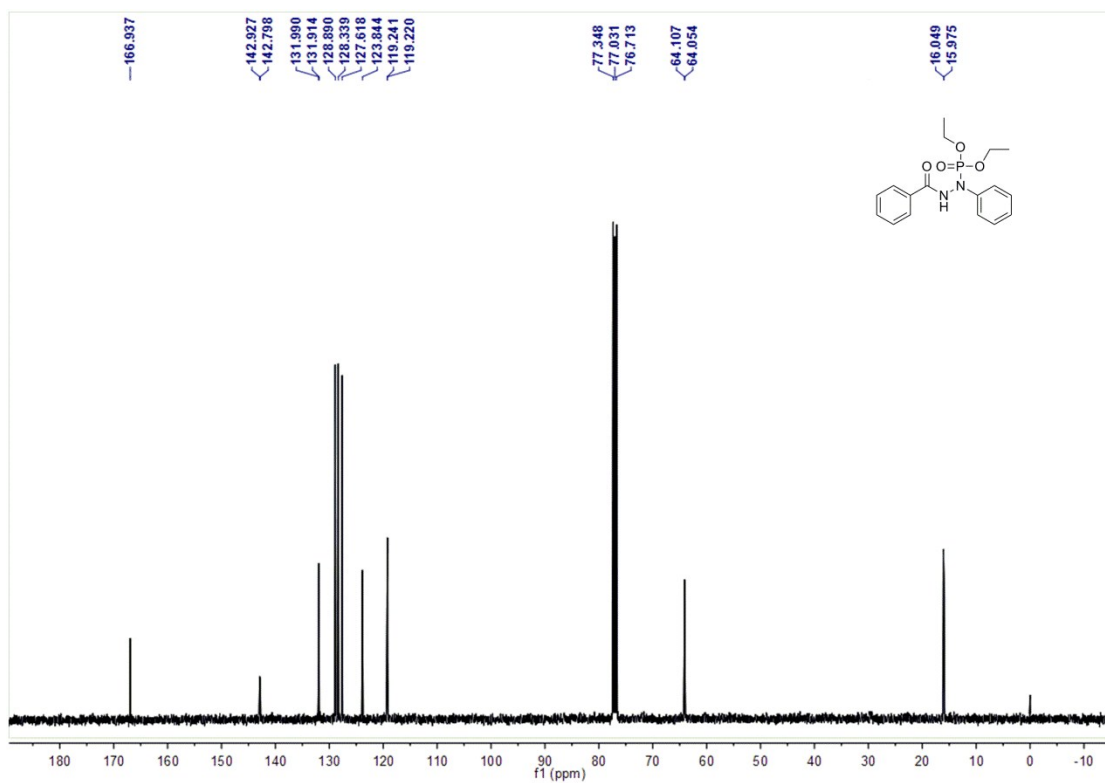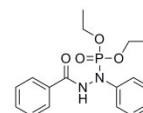

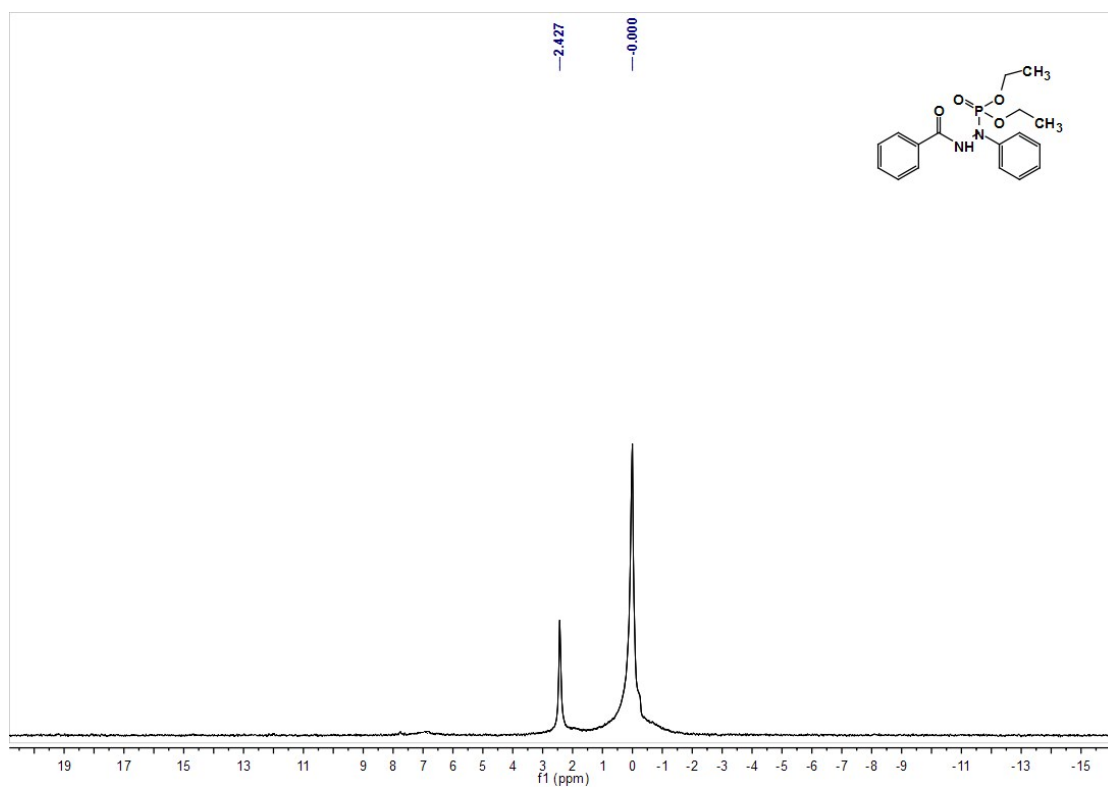

**Diisopropyl (1-phenylhydrazinyl)phosphonate (4)**

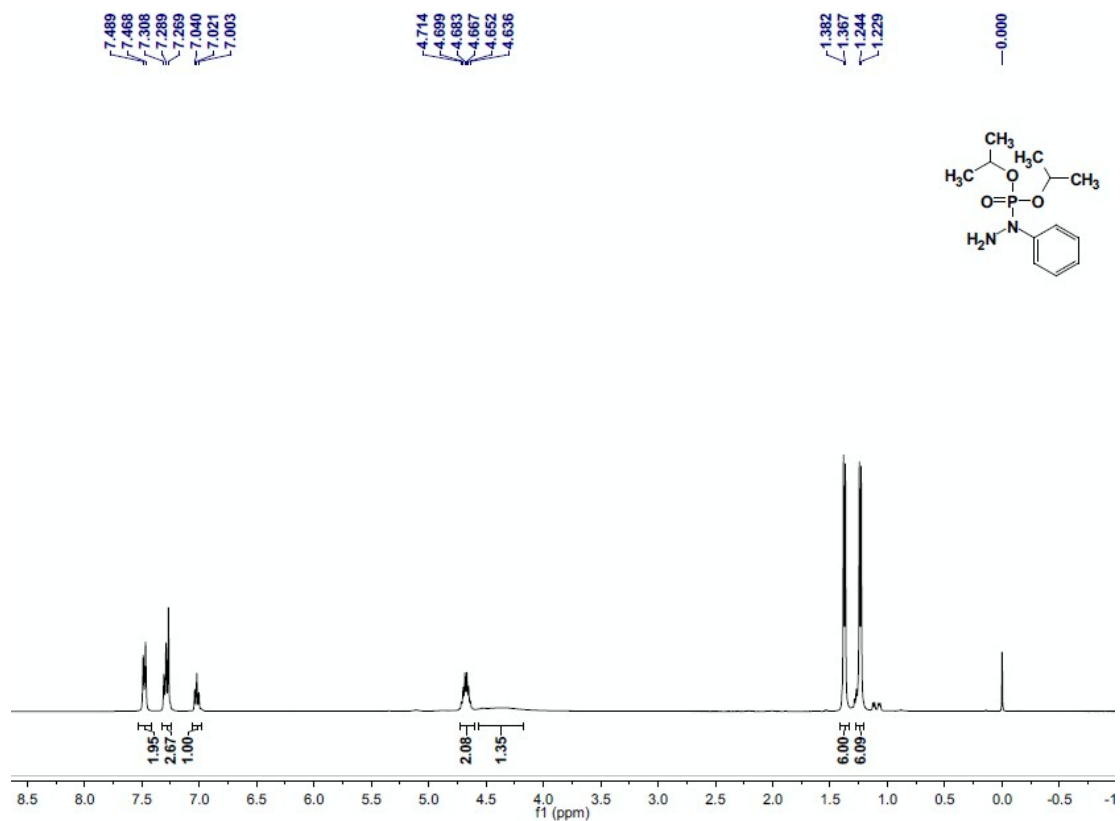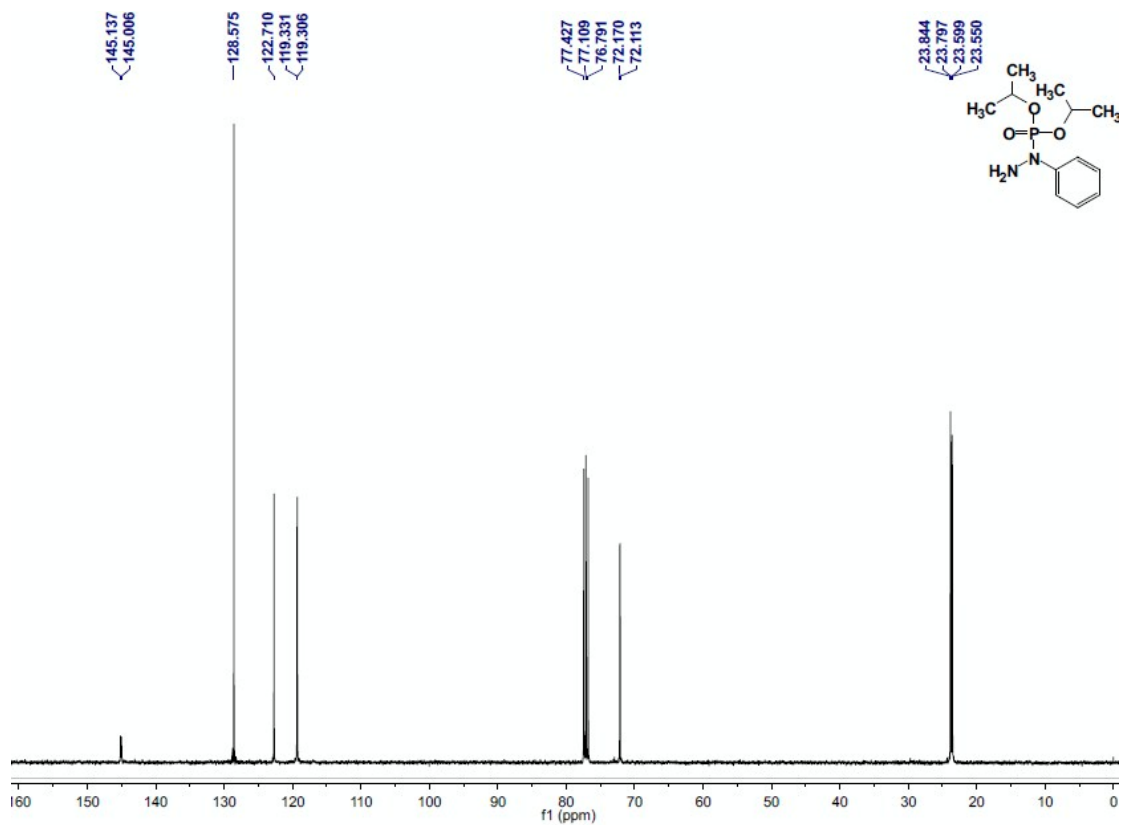

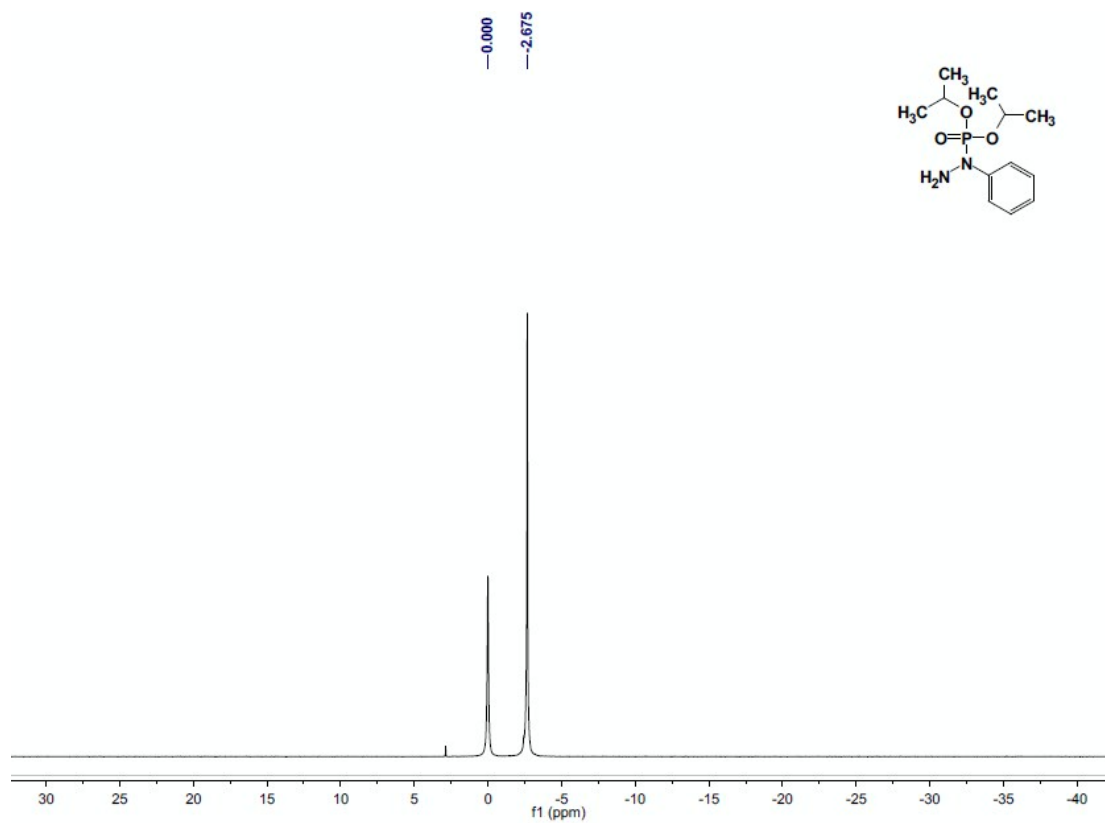

Supplement: c6ra13931k1.pdf [file c6ra13931k1.pdf]
